# Supplementary material for: Diversity of fungi from marine inundated wood from the Bay of Fundy, Nova Scotia, Canada
Source: publisher site journal article supplement (doi:10.1515/bot-2023-0005), 2023-07-12
Supplement: Supplementary file 1 [file j_bot-2023-0005_suppl_002.docx]

Diversity of fungi from marine inundated wood from the Bay of Fundy, Nova Scotia, Canada

Sarah J. Adams and Allison K. Walker

DOI 10.1515/bot-2023-0005

Supplementary Table S2: Sequence data for cultured fungi.

The following table summarizes data for the 290 fungi isolated during our study and provides sequence data for the 220 cultures that were sequenced (internal transcribed spacer [ITS] rDNA region). Sequences were identified by comparison with the National Center for Biotechnology Information (NCBI) GenBank online sequence database using the BLAST search tool to identify samples using >/= 97% sequence identity, e value of 0 and 100 % query coverage as species identification cut-offs. The GenBank accession number of the ‘closest match’ for each of our sequences is provided. Representative sequences for each fungal species were submitted to GenBank and can be found under accession numbers MT802442-MT802644. Each culture was given a lab culture number (AW#).

| **GB accession #** | **AW #** | **Genus and species** | **Authority** | **Sequenced** | **Region** | **Closest BLAST accession** | **% Identity** | **Coverage** | **e Value** | **Sequence** |
| --- | --- | --- | --- | --- | --- | --- | --- | --- | --- | --- |
| MT802543 | 2830 | *Fusarium flocciferum* | Corda 1828 | Yes. Successful. | ITS 4-5 | MH361305 | 99 | 100 | 0 | attaccgagtataaactccaaacccctgtgaacataccttaatgttgcctcggcggatcagcccgcgccccgtaaaacgggacggcccgccagaggacccaaactctaatgtttcttattgtaacttctgagtaaaacaaacaaataaatcaaaactttcaacaacggatctcttggttctggcatcgatgaagaacgcagcaaaatgcgataagtaatgtgaattgcagaattcagtgaatcatcgaatctttgaacgcacattgcgcccgctggtattccggcgggcatgcctgttcgagcgtcatttcaaccctcaagcccccgggtttggtgttggggatcggctctgccttctggcggtgccgcccccgaaatacattggcggtctcgctgcagcctccattgcgtagtagctaacacctcgcaactggaacgcggcgcggccatgccgtaaaaccccaacttctgaatgttgacct |
| MT802551 | 2831 | *Fusarium oxysporum* | Schltdl. 1824 | Yes. Successful. | ITS 4-5 | KX263816 | 99 | 100 | 0 | cattaccgagtttacaactccaaacccctgtgaacataccttatgttgcctcggcggatcagcccgcgccccgtaaaacgggacggcccgccgcaggaaccccaaaactctgtttttagtggaacttctgagtaaaaaaacaaataaatcaaaactttcaacaacggatctcttggttctggcatcgatgaagaacgcagcaaaatgcgataagtaatgtgaattgcagaattcagtgaatcatcgaatctttgaacgcacattgcgcccgccagtattctggcgggcatgcctgttcgagcgtcatttcaaccctcaaacccccgggtttggtgttggggatcgggcttttgcttcggcagcccggccccgaaatctagtggcggtctcgctgcagcctccattgcgtagtagctaacacctcgcaactggaacgcggcgcggccaagccgttaaacccccaacttctgaatgttgacct |
| MT802552 | 2839 | *Fusarium oxysporum* | Schltdl. 1824 | Yes. Successful. | ITS 4-5 | KX263816 | 99 | 100 | 0 | cattaccgagtttacaactcccaacccctgtgaacataccttatgttgcctcggcggatcagcccgcgccccgtaaaacgggacggcccgccgcaggaaccccaaaactctgtttttagtggaacttctgagtaaaaaaacaaataaatcaaaactttcaacaacggatctcttggttctggcatcgatgaagaacgcagcaaaatgcgataagtaatgtgaattgcagaattcagtgaatcatcgaatctttgaacgcacattgcgcccgccagtattctggcgggcatgcctgttcgagcgtcatttcaaccctcaaacccccgggtttggtgttggggatcgggcttttgcttcggcagcccggccccgaaatctagtggcggtctcgctgcagcctccattgcgtagtagctaacacctcgcaactggaacgcggcgcggccaagccgttaaacccccaacttctgaatgttgacct |
| MT802544 | 2840 | *Fusarium flocciferum* | Corda 1828 | Yes. Successful. | ITS 4-5 | MH361305 | 99 | 100 | 0 | cattaccgagtttacaactcccaacccctgtgaacataccttaatgttgcctcggcggatcagcccgcgccccgtaaaacgggacggcccgccagaggacccaaactctaatgtttcttattgtaacttctgagtaaaacaaacaaataaatcaaaactttcaacaacggatctcttggttctggcatcgatgaagaacgcagcaaaatgcgataagtaatgtgaattgcagaattcagtgaatcatcgaatctttgaacgcacattgcgcccgctggtattccggcgggcatgcctgttcgagcgtcatttcaaccctcaagcccccgggtttggtgttggggatcggctctgccttctggcggtgccgcccccgaaatacattggcggtctcgctgcagcctccattgcgtagtagctaacacctcgcaactggaacgcggcgcggccatgccgtaaaaccccaacttctgaatgttgacct |
| MT802573 | 2865 | *Neoascochyta paspali* | (P.R. Johnst.) Qian Chen & L. Cai 2015 | Yes. Successful. | ITS 4-5 | MK012408 | 99 | 100 | 0 | cattaccgagagttgtaggcttctgtctaccatctcttacccatgtcttttgcgtactacacgtttcctcggcaggtccgcctgccgttaggacaatttaaaccatttgcagttgcagtcagcgtctgaaaaacttaataattacaacttttaacaacggatctcttggttctggcatcgatgaagaacgcagcgaaatgcgataagtagtgtgaattgcagaattcagtgaatcatcgaatctttgaacgcacattgcgccccttggtattccatggggcatgcctgttcgagcgtcatttgtaccttcaagctctgcttggtgttgggtgtttgtcccgcctctgtgcgtggactcgccttaaagcaattggcagccgacgtattgtttcggagcgcagcacaaattgcgctttgtagctattacgacagcatccatcaagccttttttcacgcttgacct |
|  | 2866 |  |  | No |  |  |  |  |  |  |
|  | 2867 |  |  | No |  |  |  |  |  |  |
| MT802541 | 2868 | *Fusarium brachygibbosum* | Padwick 1945 | Yes. Successful. | ITS 4-5 | MG250444 | 97 | 100 | 0 | attaccgagtttacaactccaaacccctgtgaacataccttatgttgcctcggcggatcagcccgcgccccgtaaaacgggacggcccgccgcaggaaccccaaaactctgtttttagtggaacttctgagtaaaaaaacaaataaatcaaaactttcaacaacggatctcttggttctggcatcgatgaagaacgcagcaaaatgcgataagtaatgtgaattgcagaattcagtgaatcatcgaatctttgaacgcacattgcgcccgccagtattctggcgggcatgcctgttcgagcgtcatttcaaccctcaaacccccgggtttggtgttggggatcgggcttttgcttcggcagcccggccccgaaatctagtggcggtctcgctgcagcctccattgcgtagtagctaacacctcgcaactggaacgcggcgcggccaagccgttaaacccccaacttctgaatgttgacct |
| MT802633 | 2869 | *Septoriella* sp. | Oudem., 1889 | Yes. Successful. | ITS 4-5 | NR_132926 | 96 | 97 | 0 | cattacaattcagtagcttgctactgtcagaaggcgcgataagcccgtatagtttaattactgatgagcggcagcccttttgtttgtacccttgtcttttgcgcactcatgtttcctcggcgggtctgcccgccgattggacaaaactataaccttttttattttcaatcagcgtctgaaaacaattaataattacaactttcaacaacggatctcttggttctggcatcgatgaagaacgcagcgaaatgcgataagtagtgtgaattgcagaattcagtgaatcatcgaatctttgaacgcacattgcgccccttggtattccatggggcatgcctgttcgagcgtcatttgtaccctcaagctctgcttggtgttgggtgtttgtcctctcctctgcgattggactcaccttaaagcaattggcagccagtgttttggtattgaagcgcagcacattttgcgattctagcctaaatacttgcgtccacaagccttttttataacgcttgacct |
| MT802574 | 2870 | *Neoascochyta paspali* | (P.R. Johnst.) Qian Chen & L. Cai 2015 | Yes. Successful. | ITS 4-5 | MK012408 | 99 | 100 | 0 | attacctacagttgtaggcttctgtctaccatctcttacccatgtcttttgcgtactacacgtttcctcggcaggtccgcctgccgttaggacaatttaaaccatttgcagttgcagtcagcgtctgaaaaacttaataattacaacttttaacaacggatctcttggttctggcatcgatgaagaacgcagcgaaatgcgataagtagtgtgaattgcagaattcagtgaatcatcgaatctttgaacgcacattgcgccccttggtattccatggggcatgcctgttcgagcgtcatttgtaccttcaagctctgcttggtgttgggtgtttgtcccgcctctgtgcgtggactcgccttaaagcaattggcagccgacgtattgtttcggagcgcagcacaaattgcgctttgtagctattacgacagcatccatcaagccttttttcacgcttgacct |
| MT802512 | 2871 | *Corollospora maritima* | Werderm. 1922 | Yes. Successful. | ITS 4-5 | KF916001 | 99 | 100 | 0 | cattagcgagtctcagcactccaaacactgcgaaccgtcccgtgccggcgccgttgcttcggcgggcggggcaggtcgccgtccacctcggtgggcggccctgcccgctccatcagaaggggggggacgcccccccggacgctggaacgcccgccggcggtgccaaaccttctgtatttatagcggccttcacactgagtggtactgcaagcaagcaaaaaaaaaactttcaacaacggatctcttggctctggcatcgatgaaaaacgcagcgaaatgcgataagtaatgcgaattgcaaatttcagtgaatcatcgaatttttgaacgcacattgcacccggcggccattccgccgggtctgcctgttcgagcgtcgtttctcccctcgagacccccgggactcggtgttggggatctgcagggcccccacgggcgctgcagtccctgaaattcagtggcgggacatgctggaggccccctgcgcagtaaccaaatctcgcatcgggtgccggcgtgccctggccgtcaaccggtcggtgccccaggtgccgtccacagaacagtcgacct |
| MT802531 | 2872 | *Fusarium avenaceum* | (Fr.) Sacc. 1886 | Yes. Successful. | ITS 4-5 | MK012402 | 99 | 100 | 0 | cattaccgagtttacaactcccaacccctgtgaacataccttaatgttgcctcggcggatcagcccgcgccccgtaaaacgggacggcccgccagaggacccaaactctaatgtttcttattgtaacttctgagtaaaacaaacaaataaatcaaaactttcaacaacggatctcttggttctggcatcgatgaagaacgcagcaaaatgcgataagtaatgtgaattgcagaattcagtgaatcatcgaatctttgaacgcacattgcgcccgctggtattccggcgggcatgcctgttcgagcgtcatttcaaccctcaagcccccgggtttggtgttggggatcggctctgccttctggcggtgccgcccccgaaatacattggcggtctcgctgcagcctccattgcgtagtagctaacacctcgcaactggaacgcggcgcggccatgccgtaaaaccccaacttctgaatgttgacct |
| MT802542 | 2873 | *Fusarium brachygibbosum* | Padwick 1945 | Yes. Successful. | ITS 4-5 | MG250444 | 97 | 100 | 0 | cattaccgagtttacaactccaaacccctgtgaacataccttatgttgcctcggcggatcagcccgcgccccgtaaaacgggacggcccgccgcaggaaccccaaaactctgtttttagtggaacttctgagtaaaaaaacaaataaatcaaaactttcaacaacggatctcttggttctggcatcgatgaagaacgcagcaaaatgcgataagtaatgtgaattgcagaattcagtgaatcatcgaatctttgaacgcacattgcgcccgccagtattctggcgggcatgcctgttcgagcgtcatttcaaccctcaaacccccgggtttggtgttggggatcgggcttttgcttcggcagcccggccccgaaatctagtggcggtctcgctgcagcctccattgcgtagtagctaacacctcgcaactggaacgcggcgcggccaagccgttaaacccccaacttctgaatgttgacct |
| MT802443 | 2874 | *Acremonium fuci* | Summerb., Zuccaro & W. Gams 2004 | Yes. Successful. | ITS 4-5 | MF186078 | 99 | 100 | 0 | cattactgagttacaactcccaaacccctgtgaacatacctatgttgcttcggcgggccgtcccgcggcgcgcccacgtggcgtgacccggaaccaggcgcccgccggggacccaaactcttgcctgtatagtgtctcctctgagtggcataagcaaaaataaacaaaactttcagcaacggatctcttggttctggcatcgatgaagaacgcagcgaaatgcgataagtaatgtgaattgcagaattcagtgaatcatcgaatctttgaacgcacattgcgcccgccagtattctggcgggcatgcctgtctgagcgtcatttcaaccctcagcccccgctcgcggggcgctggcgttggggctcggccgtccaccgcggcggccggccccgaaacacagtggcggtctcccgcggactcccctgcgtagtagcactacctcgcagaagggacgagcgggctggccacgccgtaaaaccccccacttctcaaggttgacct |
|  | 2875 |  |  | No |  |  |  |  |  |  |
|  | 2876 | *Cystofilobasidium infirmominiatum* | (Fell, I.L. Hunter & Tallman) Hamam., Sugiy. & Komag. 1988 | Yes. Sequence quality poor. ID based on morphology comparison with similar sequenced cultures. | ITS 4-5 |  |  |  |  |  |
|  | 2877 |  |  | No |  |  |  |  |  |  |
|  | 2878 | *Zalerion* sp. | R.T.Moore & Meyers, 1962 | Yes. Sequence quality poor. ID based on morphology comparison with similar sequenced cultures. | ITS 4-5 |  |  |  |  |  |
| MT802639 | 2879 | *Vishniacozyma* sp. | Xin Zhan Liu, F.Y.Bai, M.Groenew. & Boekhout, 2015 | Yes. Successful. | ITS 4-5 | KY105835 | 97 | 96 | 0 | attagtatcactcattgacgcaagtcactgagttatatctgctctcttcgcaagaagagggtttccatacacaccgtgaactgtggcttcggccatcacaaactgttagtaatgaatgtaatatcataacaaaaacaaaacttttaacaacggatctcttggctctcgcatcgatgaacaacgcaccgaaatgcgataagtaatgtgaattgcagaattcaatgaatcatcgaatctttgaacgcaccttgcgccctttggtattccgaagggcatgcctgtttgagtgtcatgaaacctcactccacttgggtttttgcctgagtggtagtgtattgggtgttgccttgctaaaggctcgccttaaagatataagcaccttggatgtaatacgtttcatccttctgggtggctgataaccccacatattcatgatctggacct |
| MT802481 | 2880 | *Amylocarpus encephaloides* | Curr. 1859 | Yes. Successful. | ITS 4-5 | MH857920 | 100 | 100 | 0 | cattactgagttcctgccctctgggtagaaacctcaccctgtgttagaaccccatctctgtttccctggcgggccgcccccgggcgccggctctggccggaccgcgcccgtcgagggacctcacaaccctgtctaccagtctgtccgagtactatatcaatagttaaaactttcaacaacggatctcttggctctggcatcgatgaagaacgcagcgaaatgcgataagtaatgtgaattgcagaatttagtgaatcatcgaatctttgaacgcacattgcgcccctcggcattccgaggggcatgcctgtccgagcgtcatatacaaccactccagcctgctgggtcttgggcctcgcctccgggcgggccctaaaatcagtggcggccccgccgggccctgagcgtagtaagttctctcgctacagggccgcggcgggtgctggccagcaaccccatcttttcaatggttgacct |
|  | 2881 |  |  | No. Sequencing failed. |  |  |  |  |  |  |
| MT802482 | 2882 | *Amylocarpus encephaloides* | Curr. 1859 | Yes. Successful. | ITS 4-5 | MH857920 | 100 | 100 | 0 | attactgagttcctgccctctgggtagaaacctcaccctgtgttagaaccccatctctgtttccctggcgggccgcccccgggcgccggctctggccggaccgcgcccgtcgagggacctcacaaccctgtctaccagtctgtccgagtactatatcaatagttaaaactttcaacaacggatctcttggctctggcatcgatgaagaacgcagcgaaatgcgataagtaatgtgaattgcagaatttagtgaatcatcgaatctttgaacgcacattgcgcccctcggcattccgaggggcatgcctgtccgagcgtcatatacaaccactccagcctgctgggtcttgggcctcgcctccgggcgggccctaaaatcagtggcggccccgccgggccctgagcgtagtaagttctctcgctacagggccgcggcgggtgctggccagcaaccccatcttttcaatggttgacct |
|  | 2889 |  |  | No. Sequencing failed. |  |  |  |  |  |  |
| MT802625 | 2890 | *Pyrenochaetopsis leptospora* | (Sacc. & Briard) Gruyter, Aveskamp & Verkley 2010 | Yes. Successful. | ITS 4-5 | MH862744 | 100 | 100 | 0 | cattatcaaaacagcggacttcggtccttgctgcacccttgtcttttgcgtaccgtatgtttcctcggcgggcttgcctgccggttggacaatatcaaacctttttgtagttgcaatcagcgtcagaaaacaaataataattacaactttcaacaacggatctcttggttctggcatcgatgaagaacgcagcgaaatgcgaaaagtagtgtgaattgcagaattcagtgaatcatcgaatctttgaacgcacattgcgccccttggtattccatggggcatgcctgttcgagcgtcattttgtaccctcaagcactgcttggtgttgggcgtttgtcctgcaaaggactcgcctgaaagcgattggcggccaacgtactggtggtagagcgcagcacaatttgcgtctctcccttctacgtcggcgtccatgaagccttattcaaacgtttgacct |
|  | 2891 | *Zalerion maritima* | (Linder) Anastasiou 1963 | Yes. Sequence quality poor. ID based on morphology comparison with similar sequenced cultures. | ITS 4-5 |  |  |  |  |  |
|  | 2892 | *Cadophora luteo-olivacea* | (J.F.H. Beyma) T.C. Harr. & McNew 2003 | Yes. Sequence quality poor. ID based on morphology comparison with similar sequenced cultures. | ITS 4-5 |  |  |  |  |  |
| MT802553 | 2893 | *Fusarium oxysporum* | Schltdl. 1824 | Yes. Successful. | ITS 4-5 | KX263816 | 99 | 100 | 0 | cattaccgagtttacaactccaaacccctgtgaacataccttatgttgcctcggcggatcagcccgcgccccgtaaaacgggacggcccgccgcaggaaccccaaaactctgtttttagtggaacttctgagtaaaaaaacaaataaatcaaaactttcaacaacggatctcttggttctggcatcgatgaagaacgcagcaaaatgcgataagtaatgtgaattgcagaattcagtgaatcatcgaatctttgaacgcacattgcgcccgccagtattctggcgggcatgcctgttcgagcgtcatttcaaccctcaaacccccgggtttggtgttggggatcgggcttttgcttcggcagcccggccccgaaatctagtggcggtctcgctgcagcctccattgcgtagtagctaacacctcgcaactggaacgcggcgcggccaagccgttaaacccccaacttctgaatgttgacct |
| MT802626 | 2894 | *Sarocladium* sp. | W.Gams & D.Hawksw. | Yes. Successful. | ITS 4-5 | MH859780 | 95 | 100 | 0 | cattaaagagaagcttcggctctccacccactgtgaacatacctacgttccctcggcgggctcagcgcgcggtgcctccgggcgccgggcgtccgccgggggcccccaaactcgaatttactacgtgtatctctgaggggcgaaagcctgaaaaaatgaatcaaaactttcaacaacggatctcttggctctggcatcgatgaagaacgcagcgaaatgcgataagtaatgtgaattgcagaattcagtgaatcatcgaatctttgaacgcacattgcgcccgccggcactccggcgggcatgcctgtccgagcgtcatttcaaccctcaggcccacccttccgggggacgggcctggtgttggggctcggggtccgcaaggcccccgtcccctaaattcagtggcggtcgcgccgcagcctcccctgcgtagtagcacacctcgcaccggagagcggcacggccacgccgtgaaacccccaattttaccaaggttgacct |
|  | 2895 | *Zalerion maritima* | (Linder) Anastasiou 1963 | Yes. Sequence quality poor. ID based on morphology comparison with similar sequenced cultures. | ITS 4-5 |  |  |  |  |  |
|  | 2896 | *Zalerion maritima* | (Linder) Anastasiou 1963 | Yes. Sequence quality poor. ID based on morphology comparison with similar sequenced cultures. | ITS 4-5 |  |  |  |  |  |
| MT802582 | 2897 | *Neosetophoma italica* | W.J. Li, Camporesi & K.D. Hyde 2015 | Yes. Successful. | ITS 4-5 | LC206635 | 97 | 100 | 0 | attacattcagtagcttgctactgttagggaggccggttagtctgtatagtatcactactgatgagcagcacggccttctgtctgtacccttgtcttttgcgcactcatgtttcctcggctgggtttacgcccgccggctggacaactctataacctttttaattttcaatcagcgtctgaaaaacctaataattacaactttcaacaacggatctcttggttctggcatcgatgaagaacgcagcgaaatgcgataagtagtgtgaattgcagaattcagtgaatcatcgaatctttgaacgcacattgcgccccttggtattccatggggcatgcctgttcgagcgtcatttgtaccctcaagctctgcttggtgttgggtgtttgtccactccctggtgtttggactcgccttaaagcaattggcagccagtgttttggtattgaagcgcagcacaatttgcgactctagcctagaatacttgcgtccagtaagcctttttccacttttgacct |
| MT802459 | 2898 | *Acremonium* sp. | Link, 1809 | Yes. Successful. | ITS 4-5 | MH859576 | 95 | 100 | 0 | cattacagagtgtaaaactcccaacccctgtgaacttaccagtcgttgcttcggcgggaccgccccgggcaccatcgcgtgccccggaaccaggcgcccgccgggggactcaaactcttattttactttagtggtattctctgagtggctataagcaaaaaaatgaatcaaaactttcaacaacggatctcttggttctggcatcgatgaagaacgcagcgaaatgcgataagtaatgtgaattgcagaattcagtgaatcatcgaatctttgaacgcacattgcgcccgctagtattctggcgggcatgcctgtctgagcgtcatttcaccaatcccctgggcattcgtgtctgggggctgttggggctcgtcgaccgtcctccgggcgggcgccgtcccctaaacttagtggcagcctcgccgcggcctcccctgcgcagtaaacactctcgcaggcggaaccacagcgaaggatcgccgtaaaaccccccaacttcttaatggttgacct |
| MT802556 | 2899 | *Fusarium sporotrichioides* | Sherb. 1915 | Yes. Successful. | ITS 4-5 | MK012401 | 100 | 100 | 0 | cattaccgagtttacaactcccaaacccctgtgaacatacctttatgttgcctcggcggatcagcccgcgccccgtaaaacgggacggcccgccgcaggaaaccctaaactctgtttttagtggaacttctgagtataaaaaacaaataaatcaaaactttcaacaacggatctcttggttctggcatcgatgaagaacgcagcaaaatgcgataagtaatgtgaattgcagaattcagtgaatcatcgaatctttgaacgcacattgcgcccgccagtattctggcgggcatgcctgttcgagcgtcatttcaaccctcaagcccagcttggtgttgggatctgtgtgcaaacacagtccccaaattgattggcggtcacgtcgagcttccatagcgtagtaatttacacatcgttactggtaatcgtcgcggccacgccgttaaaccccaacttctgaatgttgacct |
| MT802583 | 2900 | *Neosetophoma samarorum* | (Desm.) Gruyter, Aveskamp & Verkley 2010 | Yes. Successful. | ITS 4-5 | MH063615 | 99 | 99 | 0 | cattacattcagtagcttgctactgttaggggggtctgttagtctgtatagtattactactgatgagcagcgcgaccctctgtttgtacccttgtcttttgcgcactcatgtttcctcggcgggtttacgcccgccggctggacaactctataacctttttaattttcaatcagcgtctgaaaaacataataattacaactttcaacaacggatctcttggttctggcatcgatgaagaacgcagcgaaatgcgataagtagtgtgaattgcagaattcagtgaatcatcgaatctttgaacgcacattgcgccccttggtattccatggggcatgcctgttcgagcgtcatttgtaccctcaagctctgcttggtgttgggtgtttgtccactccctggtgtttggactcgccttaaagcaattggcagccagtgttttggtattgaagcgcagcacattttgcgattctagcctgaaatactagcatccagcaagtcattttcacttttgacct |
| MT802612 | 2901 | *Penicillium westlingii* | K.W. Zaleski 1927 | Yes. Successful. | ITS 4-5 | MH864318 | 99 | 100 | 0 | attactgagtgagggcccctcggggtccaacctcccacccgtgtttacgaaccttgttgcttcggcgggcccgcctcacggccgccggggggcatttgcccccgggcccgcgcccgccgaagccacctgtgaacgctgtctgaagtatgcagtctgagacaattattaaattaattaaaactttcaacaacggatctcttggttccggcatcgatgaagaacgcagcgaaatgcgataactaatgtgaattgcagaattcagtgaatcatcgagtctttgaacgcacattgcgccctctggtattccggagggcatgcctgtccgagcgtcattgctgccctccagcccggctggtgtgttgggccccgccccccttcccgggggggcgggcccgaaaggcagcggcggcaccgcgtccggtcctcgagcgtatggggctttgtcacccgctcttgtaggcccggccggcgccagccgaccccctcaatctattttttcaggttgacct |
| MT802442 | 2902 | *Parasarocladium breve* | (Sukapure & Thirum.) Summerb., J.A. Scott, Guarro & Crous 2018 | Yes. Successful. | ITS 4-5 | KY081463 | 99 | 100 | 0 | cattatagagtttctactcttcacccctgtgaacttacctattatcctccggcggaacgccccggtgccttcggggccgggtcaggcgcccgccggggaccaaacaaactgtatttgtctcctgtatacctcagaaattggcgtaaagccgaaatgtaacaacttttgacaatggatctcttggcactggcatcgatgaagaacgcagcgaaatgcgataagtaatgtgaattgcagagcacagtgaatcatcgaatctttgaacgcacatggcgcccgccggtaatccggcgggcatgcctgtccgagcgtcatttcaaccctcagaacccctctctcgggagggcgttactggtgttggggaacgagcgccccccgcggcgcccgtcccttaaatctattggcggctccggagtctgtctcccctgcgtagtattgcatctcgctttggtgacttccccgggctgctgtggctctgccacgaaacccccactaggttgacct |
|  | 2903 |  |  | No. Sequencing failed. | ITS 4-5 |  |  |  |  |  |
|  | 2904 |  |  | No. Sequencing failed. | ITS 4-5 |  |  |  |  |  |
| MT802568 | 2905 | *Lulworthia* sp. 1 | G.K.Sutherland, 1916 | Yes. Successful. | ITS 4-5 | NR_178138 | 99 | 100 | 3.00E-152 | cattagtgggaattgcagaactcagtgaatcatcgaatctttgaacgcacattgcgcccgccggcatcccggcgggcatgcctgtccgagcgtcatagcaacccctcgggccgcctcatccactgggtgtggtcggcccggcgttgaagcaccgccaggctcggttagcaccagcccggcgggcctctaaatccagcggcggacgccttctggccacccagcgcagtactacaatcctcgctgcggtggacggacggtcgccctgcccagcgccttgcggcacctataacgtttgacct |
| MT802444 | 2906 | *Acremonium fuci* | Summerb., Zuccaro & W. Gams 2004 | Yes. Successful. | ITS 4-5 | MF186078 | 100 | 100 | 0 | cattactgagtttacaactcccaaacccctgtgaacatacctatgttgcttcggcgggccgtcccgcggcgcgcccacgtggcgtgacccggaaccaggcgcccgccggggacccaaactcttgcctgtatagtgtctcctctgagtggcataagcaaaaataaacaaaactttcagcaacggatctcttggttctggcatcgatgaagaacgcagcgaaatgcgataagtaatgtgaattgcagaattcagtgaatcatcgaatctttgaacgcacattgcgcccgccagtattctggcgggcatgcctgtctgagcgtcatttcaaccctcagcccccgctcgcggggcgctggcgttggggctcggccgtccaccgcggcggccggccccgaaacacagtggcggtctcccgcggactcccctgcgtagtagcactacctcgcagaagggacgagcgggctggccacgccgtaaaaccccccacttctcaaggttgacct |
| MT802634 | 2907 | *Septoriella* sp. | Oudem., 1889 | Yes. Successful. | ITS 4-5 | NR_132926 | 96 | 100 | 0 | cattacaattcagtagcttgctactgtcagaaggcgcgataagcccgtatagtttaattactgatgagcggcagcccttttgtttgtacccttgtcttttgcgcactcatgtttcctcggcgggtctgcccgccgattggacaaaactataaccttttttattttcaatcagcgtctgaaaacaattaataattacaactttcaacaacggatctcttggttctggcatcgatgaagaacgcagcgaaatgcgataagtagtgtgaattgcagaattcagtgaatcatcgaatctttgaacgcacattgcgccccttggtattccatggggcatgcctgttcgagcgtcatttgtaccctcaagctctgcttggtgttgggtgtttgtcctctcctctgcgattggactcgccttaaagcaattggcagccagtgttttggtattgaagcgcagcacattttgcgattctagcctcaatacttgcgtccacaagcctttttataacgcttgacct |
| MT802638 | 2908 | *Vishniacozyma carnescens* | (Verona & Luchetti) Xin Zhan Liu, F.Y. Bai, M. Groenew. & Boekhout 2015 | Yes. Successful. | ITS 4-5 | LC203731 | 99 | 100 | 0 | cattaataatgctctctggcttcggtcagctgagttcaatgagtgccttctcttcggagttggccatccacacacaccgtgaactgtggcttcggccatcacaaactgttagtaatgaatgtaatatcataacaaaaacaaaacttttaacaacggatctcttggctctcgcatcgatgaagaacgcagcgaaatgcgataagtaatgtgaattgcagaattcagtgaatcatcgaatctttgaacgcaccttgcgccctttggtattccgaagggcatgcctgtttgagtgtcatgaaacctcaccccacttgggtttttgcctgagcggtggtgtattgggtgttgccttgccaaaggctcgccttaaaaacataagcaccttggatgtaatacgtttcatccttctgggtggctgataaccccacatattcatgatctggacct |
|  | 2909 | *Zalerion* sp. | R.T.Moore & Meyers, 1962 | Yes. Sequence quality poor. ID based on morphology comparison with similar sequenced cultures. | ITS 4-5 |  |  |  |  |  |
| MT802511 | 2910 | *Neosetophoma cerealis* | (E. Müll.) Crous 2020 | Yes. Successful. | ITS 4-5 | MH861123 | 100 | 100 | 0 | cattacattcagtagcttgctactgttaggggggtctgtcagcctgtatagtatcactactgatgagcagcgcgaccctctgtctgtacccttgtcttttgcgtactcatgtttcctcggcgggtttacacccgccggctggacaactctataacctttttaattttcaatcagcgtctgaaaaacctaataattacaactttcaacaacggatctcttggttctggcatcgatgaagaacgcagcgaaatgcgataagtagtgtgaattgcagaattcagtgaatcatcgaatctttgaacgcacattgcgccccttggtattccatggggcatgcctgttcgagcgtcatttgtaccctcaagctctgcttggtgttgggtgtttgtccactccctggtgtttggactcgccttaaagcaattggcagccagtgttttggtattgaagcgcagcacattttgcgattctagcctgaaatactagcatccagcaagtcatttttcacttttgacct |
| MT802445 | 2911 | *Acremonium fuci* | Summerb., Zuccaro & W. Gams 2004 | Yes. Successful. | ITS 4-5 | MF186078 | 100 | 100 | 0 | attactgagtttacaactcccaaacccctgtgaacatacctatgttgcttcggcgggccgtcccgcggcgcgcccacgtggcgtgacccggaaccaggcgcccgccggggacccaaactcttgcctgtatagtgtctcctctgagtggcataagcaaaaataaacaaaactttcagcaacggatctcttggttctggcatcgatgaagaacgcagcgaaatgcgataagtaatgtgaattgcagaattcagtgaatcatcgaatctttgaacgcacattgcgcccgccagtattctggcgggcatgcctgtctgagcgtcatttcaaccctcagcccccgctcgcggggcgctggcgttggggctcggccgtccaccgcggcggccggccccgaaacacagtggcggtctcccgcggactcccctgcgtagtagcactacctcgcacaagggacgagcgggctggccacgccgtaaaaccccccacttctcaaggttgacct |
| MT802458 | 2912 | *Acremonium rutilum* | W. Gams 1971 | Yes. Successful. | ITS 4-5 | MH859576 | 100 | 100 | 0 | cattacagagtgtaaaaactcccaaacccctgtgaacttaccagtcgttgcttcggcgggatcgccccgggcgccatcgcgtgccccggaaccaggcgcccgccgggggactcaaactcttgttttactttagtggtattctctgagtggctatatgcaaacaaatgaatcaaaactttcaacaacggatctcttggttctggcatcgatgaagaacgcagcgaaatgcgataagtaatgtgaattgcagaattcagtgaatcatcgaatctttgaacgcacattgcgcccgctagtattctggcgggcatgcctgtctgagcgtcatttcaccaatccccctgggcttcttgtcccgggggctgttggggatcgccgagcgtccactcggcgtcccctaaacctagtggcagcctcgccgcggcctcccctgcgtagtaaaacactctcgcaggcggaaccacagcgaagggtcgccgtaaaacccccaacttcttaatggttgacct |
| MT802519 | 2913 | *Didymella segeticola* | (Qian Chen) Qian Chen, Crous & L. Cai 2017 | Yes. Successful. | ITS 4-5 | MG742308 | 100 | 100 | 0 | attacctagagttgcgggctttgcctgccatctcttacccatgtcttttgagtaccttacgtttcctcggcgggtccgcccgccgactggacaatttaaaccacttgcagttgcaatcagcgtctgaaaaaacttaatagttacaactttcaacaacggatctcttggttctggcatcgatgaagaacgcagcgaaatgcgataagtagtgtgaattgcagaattcagtgaatcatcgaatctttgaacgcacattgcgccccttggtattccatggggcatgcctgttcgagcgtcatttgtaccttcaagccttgcttggtgttgggtgtttgtctcgcctctgcgcgtagactcgcctcaaaacaattggcagccggcgtattgatttcggagcgcagtacatctcgcgctttgcactcagaacgacgacgtccaaaagtacatttttacactcttgacct |
| MT802584 | 2914 | *Paradendryphiella salina* | (G.K. Sutherl.) Woudenb. & Crous 2013 | Yes. Successful. | ITS 4-5 | MH857928 | 100 | 100 | 0 | attattcacccatgtcttttgcgcacttcttgtttcctgggcgggttcgcccgccaccaggacccaaccataaacctttttttgtaattgcaatcagcgtcagtaaacaatgtaattattacaactttcaacaacggatctcttggttctggcatcgatgaagaacgcagcgaaatgcgatacgtagtgtgaattgcagaattcagtgaatcatcgaatctttgaacgcacattgcgccctttggtattccaaagggcatgcctgttcgagcgtcatttgtaccctcaagctttgcttggtgttgggcgtctttgtctctcacgagactcgccttaaaatgattggcagccggcctactggtttcggagcgcagcacaatcttgcacttctgatcagccatggttgagcatccatcaagaccacatttttctcacttttgacct |
| MT802640 | 2915 | *Vishniacozyma victoriae* | (M.J. Montes, Belloch, Galiana, M.D. García, C. Andrés, S. Ferrer, Torr.-Rodr. & J. Guinea) Xin Zhan Liu, F.Y. Bai, M. Groenew. & Boekhout 2015 | Yes. Successful. | ITS 4-5 | KY105833 | 98 | 100 | 0 | attaatagtgctcattgacgcaagtcagtgagttagatctgctctcttcgcaagaagagggtttccatacacaccgtgaactgtggcttcggccatcacaaactgttagtaatgaatgtaatatcataacaaaaacaaaacttttaacaacggatctcttggctctcgcatcgatgaagaacgcagcgaaatgcgataagtaatgtgaattgcagaattcagtgaatcatcgaatctttgaacgcaccttgcgccctttggtattccgaagggcatgcctgtttgagtgtcatgaaacctcactccacttgggtttttgcctgagtggtagtgtattgggtgttgccttgctaaaggctcgccttaaagatataagcaccttggatgtaatacgtttcatccttctgggtggctgataaccccacatattcatgatctggacct |
|  | 2916 |  |  | No. Sequencing failed. |  |  |  |  |  |  |
| MT802636 | 2917 | *Tolypocladium* sp. | W. Gams 1971 | Yes. Successful. | ITS 4-5 | MG228381 | 96 | 99 | 0 | cattgttaccaataactcccaacccctgtgaacatactctacgttgcttcggcgggaccgccccggcgccctcggcgtcccggaaccaggcgcccgccggaggacccaaactcttgtttaaaccatagtggcatattctgagtctcacaagaaaaatgaatcaaaactttcaacaacggatctcttggctctggcatcgatgaagaacgcagcgaaatgcgataagtaatgtgaattgcagaattcagtgaatcatcgaatctttgaacgcacattgcgcccgccagtattctggcgggcatgcctgttcgagcgtcatttcaaccctcaagccccagccggcttggtgttggggaccggccccggccgccccccaaatgcagtggcgacct |
| MT802480 | 2918 | *Akanthomyces muscarius* | (Petch) Spatafora, Kepler & B. Shrestha 2017 | Yes. Successful. | ITS 4-5 | MH858368 | 99 | 99 | 0 | cattatcgagtttacaactcccaaccctatgtgaacatacctatcgttgcttcggcggactcgccccggcgtccggacggcctcgcgccgcccgcggcccggacccaggcggccgccggagaccctcaaactctgtattatcagcatcttctgaatacgccgcanggcaaaacaaatgaatcaaaactttcaacaacggatctcttggttctggcatcgatgaagaacgcagcgaaatgcgataagtaatgtgaattgcagaattcagtgaatcatcgaatctttgaacgcacattgcgcccgccagcattctggcgggcatgcctgttcgagcgtcatttcaaccctcgacttccctttggggaaatcggcgttggggaacggcagcataccgccggccccgaaatggagtggcggcccgtccgcggcgacct |
|  | 2919 |  |  | No. Sequencing failed. | ITS 4-5 |  |  |  |  |  |
| MT802446 | 2920 | *Acremonium fuci* | Summerb., Zuccaro & W. Gams 2004 | Yes. Successful. | ITS 4-5 | MF186078 | 99 | 100 | 0 | cattactgagtttacaactccaaacccctgtgaacatacctatgttgcttcggcgggccgtcccgcggcgcgcccacgtggcgtgacccggaaccaggcgcccgccggggacccaaactcttgcctgtatagtgtctcctctgagtggcataagcaaaaataaacaaaactttcagcaacggatctcttggttctggcatcgatgaagaacgcagcgaaatgcgataagtaatgtgaattgcagaattcagtgaatcatcgaatctttgaacgcacattgcgcccgccagtattctggcgggcatgcctgtctgagcgtcatttcaaccctcagcccccgctcgcggggcgctggcgttggggctcggccgtccaccgcggcggccggccccgaaacacagtggcggtctcccgcggactcccctgcgtagtagcactacctcgcagaagggacgagcgggctggccacgccgtaaaaccccccacttctcaaggttgacct |
|  | 2921 | *Mortierella* sp. | Coem., 1863 | Yes. Sequence quality poor. | ITS 4-5 |  |  |  |  |  |
| MT802503 | 2922 | *Cladosporium herbarum* | (Pers.) Link 1816 | Yes. Successful. | ITS 4-5 | MH864758 | 100 | 100 | 0 | cattacagaacgcccgggcttcggcctggttattcataaccctttgttgtccgactctgttgcctccggggcgaccctgccttcgggcgggggctccgggtggacacttcaaactcttgcgtaactttgcagtctgagtaaacttaattaataaattaaaacttttaacaacggatctcttggttctggcatcgatgaagaacgcagcgaaatgcgataagtaatgtgaattgcagaattcagtgaatcatcgaatctttgaacgcacattgcgccccctggtattccggggggcatgcctgttcgagcgtcatttcaccactcaagcctcgcttggtattgggcaacgcggtccgccgcgtgcctcaaatcgtccggctgggtcttctgtcccctaagcgttgtggaaactattcgctaaagggtgttcgggaggctacgccgtaaaacaaccccatttctaaggttgacct |
| MT802616 | 2923 | *Phaeosphaeria halima* | (T.W. Johnson) Shoemaker & C.E. Babc. 1989 | Yes. Successful. | ITS 4-5 | AF422966 | 99 | 100 | 0 | attactataaggcatgaatatttagttagagtgcttctcggctattattcaaacctttactctaccttgactttttgcgtattctgtttccttggtaggcttgcctgccaattggacaaaatcataacccttttaatatttaatcagcgtctgaataattttaataattacaactttcaacaacggatctcttggttctggcatcgatgaagaacgcagcgaaatgcgataagtagtgtgaattgcagaattcagtgaatcatcgaatctttgaacgcacattgcgccccttggtattccatggggcatgcctgttcgagcgtcatttgtaatctcaagctatgcttggtgttgggtacttgtcttagctaagcctaaagacttgccttaaatatattggcagccagtattttggtttgaatgtgcagcacagcgcctcaagctattaaacacgggcaaccataagaaattataactcttttgacct |
|  | 2924 | *Diatrypella* sp. | (Ces. & De Not.) De Not., 1863 | Yes. Sequence quality poor. | ITS 4-5 |  |  |  |  |  |
| MT802617 | 2925 | *Phaeosphaeria halima* | (T.W. Johnson) Shoemaker & C.E. Babc. 1989 | Yes. Successful. | ITS 4-5 | AF422966 | 99 | 100 | 0 | attattcaaacctttactctaccttgactttttgcgtattctgtttccttggtaggcttgcctgccaattggacaaaatcataacccttttaatatttaatcagcgtctgaataattttaataattacaactttcaacaacggatctcttggttctggcatcgatgaagaacgcagcgaaatgcgataagtagtgtgaattgcagaattcagtgaatcatcgaatctttgaacgcacattgcgccccttggtattccatggggcatgcctgttcgagcgtcatttgtaatctcaagctatgcttggtgttgggtacttgtcttagctaagcctaaagacttgccttaaatatattggcagccagtattttggtttgaatgtgcagcacagcgcctcaagctattaaacacgggcaaccataagaaattataactcttttgacct |
|  | 2926 |  |  | No. Sequencing failed. |  |  |  |  |  |  |
|  | 2927 |  |  | No. Sequencing failed. |  |  |  |  |  |  |
|  | 2928 |  |  | No. Sequencing failed. |  |  |  |  |  |  |
|  | 2929 | *Cadophora* sp. | Lagerb. & Melin, 1927 | Yes. Sequence quality poor. ID based on morphology comparison with similar sequenced cultures. | ITS 4-5 |  |  |  |  |  |
| MT802606 | 2930 | *Parasarocladium* sp. | Summerb., J.A.Scott, Guarro & Crous, 2018 | Yes. Successful. | ITS 4-5 | KY081463 | 95 | 100 | 0 | cattatagagtttctactcttctacccatgtgaacttaccttactatcctccggcggaacgccccggtgccttcgggcccggatcaggcgcccgccggggaacaaacaaactgtatttgtctcctgtatacctcagaaactggcgtaaagccgaaatgtaacaacttttgacaatggatctcttggcactggcatcgatgaagaacgcagcgaaatgcgataagtaatgtgaattgcagagcacagtgaatcatcgaatctttgaacgcacatggcgcccgccggtaatccggcgggcatgcctgtccgagcgtcatttcaaccctcagaacccctctcttacgggagggcgttactggtgttggggaacgagcgtccaccgcggcgcccgtcccttaaatctattggcggctccggagtctgtctcccctgcgtagtattgcatctcgctttggtgacttcttcgggctgctgcggcctctggctgcgaaacccccactaggttgacct |
| MT802504 | 2931 | *Cladosporium herbarum* | (Pers.) Link 1816 | Yes. Successful. | ITS 4-5 | MH864758 | 99 | 100 | 0 | cattaaagaacgcccgggcttcggcctggttattcataaccctttgttgtccgactctgttgcctccggggcgaccctgccttcgggcgggggctccgggtggacacttcaaactcttgcgtaactttgcagtctgagtaaacttaattaataaattaaaacttttaacaacggatctcttggttctggcatcgatgaagaacgcagcgaaatgcgataagtaatgtgaattgcagaattcagtgaatcatcgaatctttgaacgcacattgcgccccctggtattccggggggcatgcctgttcgagcgtcatttcaccactcaagcctcgcttggtattgggcaacgcggtccgccgcgtgcctcaaatcgtccggctgggtcttctgtcccctaagcgttgtggaaactattcgctaaagggtgttcgggaggctacgccgtaaaacaaccccatttctaaggttgacct |
|  | 2932 |  |  | Yes. Successful. | ITS 4-5 |  |  |  |  |  |
| MT802628 | 2933 | *Sarocladium strictum* | (W. Gams) Summerb. 2011 | Yes. Successful. | ITS 4-5 | MH864442 | 100 | 100 | 0 | cattaccagagtgccctaggctctccaacccattgtgaacttaccaaacgttccctcggcgggctcagcgcgcggtggcctccgggcctccgggcgtccgccggggaaaaccaaaccctgatttaatcgtatttctctgaggggcgaaagcccgaaaacaaaatgaatcaaaactttcaacaacggatctcttggctctggcatcgatgaagaacgcagcgaaatgcgataagtaatgtgaattgcagaattcagtgaatcatcgaatctttgaacgcacattgcgcccgccggcactccggcgggcatgcctgtccgagcgtcatttcaaccctcaggcccacccttccgggggagcgggcctggttctggggatcggcggccctcgcggcccccgtccctcaaattcagtggcggtcgcgccgcagcctcccctgcgtagtagcacaacctcgcaccggagagcggaacgaccacgccgtaaaacacccaattttttaaggttgacct |
|  | 2934 |  |  | No. Sequencing failed. |  |  |  |  |  |  |
| MT802557 | 2936 | *Fusarium sporotrichioides* | Sherb. 1915 | Yes. Successful. | ITS 4-5 | MK01240 | 100 | 99 | 0 | cattaccgagattacaactcccaaacccctgtgaacatacctttatgttgcctcggcggatcagcccgcgccccgtaaaacgggacggcccgccgcaggaaaccctaaactctgtttttagtggaacttctgagtataaaaaacaaataaatcaaaactttcaacaacggatctcttggttctggcatcgatgaagaacgcagcaaaatgcgataagtaatgtgaattgcagaattcagtgaatcatcgaatctttgaacgcacattgcgcccgccagtattctggcgggcatgcctgttcgagcgtcatttcaaccctcaagcccagcttggtgttgggatctgtgtgcaaacacagtccccaaattgattggcggtcacgtcgagcttccatagcgtagtaatttacacatcgttactggtaatcgtcgcggccacgccgttaaaccccaacttctgaatgttgacct |
|  | 2937 |  |  | No. Sequencing failed. |  |  |  |  |  |  |
|  | 2938 |  |  | No. Sequencing failed. |  |  |  |  |  |  |
| MT802571 | 2939 | *Metapochonia suchlasporia* | (W. Gams & Dackman) Kepler, S.A. Rehner & Humber 2014 | Yes. Successful. | ITS 4-5 | MG813181 | 100 | 99 | 0 | attaccgagatttctactcccaacccctgtgaacttatacctttaccgttgcttcggcgggttaacgccccggaaaggcccccgaaagggagccgccccggaaccaggcgcccgccgggggacccaaactcttgtattttcttacctagcatgtctgagtggaatcataaacaaatgaatcaaaactttcaacaacggatctcttggttctggcatcgatgaagaacgcagcgaaatgcgataagtaatgtgaattgcagaattcagtgaatcatcgaatctttgaacgcacattgcgcccgccagtattctggcgggcatgcctgttcgagcgtcatttcaaccctcaagccccagcggcctggtgttggggaccggcgacctcgcccgagcccgccctccggggcgcgtgcccggtgcgtccgccgcccccgaaatgaattggcggcctcgtcgcggcctcctctgcgtagtagcacaacctcgcaagcgggagcgcgacgcggccactgccgtaaaacgcccaacttttttagagttgacct |
| MT802529 | 2940 | *Epicoccum nigrum* | Link 1816 | Yes. Successful. | ITS 4-5 | MH860625 | 100 | 100 | 0 | attacctagagtttgtagacttcggtctgctacctcttacccatgtcttttgagtaccttcgtttcctcggcgggtccgcccgccgattggacaacattcaaaccctttgcagttgcaatcagcgtctgaaaaaacataatagttacaactttcaacaacggatctcttggttctggcatcgatgaagaacgcagcgaaatgcgataagtagtgtgaattgcagaattcagtgaatcatcgaatctttgaacgcacattgcgccccttggtattccatggggcatgcctgttcgagcgtcatttgtaccttcaagctctgcttggtgttgggtgtttgtctcgcctctgcgtgtagactcgccttaaaacaattggcagccggcgtattgatttcggagcgcagtacatctcgcgctttgcactcacaacgacgacgtccaaaagtacatttttacactcttgacct |
| MT802605 | 2941 | *Paraphaeosphaeria* sp. | O.E.Erikss., 1967 | Yes. Successful. | ITS 4-5 | MH633960 | 100 | 98 | 2.00E-168 | cattacctgttctgatacaaataatcataacaactttcaacaatggatctcttggctctggcatcaatgaataacgcatcgaaatgctataagtagtgtgaattgcagaattcagtgaatcatctaatctttgaacgcacattgcgccccttggtattccatggggcatgcctgttcgagcgtcatctacaccctcaagctctgcttggtgttgggcgtctgtcccgcctctgcgcgcggactcgccccaaattcattggcaacggtctttgcctcctctcgcgcagcacaattgcgtctgcgggggggcgtggcccgcgtccacgaagcaacattaccgtctttgacct |
| MT802604 | 2942 | *Paraphaeosphaeria neglecta* | Verkley, Riccioni & Stielow 2014 | Yes. Successful. | ITS 4-5 | MG813209 | 100 | 100 | 0 | cattacctgttctgatacaaataatcgttacaactttcaacaatggatctcttggctctggcatcgatgaagaacgcagcgaaatgcgataagtagtgtgaattgcagaattcagtgaatcatcgaatctttgaacgcacattgcgccccttggtattccatggggcatgcctgttcgagcgtcatctacaccctcaagctctgcttggtgttgggcgtctgtcccgcctctgcgcgcggactcgccccaaattcattggcagcggtctttgcctcctctcgcgcagcacaattgcgtctgcgggggggcgtggcccgcgtccacgaagcaacattaccgtctttgacct |
| MT802532 | 2943 | *Fusarium avenaceum* | (Fr.) Sacc. 1886 | Yes. Successful. | ITS 4-5 | JN689961 | 99 | 98 | 0 | cattacactcccaacccctgtgaacataccttaatgttgcctcagtggatcagcccgcgccccgtaaaacgggacggcccgccagaggacccaaactctactgtttcttattgaaacttctgagtaaaacaaacaaataaatcaaaactttcaacaatggatctcttggttctggcatcgatgaagaacgcaacaaaatgcgataagtaatgtgaattgcagaattcagtgaatcatcgaatctttgaacgcacattgcgcccgctggtattccagcggttatgcctgttcgagcgtcatttcaaccctcaagcccccggatttggtgttggggatcggctctgccttctggcggtgccgcccccgaaatacattggcggtctcgctgcagcctccattgcgtagtagctaacacctcgcaactggaacgcggcgcggtcatgccgtaaaaccccaacttctgaatgttgacct |
| MT802510 | 2944 | *Cladosporium ramotenellum* | K. Schub., Zalar, Crous & U. Braun 2007 | Yes. Successful. | ITS 4-5 | MK111448 | 100 | 99 | 0 | cattacagtgaccccggctacggccgggatgttcataaccctttgttgtccgactctgttgcctccggggcgaccctgccttcgggcgggggctccgggtggacacttcaaactcttgcgtaactttgcagtctgagtaaacttaattaataaattaaaacttttaacaacggatctcttggttctggcatcgatgaagaacgcagcgaaatgcgataagtaatgtgaattgcagaattcagtgaatcatcgaatctttgaacgcacattgcgccccctggtattccggggggcatgcctgttcgagcgtcatttcaccactcaagcctcgcttggtattgggcaacgcggtccgccgcgtgcctcaaatcgtccggctgggtcttctgtcccctaagcgttgtggaaactattcgctaaagggtgttcgggaggctacgccgtaaaacaaccccatttctaaggttgacct |
| MT802585 | 2945 | *Paradendryphiella salina* | (G.K. Sutherl.) Woudenb. & Crous 2013 | Yes. Successful. | ITS 4-5 | MH857928 | 100 | 100 | 0 | cattacacaatatgaaagcgggttgggacctcatctcggtgggggctccagcttgtctgaattattcacccatgtcttttgcgcacttcttgtttcctgggcgggttcgcccgccaccaggacccaaccataaacctttttttgtaattgcaatcagcgtcagtaaacaatgtaattattacaactttcaacaacggatctcttggttctggcatcgatgaagaacgcagcgaaatgcgatacgtagtgtgaattgcagaattcagtgaatcatcgaatctttgaacgcacattgcgccctttggtattccaaagggcatgcctgttcgagcgtcatttgtaccctcaagctttgcttggtgttgggcgtctttgtctctcacgagactcgccttaaaatgattggcagccggcctactggtttcggagcgcagcacaatcttgcacttctgatcagccatggttgagcatccatcaagaccacatttttctcacttttgacct |
| MT802641 | 2946 | *Vishniacozyma victoriae* | (M.J. Montes, Belloch, Galiana, M.D. García, C. Andrés, S. Ferrer, Torr.-Rodr. & J. Guinea) Xin Zhan Liu, F.Y. Bai, M. Groenew. & Boekhout 2015 | Yes. Successful. | ITS 4-5 | MG589174 | 100 | 100 | 0 | attaatagtgccctctgatgcaaatcattgggttagatctgctctcttcgcaagaagagggtttccatacacaccgtgaactgtggcttcggccatcacaaactgttagtaatgaatgtaatatcataacaaaaacaaaacttttaacaacggatctcttggctctcgcatcgatgaagaacgcagcgaaatgcgataagtaatgtgaattgcagaattcagtgaatcatcgaatctttgaacgcaccttgcgccctttggtattccgaagggcatgcctgtttgagtgtcatgaaacctcaccccacttgggtttttgcctgagcggtggtgtattgggtgttgccttgctaaaggctcgccttaaagacataagcaccttggatgtaatacgtttcatccttctgggtggctgataaccccacatattcatgatctggacct |
|  | 2947 |  |  | No. Sequencing failed. |  |  |  |  |  |  |
|  | 2948 |  |  | No. Sequencing failed. |  |  |  |  |  |  |
| MT802562 | 2961 | *Cordyceps farinosa* | (Holmsk.) Kepler, B. Shrestha & Spatafora 2017 | Yes. Successful. | ITS 4-5 | DQ888729 | 100 | 99 | 0 | cattccgagttttcactcccaaacccttttgtgaacatacctatcgttgcttcggcggactcgccccagcgtccggccggccccgcgccggccgcggcctggatccaggcggccgccggagacccccaaactctgtattctcagtatcttctgaatccgccgcaaggcaaaacaaatgaatcaaaactttcaacaacggatctcttggttctggcatcgatgaagaacgcagcgaaatgcgataagtaatgtgaattgcagaattcagtgaatcatcgaatctttgaacgcacattgcgcccgccagcattctggcgggcatgcctgttcgagcgtcatttcaaccctcgacttccctttggggaaatcggcgttggggaccggccgtataccgccggccccgaaatgaagtggcggcccgtccgcggcgacctctgcgtagtaatccaactcgcaccggaaccccgacgtggccacgccgtaaaacccccgacttctgaacgttgacct |
|  | 2962 |  |  | No. Sequencing failed. |  |  |  |  |  |  |
| MT802508 | 2963 | *Cladosporium herbarum* | (Pers.) Link 1816 | Yes. Successful. | ITS 4-5 | MH864758 | 100 | 100 | 0 | cattacagaacgcccgggcttcggcctggttattcataaccctttgttgtccgactctgttgcctccggggcgaccctgccttcgggcgggggctccgggtggacacttcaaactcttgcgtaactttgcagtctgagtaaacttaattaataaattaaaacttttaacaacggatctcttggttctggcatcgatgaagaacgcagcgaaatgcgataagtaatgtgaattgcagaattcagtgaatcatcgaatctttgaacgcacattgcgccccctggtattccggggggcatgcctgttcgagcgtcatttcaccactcaagcctcgcttggtattgggcaacgcggtccgccgcgtgcctcaaatcgtccggctgggtcttctgtcccctaagcgttgtggaaactattcgctaaagggtgttcgggaggctacgccgtaaaacaaccccatttctaaggttgacct |
| MT802629 | 2964 | *Sarocladium strictum* | (W. Gams) Summerb. 2011 | Yes. Successful. | ITS 4-5 | MH864442 | 100 | 100 | 0 | cattgtgaacttaccaaacgttccctcggcgggctcagcgcgcggtggcctccgggcctccgggcgtccgccggggaaaaccaaaccctgatttaatcgtatttctctgaggggcgaaagcccgaaaacaaaatgaatcaaaactttcaacaacggatctcttggctctggcatcgatgaagaacgcagcgaaatgcgataagtaatgtgaattgcagaattcagtgaatcatcgaatctttgaacgcacattgcgcccgccggcactccggcgggcatgcctgtccgagcgtcatttcaaccctcaggcccacccttccgggggagcgggcctggttctggggatcggcggccctcgcggcccccgtccctcaaattcagtggcggtcgcgccgcagcctcccctgcgtagtagcacaacctcgcaccggagagcggaacgaccacgccgtaaaacacccaattttttaaggttgacct |
| MT802513 | 2965 | *Corollospora* sp. | Werderm. 1922 | Yes. Successful. | ITS 4-5 | KF916001 | 99.65 | 100 | 0 | cattagcgagtctcagcactccaaacactgcgaaccgtcccgtgccggcgccgttgcttcggcgggcggggcaggtcgccgtccacctcggtgggcggccctgcccgctccatcagaaggggggggacgcccccccggacgctggaacgcccgccggcggtgccaaaccttctgtatttatagcggccttcacactgagtggtactgcaagcaagcaaaaaaaaaactttcaacaacggatctcttggctctggcatcgatgaaaaacgcagcgaaatgcgataagtaatgcgaattgcagatttcagtgaatcatcgaatttttgaacgcacattgcacccggcggccattccgccgggtctgcctgttcgagcgtcgtttctcccctcgagacccccgggactcggtgttggggatctgcagggcccccacgggcgctgcagtccctgaaattcagtggcgggacatgctggaggccccctgcgcagtaaccaaatctcgcatcgggtgccggcgtgccctggccgtcaaccggtcggtgccccaggtgccgtccacagaacagtcgacct |
| MT802642 | 2966 | *Volutella ciliata* | (Alb. & Schwein.) Fr. 1832 | Yes. Successful. | ITS 4-5 | MH892587 | 100 | 99 | 0 | cattaccgagttttcactcccaaacccctgtgaacataccaatcgttgcctcggcgggagagccccgggcgttggcgaaagcctcgcaccggtatcaggcgcccgccggaggacccaaacaaactcttgaattctaaagtatcttctgagtaatataagttaaataaattaaaactttcaacaacggatctcttggttctggcatcgatgaagaacgcagcgaaatgcgataagtaatgtgaattgcagaattcagtgaatcatcgaatctttgaacgcacattgcgcccgccagtattctggcgggcatgcctgttcgagcgtcatttcaaccctcaagcccagcttggtgttggggatcggcacaggcgccctcgggcgcccgccgtcccctaaatctagtggcggtcccgctgcagcctcctctgcgtagtagttttctcctcgcaagggcagctcggtggcgacctcgccgtaaaacccccaacttctgaaaggttgacct |
| MT802623 | 2967 | *Pringsheimia* sp. | Schulzer | Yes. Successful. | ITS 4-5 | NR_145344 | 91.63 | 100 | 0 | cattaatttcggtagtttactactgtttgagggaagtggaaacttttcaggcctccctgaactgaagtacacttcttttcttaacccttgactttttgcgcactcatgtttcctcggcaggcctgcctgccgtttggacacttctataaccttttgaatcttcaatcagcgtctgaataacattaataattacaactttcaacaacggatctcttggttctggcatcgatgaagaacgcagcgaaatgcgataagtagtgtgaattgcagaattcagtgaatcatcgaatctttgaacgcacattgcgccccttggtattccatggggcatgcctgttcgagcgtcatttgtactctcaagctttgcttggtgttgggcgatttgtctctgctatgcccagactcgccttaaatacattggcagccgatattttggtttgaagcgcagcacaattgcaattcgggcttgtgaatatcagcatccatcaaggtaatgcaacactttgacct |
| MT802630 | 2973 | *Sarocladium strictum* | (W. Gams) Summerb. 2011 | Yes. Successful. | ITS 4-5 | MK460826 | 100 | 100 | 0 | cattaccagagtgccctaggctctccaacccattgtgaacttaccaaacgttccctcggcgggctcagcgcgcggtggcctccgggcctccgggcgtccgccggggaaaaccaaaccctgatttaatcgtatttctctgaggggcgaaagcccgaaaacaaaatgaatcaaaactttcaacaacggatctcttggctctggcatcgatgaagaacgcagcgaaatgcgataagtaatgtgaattgcagaattcagtgaatcatcgaatctttgaacgcacattgcgcccgccggcactccggcgggcatgcctgtccgagcgtcatttcaaccctcaggcccacccttccgggggagcgggcctggttctggggatcggcggccctcgcggcccccgtccctcaaattcagtggcggtcgcgccgcagcctcccctgcgtagtagcacaacctcgcaccggagagcggaacgaccacgccgtaaaacacccaattttttaaggttgacct |
| MT802622 | 2974 | *Pilidium* sp. | Kunze | Yes. Successful. | ITS 4-5 | MG212519 | 100 | 96 | 0 | CATTACTGACCATGTGGAAACACAATCTCCCTTTCTTGTTGTTTGACCGGTTGCCTTGCCTTCGGGCAGGATTATTCTGAATCAGTGTCGTCTGAGTACTTTTATAATACTATAAAACTTTCAACAACGGATCTCTTGGTTCTGGCATCGATGAAGAACGCAGCGAAATGCGATAAGTAATGTGAATTGCAGACACCGTGAATCATCGAATCTTTGAACGCACATTGCGCCCTTTGGTATTCCGAAGGGCATGCCTGTTCGAGCGTCATTACACTATTCTTCGGAGTATTGACAGTGGCTTACGCCTTGTCTAAAACCCTTGGTGGTAACTATCAATCACGCATAGTAATCTCTGCGAAGGTGGATAGGTAAACACTGAAAACTTCTTGTTTGACCT |
| MT802575 | 2975 | *Neoascochyta paspali* | (P.R. Johnst.) Qian Chen & L. Cai 2015 | Yes. Successful. | ITS 4-5 | MK012408 | 99.57 | 100 | 0 | attaccgagagttgtaggcttctgtctccatctcttacccatgtcttttgcgtactacacgtttcctcggcaggtccgcctgccgttaggacaatttaaaccatttgcagttgcagtcagcgtctgaaaaacttaataattacaacttttaacaacggatctcttggttctggcatcgatgaagaacgcagcgaaatgcgataagtagtgtgaattgcagaattcagtgaatcatcgaatctttgaacgcacattgcgccccttggtattccatggggcatgcctgttcgagcgtcatttgtaccttcaagctctgcttggtgttgggtgtttgtcccgcctctgtgcgtggactcgccttaaagcaattggcagccgacgtattgtttcggagcgcagcacaaattgcgctttgtagctattacgacagcatccatcaagccttttttcacgcttgacct |
| MT802500 | 2976 | *Cladosporium allicinum* | (Fr.) Bensch, U. Braun & Crous 2012 | Yes. Successful. | ITS 4-5 | MH567100 | 100 | 99 | 0 | cattaaagaacgcccgggcttcggcctggttattcataaccctttgttgtccgactctgttgcctccggggcgaccctgccttcgggcgggggctccgggtggacacttcaaactcttgcgtaactttgcagtctgagtaaacttaattaataaattaaaacttttaacaacggatctcttggttctggcatcgatgaagaacgcagcgaaatgcgataagtaatgtgaattgcagaattcagtgaatcatcgaatctttgaacgcacattgcgccccctggtattccggggggcatgcctgttcgagcgtcatttcaccactcaagcctcgcttggtattgggcaacgcggtccgccgcgtgcctcaaatcgtccggctgggtcttctgtcccctaagcgttgtggaaactattcgctaaagggtgttcgggaggctacgccgtaaaacaaccccatttctaaggttgacct |
| MT802463 | 2977 | *Alternaria arborescens* | E.G. Simmons 1999 | Yes. Successful. | ITS 4-5 | MG208002 | 100 | 99 | 0 | cattacacaaatatgaaggcgggctggaacctctcggggtacagccttgctgaattattcacccttgtcttttgcgtacttcttgtttccttggtgggttcgcccaccactaggacaaacataaaccttttgtaattgcaatcagcgtcagtaacaaattaataattacaactttcaacaacggatctcttggttctggcatcgatgaagaacgcagcgaaatgcgataagtagtgtgaattgcagaattcagtgaatcatcgaatctttgaacgcacattgcgccctttggtattccaaagggcatgcctgttcgagcgtcatttgtaccctcaagctttgcttggtgttgggcgtcttgtctctagctttgctggagactcgccttaaagtaattggcagccggcctactggtttcggagcgcagcacaagtcgcactctctatcagcaaaggtctagcatccattaagccttttttcaacttttgacct |
| MT802586 | 2978 | *Paradendryphiella salina* | (G.K. Sutherl.) Woudenb. & Crous 2013 | Yes. Successful. | ITS 4-5 | MH857928 | 100 | 100 | 0 | cattacacaatatgaaagcgggttgggacctcatctcggtgggggctccagcttgtctgaattattcacccatgtcttttgcgcacttcttgtttcctgggcgggttcgcccgccaccaggacccaaccataaacctttttttgtaattgcaatcagcgtcagtaaacaatgtaattattacaactttcaacaacggatctcttggttctggcatcgatgaagaacgcagcgaaatgcgatacgtagtgtgaattgcagaattcagtgaatcatcgaatctttgaacgcacattgcgccctttggtattccaaagggcatgcctgttcgagcgtcatttgtaccctcaagctttgcttggtgttgggcgtctttgtctctcacgagactcgccttaaaatgattggcagccggcctactggtttcggagcgcagcacaatcttgcacttctgatcagccatggttgagcatccatcaagaccacatttttctcacttttgacct |
| MT802476 | 2979 | *Alternaria phragmospora* | Emden 1970 | Yes. Successful. | ITS 4-5 | JQ796758 | 100 | 100 | 0 | cattacacaatatgaaggcgggctggatacccccagcagtgcgttgcttcgcggcgtgcgctgttgggccggccttgctgaattattcacccgtgtcttttgcgtacttcttgtttccttggtgggctcgcccaccataggacaaccccaataaacctttttgtaatagcaatcagcgtcagtaacaatgtaataattacaactttcaacaacggatctcttggttctggcatcgatgaagaacgcagcgaaatgcgatacgtagtgtgaattgcagaattcagtgaatcatcgaatctttgaacgcacattgcgccctttggtattccaaagggcatgcctgttcgagcgtcatttgtaccctcaagctttgcttggtgttgggcgtcttgtctctagttcgctggagactcgccttaaagtcattggcagccggcctactggtttcggagcgcagcacaagtcgcgctctcttccagccaaggtcagcgtccagtaagcctttttttcaacttttgacct |
| MT802497 | 2980 | *Chalastospora cetera* | (E.G. Simmons) E.G. Simmons 2007 | Yes. Successful. | ITS 4-5 | FJ839607 | 100 | 98 | 0 | cattacacaatacgaaggcgggctggacaccccccgctgggcactgcttcacggcgtgcgcggcggggccggccctgctgaactattcacccgtgtcttttgcgtacctcttgtttcctgggcgggctcgcccgccaccaggaccaaccacaaacctttttgtaatagcaatccgcgtcagtaacaacgtaattaattacaactttcaacaacggatctcttggttctggcatcgatgaagaacgcagcgaaatgcgatacgtagtgtgaattgcagaattcagtgaatcatcgaatctttgaacgcacattgcgccctttggtattccaaagggcatgcctgttcgagcgtcatttgtaccctcaagctttgcttggtgttgggcgtcttttgtctccagctcgctggagactcgccttaaagtcattggcagccggcctactggtttcggagcgcagcacaagtcgcgctctcttccagccaaggtcagcgtccagcaagcctttttttcaacctttgacct |
|  | 2981 |  |  | No. Sequencing failed. |  |  |  |  |  |  |
| MT802569 | 2982 | *Lulworthia* sp. 2 | G.K.Sutherland, 1916 | Yes. Successful. | ITS 4-5 | KU214534 | 99.79 | 100 | 0 | cattccgagttgcaaactcccaaacccttctgtggacctcttaaacgttgcctcggcgggctcgcccgccgctggccaaccataaaaaccatcgctagacgtacatctgagtggacaatataaaataagtcaaaactttcagcaacggatctcttggctctggcatcgatgaagaacgcagcgaaatgcgatacgtaatgtgaattgcagaattcagtgaatcatcgaatctttgaacgcacattgcgcctgccggtattccggcgggcatgcctgtccgagcgtcattaaaacccctcgggcccacctctcgcgaggcaggcccggcgttggggcaccggcagacctcgcggtcccccgggccctcaaattcagtggcggacgcccccacgagcctcccagcgcagtagctcactcgctgacggagcgccggcggagcgcctcgcctcgacgacccatacgagtttgacct |
| MT802554 | 2983 | *Fusarium palustre* | W.H. Elmer & Marra 2021 | Yes. Successful. | ITS 4-5 | MH864236 | 100 | 100 | 0 | cattaccgagtttacaactcccaaacccctgtgaacatacctttatgttgcctcggcggatcagcccgcgccccgtaaaacgggacggcccgccgcaggaaaccctaaactctgtttttagtggaacttctgagtataaaaaacaaataaatcaaaactttcaacaacggatctcttggttctggcatcgatgaagaacgcagcaaaatgcgataagtaatgtgaattgcagaattcagtgaatcatcgaatctttgaacgcacattgcgcccgccagtattctggcgggcatgcctgttcgagcgtcatttcaaccctcaagcccagcttggtgttgggatctgtcttcactgacagtcctcaaattgattggcggtcacgtcgagcttccatagcgtagtaatttacacatcgttactggtaatcgtcgcggccacgccgttaaaccccaacttctgaatgttgacctcggatcaggtaggaatacccgctgaact |
| MT802465 | 2984 | *Alternaria chlamydospora* | Mouch. 1973 | Yes. Successful. | ITS 4-5 | MG020753 | 100 | 99 | 0 | cattacacaatatgaaggcgggctggatacccccagcagtgcgttgcttcgcggcgtgcgctgttggggccggccttgctgaattattcacccgtgtcttttgcgtacttcttgtttccttggtgggctcgcccgccacaaggacaaccacataaacctttttgtaattgcaatcagcgtcagtaacaatgtaataattacaactttcaacaacggatctcttggttctggcatcgatgaagaacgcagcgaaatgcgatacgtagtgtgaattgcagaattcagtgaatcatcgaatctttgaacgcacattgcgccctttggtattccaaagggcatgcctgttcgagcgtcatttgtaccctcaagctttgcttggtgttgggcgccttgtcttcagttcgctggagactcgccttaaagtcattggcagccggcctactggtttcggagcgcagcacaagtcgcgctctcttccagccaaggtcagcgtccagtaagccttttttttcaacttttgacct |
| MT802498 | 2985 | *Chalastospora cetera* | (E.G. Simmons) E.G. Simmons 2007 | Yes. Successful. | ITS 4-5 | FJ839607 | 100 | 98 | 0 | cattacacaatacgaaggcgggctggacaccccccgctgggcactgcttcacggcgtgcgcggcggggccggccctgctgaactattcacccgtgtcttttgcgtacctcttgtttcctgggcgggctcgcccgccaccaggaccaaccacaaacctttttgtaatagcaatccgcgtcagtaacaacgtaattaattacaactttcaacaacggatctcttggttctggcatcgatgaagaacgcagcgaaatgcgatacgtagtgtgaattgcagaattcagtgaatcatcgaatctttgaacgcacattgcgccctttggtattccaaagggcatgcctgttcgagcgtcatttgtaccctcaagctttgcttggtgttgggcgtcttttgtctccagctcgctggagactcgccttaaagtcattggcagccggcctactggtttcggagcgcagcacaagtcgcgctctcttccagccaaggtcagcgtccagcaagcctttttttcaacctttgacct |
| MT802475 | 2986 | *Alternaria obclavata* | (Crous & U. Braun) Woudenb. & Crous 2013 | Yes. Successful. | ITS 4-5 | FJ839616 | 100 | 98 | 0 | cattacacaatacgaaggcgggctggacaccccctgctgggcactgcttcacggcgtgcgcggctgggccggccctgctgaactattcacccgtgtcttttgcgtacttcttgtttcctgggcgggttcgcccgccaccaggaccaaccataaacctttttgtaatagcaatccgcgtcagtaacaacgtaattaattacaactttcaacaacggatctcttggttctggcatcgatgaagaacgcagcgaaatgcgatacgtagtgtgaattgcagaattcagtgaatcatcgaatctttgaacgcacattgcgccctttggtattccaaagggcatgcctgttcgagcgtcatttgtaccctcaagctttgcttggtgttgggcgtttttgtctccagctcgctggagactcgccttaaagtcattggcagccggcctactggtttcggagcgcagcacaagtcgcgctctcttccagccaaggtcagcgtccagcaagcctttttttcaacctttgacct |
| MT802473 | 2987 | *Alternaria chlamydosporigena* | Woudenb. & Crous 2013 | Yes. Successful. | ITS 4-5 | KC466540 | 100 | 100 | 0 | cattacacaatatgaaggcgggctggatacccccagcagtgcgttgcttcgcggcgtgcgctgttgggccggccttgctgaattattcacccgtgtcttttgcgtacttcttgtttccttggtgggctcgcccaccacaaggacaaccccataaacctttttgtaatagcaatcagcgtcagtaacaatgtaataattacaactttcaacaacggatctcttggttctggcatcgatgaagaacgcagcgaaatgcgatacgtagtgtgaattgcagaattcagtgaatcatcgaatctttgaacgcacattgcgccctttggtattccaaagggcatgcctgttcgagcgtcatttgtaccctcaagctttgcttggtgttgggcgtcttgtctccagttcgctggagactcgccttaaagtcattggcagccggcctactggtttcggagcgcagcacaagtcgcgctctcttccagccaaggtcagcgtccagcaagcctttttttcaacttttgacct |
| MT802555 | 2988 | *Fusarium palustre* | W.H. Elmer & Marra 2021 | Yes. Successful. | ITS 4-5 | MH864236 | 99.79 | 100 | 0 | cattaccgagtttacaactccaaacccctgtgaacatacctttatgttgcctcggcggatcagcccgcgccccgtaaaacgggacggcccgccgcaggaaaccctaaactctgtttttagtggaacttctgagtataaaaaacaaataaatcaaaactttcaacaacggatctcttggttctggcatcgatgaagaacgcagcaaaatgcgataagtaatgtgaattgcagaattcagtgaatcatcgaatctttgaacgcacattgcgcccgccagtattctggcgggcatgcctgttcgagcgtcatttcaaccctcaagcccagcttggtgttgggatctgtcttcactgacagtcctcaaattgattggcggtcacgtcgagcttccatagcgtagtaatttacacatcgttactggtaatcgtcgcggccacgccgttaaaccccaacttctgaatgttgacct |
|  | 2989 |  |  | No. Sequencing failed. |  |  |  |  |  |  |
| MT802533 | 2990 | *Fusarium avenaceum* | (Fr.) Sacc. 1886 | Yes. Successful. | ITS 4-5 | MK770801 | 99 | 100 | 0 | CaTTACAACTCCCAAACCCCTGTGAACATACCTTAATGTTGCCTCGGCGGATCAGCCCGCGCCCCGTAAAACGGGACGGCCCGCCAGAGGACCCAAACTCTAATGTTTCTTATTGTAACTTCTGAGTAAAACAAACAAATAAATCAAAACTTTCAACAACGGATCTCTTGGTTCTGGCATCGATGAAGAACGCAGCAAAATGCGATAAGTAATGTGAATTGCAGAATTCAGTGAATCATCGAATCTTTGAACGCACATTGCGCCCGCTGGTATTCCGGCGGGCATGCCTGTTCGAGCGTCATTTCAACCCTCAAGCCCCCGGGTTTGGTGTTGGGGATCGGCTCTGCCTTCTGGCGGTGCCGCCCCCGAAATACATTGGCGGTCTCGCTGCAGCCTCCATTGCGTAGTAGCTAACACCTCGCAACTGGAACGCGGCGCGGCCATGCCGTAAAACCCCAACTTCTGAATGTTGACCT |
| MT802501 | 2991 | *Cladosporium cladosporioides* | (Fresen.) G.A. de Vries 1952 | Yes. Successful. | ITS 4-5 | MK813962 | 100 | 100 | 0 | CATTACAAGTGACCCCGGTCTAACCACCGGGATGTTCATAACCCTTTGTTGTCCGACTCTGTTGCCTCCGGGGCGACCCTGCCTTCGGGCGGGGGCTCCGGGTGGACACTTCAAACTCTTGCGTAACTTTGCAGTCTGAGTAAACTTAATTAATAAATTAAAACTTTTAACAACGGATCTCTTGGTTCTGGCATCGATGAAGAACGCAGCGAAATGCGATAAGTAATGTGAATTGCAGAATTCAGTGAATCATCGAATCTTTGAACGCACATTGCGCCCCCTGGTATTCCGGGGGGCATGCCTGTTCGAGCGTCATTTCACCACTCAAGCCTCGCTTGGTATTGGGCAACGCGGTCCGCCGCGTGCCTCAAATCGACCGGCTGGGTCTTCTGTCCCCTAAGCGTTGTGGAAACTATTCGCTAAAGGGTGTTCGGGAGGCTACGCCGTAAAACAACCCCATTTCTAAGGTTGACCTCGGATCAGGTAGGGATACCCGCTGAACT |
| MT802534 | 3004 | *Fusarium avenaceum* | (Fr.) Sacc. 1886 | Yes. Successful. | ITS 4-5 | MK012402 | 99 | 100 | 0 | cattaccgagtttacaactccaaacccctgtgaacataccttaatgttgcctcggcggatcagcccgcgccccgtaaaacgggacggcccgccagaggacccaaactctaatgtttcttattgtaacttctgagtaaaacaaacaaataaatcaaaactttcaacaacggatctcttggttctggcatcgatgaagaacgcagcaaaatgcgataagtaatgtgaattgcagaattcagtgaatcatcgaatctttgaacgcacattgcgcccgctggtattccggcgggcatgcctgttcgagcgtcatttcaaccctcaagcccccgggtttggtgttggggatcggctctgccttctggcggtgccgcccccgaaatacattggcggtctcgctgcagcctccattgcgtagtagctaacacctcgcaactggaacgcggcgcggccatgccgtaaaaccccaacttctgaatgttgacct |
| MT802530 | 3005 | *Fusarium acuminatum* | Ellis & Everh. 1895 | Yes. Successful. | ITS 4-5 | JF311926 | 100 | 100 | 0 | cattaccgagtttacaactccaaacccctgtgaacataccttaatgttgcctcggcggatcagcccgcgccccgtaaaacgggacggcccgccagaggacccaaactctaatgtttcttattgtaacttctgagtaaaacaaacaaataaatcaaaactttcaacaacggatctcttggttctggcatcgatgaagaacgcagcaaaatgcgataagtaatgtgaattgcagaattcagtgaatcatcgaatctttgaacgcacattgcgcccgctggtattccggcgggcatgcctgttcgagcgtcatttcaaccctcaagcccccgggtttggtgttggggatcggctctgcccttctgggcggtgccgcccccgaaatacattggcggtctcgctgcagcctccattgcgtagtagctaacacctcgcaactggaacgcggcgcggccatgccgtaaaaccccaacttctgaatgttgacct |
| MT802602 | 3006 | *Paradendryphiella salina* | (G.K. Sutherl.) Woudenb. & Crous 2013 | Yes. Successful. | ITS 4-5 | MH857928 | 100 | 100 | 0 | attattcacccatgtcttttgcgcacttcttgtttcctgggcgggttcgcccgccaccaggacccaaccataaacctttttttgtaattgcaatcagcgtcagtaaacaatgtaattattacaactttcaacaacggatctcttggttctggcatcgatgaagaacgcagcgaaatgcgatacgtagtgtgaattgcagaattcagtgaatcatcgaatctttgaacgcacattgcgccctttggtattccaaagggcatgcctgttcgagcgtcatttgtaccctcaagctttgcttggtgttgggcgtctttgtctctcacgagactcgccttaaaatgattggcagccggcctactggtttcggagcgcagcacaatcttgcacttctgatcagccatggttgagcatccatcaagaccacatttttctcacttttgacct |
| MT802447 | 3007 | *Acremonium fuci* | Summerb., Zuccaro & W. Gams 2004 | Yes. Successful. | ITS 4-5 | MF186078 | 99 | 100 | 0 | cattactgagtttacaactcccaacccctgtgaacatacctatgttgcttcggcgggccgtcccgcggcgcgcccacgtggcgtgacccggacccaggcgcccgccggggacccaaactcttgcctgtatagtgtctcctctgagtggcataagcaaaaataaacaaaactttcagcaacggatctcttggttctggcatcgatgaagaacgcagcgaaatgcgataagtaatgtgaattgcagaattcagtgaatcatcgaatctttgaacgcacattgcgcccgccagtattctggcgggcatgcctgtctgagcgtcatttcaaccctcagcccccgctcgcggggcgctggcgttggggctcggccgtccaccgcggcggccggccccgaaacacagtggcggtctcccgcggactcccctgcgtagtagcactacctcgcagaagggacgagcgggctggccacgccgtaaaaccccccacttctcaaggttgacct |
|  | 3008 | *Cadophora* sp. | Lagerb. & Melin, 1927 | Yes. Sequence quality poor. | ITS 4-5 |  |  |  |  |  |
| MT802448 | 3009 | *Acremonium fuci* | Summerb., Zuccaro & W. Gams 2004 | Yes. Successful. | ITS 4-5 | MF186078 | 99 | 100 | 0 | cattactgagtttacaactccaaacccctgtgaacatacctatgttgcttcggcgggccgtcccgcggcgcgcccacgtggcgtgacccggaaccaggcgcccgccggggacccaaactcttgcctgtatagtgtctcctctgagtggcataagcaaaaataaacaaaactttcagcaacggatctcttggttctggcatcgatgaagaacgcagcgaaatgcgataagtaatgtgaattgcagaattcagtgaatcatcgaatctttgaacgcacattgcgcccgccagtattctggcgggcatgcctgtctgagcgtcatttcaaccctcagcccccgctcgcggggcgctggcgttggggctcggccgtccaccgcggcggccggccccgaaacacagtggcggtctcccgcggactcccctgcgtagtagcactacctcgcagaagggacgagcgggctggccacgccgtaaaaccccccacttctcaaggttgacct |
|  | 3010 |  |  | No. Sequencing failed. |  |  |  |  |  |  |
| MT802580 | 3011 | *Neonectria lugdunensis* | (Sacc. & Therry) L. Lombard & Crous 2014 | Yes. Successful. | ITS 4-5 | MH863594 | 99 | 100 | 0 | cattaccgagtttacaactccaaacccctgtgaacatacctatcgttgcctcggcggtgcccgctccggcggcccgccagaggaccccaaactcttgttttatacagtatcttctgagtaacacgattaaataaatcaaaactttcaacaacggatctcttggttctggcatcgatgaagaacgcagcgaaatgcgataagtaatgtgaattgcagaattcagtgaatcatcgaatctttgaacgcacattgcgcccgccagtattctggcgggcatgcctgttcgagcgtcatttcaaccctcaagcccccgggcttggtgttggggatcggcgtgccctcgcggcgcgccgtccccgaaatctagtggcggtctcgctgtagcttcctctgcgtagtagcacacctcgcactggaaagcagcgcggccacgccgttaaaccccccacttctgaaaggttgacct |
|  | 3012 | *Cadophora* sp. | Lagerb. & Melin, 1927 | Yes. Sequence quality poor. ID based on morphology comparison with similar sequenced cultures. | ITS 4-5 |  |  |  |  |  |
| MT802499 | 3013 | *Chalastospora cetera* | (E.G. Simmons) E.G. Simmons 2007 | Yes. Successful. | ITS 4-5 | FJ839607 | 98 | 100 | 0 | cattacacaatacgaaggcgggctggacaccccccgctgggcactgcttcacggcgtgcgcggcggggccggccctgctgaactattcacccgtgtcttttgcgtacctcttgtttcctgggcgggctcgcccgccaccaggaccaaccacaaacctttttgtaatagcaatccgcgtcagtaacaacgtaattaattacaactttcaacaacggatctcttggttctggcatcgatgaagaacgcagcgaaatgcgatacgtagtgtgaattgcagaattcagtgaatcatcgaatctttgaacgcacattgcgccctttggtattccaaagggcatgcctgttcgagcgtcatttgtaccctcaagctttgcttggtgttgggcgtcttttgtctccagctcgctggagactcgccttaaagtcattggcagccggcctactggtttcggagcgcagcacaagtcgcgctctcttccagccaaggtcagcgtccagcaagcctttttttcaacctttgacct |
|  | 3014 |  |  | No. Sequencing failed. |  |  |  |  |  |  |
| MT802603 | 3015 | *Paradendryphiella* sp. | Woudenb. & Crous, 2013 | Yes. Successful. | ITS 4-5 | MH861738 | 100 | 99 | 1.00E-170 | cattattacaactttcaacaacggatctcttggttctggcatcgatgaagaacgcagcgaaatgcgatacgtagtgtgaattgcagaattcagtgaatcatcgaatctttgaacgcacattgcgccctttggtattccaaagggcatgcctgttcgagcgtcatttgtaccctcaagctttgcttggtgttgggcgtctttgtctctcacgagactcgccttaaaatgattggcagccggcctactggtttcggagcgcagcacaatcttgcacttctgatcagccatggttgagcatccatcaagaccacatttttctcacttttgacct |
| MT802449 | 3016 | *Acremonium fuci* | Summerb., Zuccaro & W. Gams 2004 | Yes. Successful. | ITS 4-5 | MF186078 | 99 | 100 | 0 | cattactgagtttacaactccaaacccctgtgaacatacctatgttgcttcggcgggccgtcccgcggcgcgcccacgtggcgtgacccggaaccaggcgcccgccggggacccaaactcttgcctgtatagtgtctcctctgagtggcataagcaaaaataaacaaaactttcagcaacggatctcttggttctggcatcgatgaagaacgcagcgaaatgcgataagtaatgtgaattgcagaattcagtgaatcatcgaatctttgaacgcacattgcgcccgccagtattctggcgggcatgcctgtctgagcgtcatttcaaccctcagcccccgctcgcggggcgctggcgttggggctcggccgtccaccgcggcggccggccccgaaacacagtggcggtctcccgcggactcccctgcgtagtagcactacctcgcagaagggacgagcgggctggccacgccgtaaaaccccccacttctcaaggttgacct |
| MT802516 | 3017 | *Neonectria neomacrospora* | (C. Booth & Samuels) Mantiri & Samuels 2001 | Yes. Successful. | ITS 4-5 | MH858067 | 99 | 100 | 0 | cattaccgagtttacaaactcccaacccctgtgaacatacccatcgttgcctcggcggtgcccgctccggcggcccgccagaggacccccaaactcttgttttatacagcatcttctgagtaacacgattaaatcaaatcaaaactttcaacaacggatctcttggttctggcatcgatgaagaacgcagcgaaatgcgataagtaatgtgaattgcagaattcagtgaaccatcgaatctttgaacgcacattgcgcccgccagtattctggcgggcatgcctgttcgagcgtcatttcaaccctcaagcccccgggcttggtgttggggatcggcgtgccctcgcggcgcgccgccccctaaatctagtggcggtctcgctgcagcttcctctgcgtagtagcacacctcgcaccggagagcagcgcggccacgccgtgaaaccccccacttctgaaaggttgacct |
| MT802517 | 3018 | *Neonectria neomacrospora* | (C. Booth & Samuels) Mantiri & Samuels 2001 | Yes. Successful. | ITS 4-5 | MH670287 | 99 | 100 | 0 | cattaccgagtttacaaactcccaacccctgtgaacatacccatcgttgcctcggcggtgcccgctccggcggcccgccagaggacccccaaactcttgttttatacagcatcttctgagtaacacgattaaatcaaatcaaaactttcaacaacggatctcttggttctggcatcgatgaagaacgcagcgaaatgcgataagtaatgtgaattgcagaattcagtgaaccatcgaatctttgaacgcacattgcgcccgccagtattctggcgggcatgcctgttcgagcgtcatttcaaccctcaagcccccgggcttggtgttggggatcggcgtgcccctcgcggcgcgccgccccctaaatctagtggcggtctcgctgcagcttcctctgcgtagtagcacacctcgcaccggagagcagcgcggccacgccgtgaaaccccccacttctgaaaggttgacct |
| MT802450 | 3019 | *Acremonium fuci* | Summerb., Zuccaro & W. Gams 2004 | Yes. Successful. | ITS 4-5 | MF186078 | 99 | 100 | 0 | cattactgagtttacaactccaaacccctgtgaacatacctatgttgcttcggcgggccgtcccgcggcgcgcccacgtggcgtgacccggaaccaggcgcccgccggggacccaaactcttgcctgtatagtgtctcctctgagtggcataagcaaaaataaacaaaactttcagcaacggatctcttggttctggcatcgatgaagaacgcagcgaaatgcgataagtaatgtgaattgcagaattcagtgaatcatcgaatctttgaacgcacattgcgcccgccagtattctggcgggcatgcctgtctgagcgtcatttcaaccctcagcccccgctcgcggggcgctggcgttggggctcggccgtccaccgcggcggccggccccgaaacacagtggcggtctcccgcggactcccctgcgtagtagcactacctcgcagaagggacgagcgggctggccacgccgtaaaaccccccacttctcaaggttgacct |
| MT802451 | 3020 | *Acremonium fuci* | Summerb., Zuccaro & W. Gams 2004 | Yes. Successful. | ITS 4-5 | MF186078 | 99 | 100 | 0 | cattactgagtttacaactccaaacccctgtgaacatacctatgttgcttcggcgggccgtcccgcggcgcgcccacgtggcgtgacccggaaccaggcgcccgccggggacccaaactcttgcctgtatagtgtctcctctgagtggcataagcaaaaataaacaaaactttcagcaacggatctcttggttctggcatcgatgaagaacgcagcgaaatgcgataagtaatgtgaattgcagaattcagtgaatcatcgaatctttgaacgcacattgcgcccgccagtattctggcgggcatgcctgtctgagcgtcatttcaaccctcagcccccgctcgcggggcgctggcgttggggctcggccgtccaccgcggcggccggccccgaaacacagtggcggtctcccgcggactcccctgcgtagtagcactacctcgcagaagggacgagcgggctggccacgccgtaaaaccccccacttctcaaggttgacct |
| MT802587 | 3021 | *Paradendryphiella salina* | (G.K. Sutherl.) Woudenb. & Crous 2013 | Yes. Successful. | ITS 4-5 | MH857928 | 100 | 100 | 0 | attattcacccatgtcttttgcgcacttcttgtttcctgggcgggttcgcccgccaccaggacccaaccataaacctttttttgtaattgcaatcagcgtcagtaaacaatgtaattattacaactttcaacaacggatctcttggttctggcatcgatgaagaacgcagcgaaatgcgatacgtagtgtgaattgcagaattcagtgaatcatcgaatctttgaacgcacattgcgccctttggtattccaaagggcatgcctgttcgagcgtcatttgtaccctcaagctttgcttggtgttgggcgtctttgtctctcacgagactcgccttaaaatgattggcagccggcctactggtttcggagcgcagcacaatcttgcacttctgatcagccatggttgagcatccatcaagaccacatttttctcacttttgacct |
|  | 3022 | *Cladosporium* sp. | Link, 1816 | Yes. Sequence quality poor. | ITS 4-5 |  |  |  |  |  |
| MT802588 | 3023 | *Paradendryphiella salina* | (G.K. Sutherl.) Woudenb. & Crous 2013 | Yes. Successful. | ITS 4-5 | MH857928 | 100 | 100 | 0 | attattcacccatgtcttttgcgcacttcttgtttcctgggcgggttcgcccgccaccaggacccaaccataaacctttttttgtaattgcaatcagcgtcagtaaacaatgtaattattacaactttcaacaacggatctcttggttctggcatcgatgaagaacgcagcgaaatgcgatacgtagtgtgaattgcagaattcagtgaatcatcgaatctttgaacgcacattgcgccctttggtattccaaagggcatgcctgttcgagcgtcatttgtaccctcaagctttgcttggtgttgggcgtctttgtctctcacgagactcgccttaaaatgattggcagccggcctactggtttcggagcgcagcacaatcttgcacttctgatcagccatggttgagcatccatcaagaccacatttttctcacttttgacct |
|  | 3024 |  |  | No. Triplicate PCR failed. |  |  |  |  |  |  |
|  | 3026 |  |  | No. Sequencing failed. |  |  |  |  |  |  |
| MT802581 | 3027 | *Neonectria neomacrospora* | (C. Booth & Samuels) Mantiri & Samuels 2001 | Yes. Successful. | ITS 4-5 | MH134563 | 99 | 100 | 0 | attaaatcaaatcaaaactttcaacaacggatctcttggttctggcatcgatgaagaacgcagcgaaatgcgataagtaatgtgaattgcagaattcagtgaaccatcgaatctttgaacgcacattgcgcccgccagtattctggcgggcatgcctgttcgagcgtcatttcaaccctcaagcccccgggcttggtgttggggatcggcgtgccctcgcggcgcgccgccccctaaatctagtggcggtctcgctgcagcttcctctgcgtagtagcacacctcgcaccggagagcagcgcggccacgccgtgaaaccccccacttctgaaaggttgacct |
| MT802589 | 3028 | *Paradendryphiella salina* | (G.K. Sutherl.) Woudenb. & Crous 2013 | Yes. Successful. | ITS 4-5 | MH857928 | 100 | 100 | 0 | attattcacccatgtcttttgcgcacttcttgtttcctgggcgggttcgcccgccaccaggacccaaccataaacctttttttgtaattgcaatcagcgtcagtaaacaatgtaattattacaactttcaacaacggatctcttggttctggcatcgatgaagaacgcagcgaaatgcgatacgtagtgtgaattgcagaattcagtgaatcatcgaatctttgaacgcacattgcgccctttggtattccaaagggcatgcctgttcgagcgtcatttgtaccctcaagctttgcttggtgttgggcgtctttgtctctcacgagactcgccttaaaatgattggcagccggcctactggtttcggagcgcagcacaatcttgcacttctgatcagccatggttgagcatccatcaagaccacatttttctcacttttgacct |
| MT802452 | 3029 | *Acremonium fuci* | Summerb., Zuccaro & W. Gams 2004 | Yes. Successful. | ITS 4-5 | MF186078 | 99 | 100 | 0 | cattactgagtttacaactccaaacccctgtgaacatacctatgttgcttcggcgggccgtcccgcggcgcgcccacgtggcgtgacccggaaccaggcgcccgccggggacccaaactcttgcctgtatagtgtctcctctgagtggcataagcaaaaataaacaaaactttcagcaacggatctcttggttctggcatcgatgaagaacgcagcgaaatgcgataagtaatgtgaattgcagaattcagtgaatcatcgaatctttgaacgcacattgcgcccgccagtattctggcgggcatgcctgtctgagcgtcatttcaaccctcagcccccgctcgcggggcgctggcgttggggctcggccgtccaccgcggcggccggccccgaaacacagtggcggtctcccgcggactcccctgcgtagtagcactacctcgcagaagggacgagcgggctggccacgccgtaaaaccccccacttctcaaggttgacct |
| MT802576 | 3030 | *Neoascochyta paspali* | (P.R. Johnst.) Qian Chen & L. Cai 2015 | Yes. Successful. | ITS 4-5 | MK012408 | 99 | 100 | 0 | cattaccgagagttgtaggcttctgtctaccatctcttacccatgtcttttgcgtactacacgtttcctcggcaggtccgcctgccgttaggacaatttaaaccatttgcagttgcagtcagcgtctgaaaaacttaataattacaacttttaacaacggatctcttggttctggcatcgatgaagaacgcagcgaaatgcgataagtagtgtgaattgcagaattcagtgaatcatcgaatctttgaacgcacattgcgccccttggtattccatggggcatgcctgttcgagcgtcatttgtaccttcaagctctgcttggtgttgggtgtttgtcccgcctctgtgcgtggactcgccttaaagcaattggcagccgacgtattgtttcggagcgcagcacaaattgcgctttgtagctattacgacagcatccatcaagccttttttcacgcttgacct |
| MT802590 | 3031 | *Paradendryphiella salina* | (G.K. Sutherl.) Woudenb. & Crous 2013 | Yes. Successful. | ITS 4-5 | MH857928 | 100 | 100 | 0 | attattcacccatgtcttttgcgcacttcttgtttcctgggcgggttcgcccgccaccaggacccaaccataaacctttttttgtaattgcaatcagcgtcagtaaacaatgtaattattacaactttcaacaacggatctcttggttctggcatcgatgaagaacgcagcgaaatgcgatacgtagtgtgaattgcagaattcagtgaatcatcgaatctttgaacgcacattgcgccctttggtattccaaagggcatgcctgttcgagcgtcatttgtaccctcaagctttgcttggtgttgggcgtctttgtctctcacgagactcgccttaaaatgattggcagccggcctactggtttcggagcgcagcacaatcttgcacttctgatcagccatggttgagcatccatcaagaccacatttttctcacttttgacct |
| MT802615 | 3032 | *Phaeosphaeria culmorum* | (Auersw.) Leuchtm. 1984 | Yes. Successful. | ITS 4-5 | MH861992 | 100 | 100 | 0 | cattacattcagtagcttgctactggtcgggaggcgctgtaactccgcatagtattcatttactgatgagcggctggccctctgtctgtacccttgtcttttgcgcactcatgtttcctcggcgggcttgcccgccgattggacaaaactataacctttttaattttcaatcagcgtctgaaaaaacttaataattacaactttcaacaacggatctcttggttctggcatcgatgaagaacgcagcgaaatgcgataagtagtgtgaattgcagaattcagtgaatcatcgaatctttgaacgcacattgcgccccttggtattccatggggcatgcctgttcgagcgtcatttgtaccctcaagctctgcttggtgttgggtgtttgtcctctcctctgcgtttggactcgccttaaagcaattggcagccagtgttttggtattgaagcgcagcacattttgcgattctagccgataatacttgcgtccataagccttttttaacttttgacct |
| MT802591 | 3033 | *Paradendryphiella salina* | (G.K. Sutherl.) Woudenb. & Crous 2013 | Yes. Successful. | ITS 4-5 | MH857928 | 100 | 100 | 0 | attattcacccatgtcttttgcgcacttcttgtttcctgggcgggttcgcccgccaccaggacccaaccataaacctttttttgtaattgcaatcagcgtcagtaaacaatgtaattattacaactttcaacaacggatctcttggttctggcatcgatgaagaacgcagcgaaatgcgatacgtagtgtgaattgcagaattcagtgaatcatcgaatctttgaacgcacattgcgccctttggtattccaaagggcatgcctgttcgagcgtcatttgtaccctcaagctttgcttggtgttgggcgtctttgtctctcacgagactcgccttaaaatgattggcagccggcctactggtttcggagcgcagcacaatcttgcacttctgatcagccatggttgagcatccatcaagaccacatttttctcacttttgacct |
| MT802453 | 3034 | *Acremonium fuci* | Summerb., Zuccaro & W. Gams 2004 | Yes. Successful. | ITS 4-5 | MF186078 | 99 | 100 | 0 | cattactgagtttacaactccaaacccctgtgaacatacctatgttgcttcggcgggccgtcccgcggcgcgcccacgtggcgtgacccggaaccaggcgcccgccggggacccaaactcttgcctgtatagtgtctcctctgagtggcataagcaaaaataaacaaaactttcagcaacggatctcttggttctggcatcgatgaagaacgcagcgaaatgcgataagtaatgtgaattgcagaattcagtgaatcatcgaatctttgaacgcacattgcgcccgccagtattctggcgggcatgcctgtctgagcgtcatttcaaccctcagcccccgctcgcggggcgctggcgttggggctcggccgtccaccgcggcggccggccccgaaacacagtggcggtctcccgcggactcccctgcgtagtagcactacctcgcagaagggacgagcgggctggccacgccgtaaaaccccccacttctcaaggttgacct |
|  | 3035 |  |  | No. Sequencing failed. |  |  |  |  |  |  |
|  | 3036 |  |  | No. Triplicate PCR No. Sequencing failed. |  |  |  |  |  |  |
| MT802460 | 3037 | *Acremonium* sp. | Link, 1809 | Yes. Successful. | ITS 4-5 | MH859576 | 96 | 100 | 0 | cattacagagtgtaaaactcccaacccctgtgaacttaccagtcgttgcttcggcgggatcgccccgggcgccatcgcgtgccccggaaccaggcgcccgccgggggaatcaaactcttgttttactttagtggtattctctgagtggctatatgcaaacaaatgaatcaaaactttcaacaacggatctcttggttctggcatcgatgaagaacgcagcgaaatgcgataagtaatgtgaattgcagaattcagtgaatcatcgaatctttgaacgcacattgcgcccgctagtattctggcgggcatgcctgtctgagcgtcatttcaccaatcccctgggcatttgtgtccgggggctgttggggatcgccgaccgccccccggggcgggcgtcgtcccctaaacctagtggcagcctcgccgcggcctcccctgcgtagtaaacactctcgcaggcggaaccacagcgaagggtcgccgtaaaaccccccaacttcttaatggttgacct |
|  | 3038 |  |  | No. Sequencing failed. | ITS 4-5 |  |  |  |  |  |
|  | 3039 |  |  | No. Triplicate PCR No. Sequencing failed. |  |  |  |  |  |  |
| MT802535 | 3040 | *Fusarium avenaceum* | (Fr.) Sacc. 1886 | Yes. Successful. | ITS 4-5 | MK770801 | 100 | 100 | 0.00E+00 | CATTACCGAGTTTACAACTCCCAAACCCCTGTGAACATACCTTAATGTTGCCTCGGCGGATCAGCCCGCGCCCCGTAAAACGGGACGGCCCGCCAGAGGACCCAAACTCTAATGTTTCTTATTGTAACTTCTGAGTAAAACAAACAAATAAATCAAAACTTTCAACAACGGATCTCTTGGTTCTGGCATCGATGAAGAACGCAGCAAAATGCGATAAGTAATGTGAATTGCAGAATTCAGTGAATCATCGAATCTTTGAACGCACATTGCGCCCGCTGGTATTCCGGCGGGCATGCCTGTTCGAGCGTCATTTCAACCCTCAAGCCCCCGGGTTTGGTGTTGGGGATCGGCTCTGCCTTCTGGCGGTGCCGCCCCCGAAATACATTGGCGGTCTCGCTGCAGCCTCCATTGCGTAGTAGCTAACACCTCGCAACTGGAACGCGGCGCGGCCATGCCGTAAAACCCCAACTTCTGAATGTTGACCT |
| MT802518 | 3041 | *Diatrypella favacea* | (Fr.) Ces. & De Not. 1863 | Yes. Successful. | ITS 4-5 | AJ302440 | 100 | 100 | 0 | CATTACAGAGTTATCTAACTCCCAAAACCATGTGAACTTACCTATGTTGCCTCGGCGGGGAAGCCTACCCGGTACCTACCCTGTAGTTACCCGGGAGCGAGCTACCCTGTAGCCCGCTGCTGGCCTACCCGCCGGTGGACTGTTAAACTCTTGTTTTTTAGTGATTATCTGAGTGTTTATACTTAATAAGTTAAAACTTTCAACAACGGATCTCTTGGTTCTGGCATCGATGAAGAACGCAGCGAAATGCGATAAGTAATGTGAATTGCAGAATTCAGTGAATCATCGAATCTTTGAACGCACATTGCGCCCATTAGTATTCTAGTGGGCATGCCTGTTCGAGCGTCATTTCAACCCTCAAGCCCTAGTTGCTTGGTGTTGGGAGCCTATCTCCGGATAGCTCCTCAAAACCATTGGCGGAGTCGCGATGGCCCCAAGCGTAGTAATTTTTATTCGCTTCAGGTGTGTCAGCGCTGGCGTTCAGCCGTTAAACCCCCTATTTTCTAGTGGTTGACCT |
| MT802614 | 3042 | *Phaeoacremonium hungaricum* | Essakhi, Mugnai, Surico & Crous 2008 | Yes. Successful. | ITS 4-5 | NR_135953 | 99.79 | 100 | 0 | CATTACCGAGTCTCGTACTCCAAACCCTTTGTGAACATACCTGTTTCGTTGCTTCGGCAGGCCCCGGGGTCACCCCCGGGCCCGCCGCCGGCCCCCTCTCCGGGGCGCTTGGCGGGCCTGCCGGAGGGCACAGACTCTGTATTCAAGAACGTACCTCTCTGAGTTATCTTTACAAACAAGTAAAAACTTTCAACAACGGATCTCTTGGTTCTGGCATCGATGAAGAACGCAGCGAAATGCGATAAGTAATGTGAATTGCAGAATTCAGTGAATCATCGAATCTTTGAACGCACATTGCGCCCGCTAGTATTCTGGCGGGCATGCCTGTCCGAGCGTCATTTCAACCCTCAGGCCCTGGTTGCCTGGTGTTGGGGCGCCGCGTCCCCCAGCGGGCGCGGGCCCCGAAAGTCAGTGGCGGGCTCGCCAGGACTCCGAGCGCAGTAGTTTACACCTCGCTGCGGAGGACCT |
| MT802572 | 3043 | *Nectria nigrescens* | Cooke 1878 | Yes. Successful. | ITS 4-5 | MH864604 | 100 | 100 | 0 | CATTACCGAGTTTACAACTCCCAAACCCCTGTGAACATACCTTTACTGTTGCTTCGGCGGGATCGCCCCGGCGCCCTCGGGCCCGGACCCAGGCGCCCGCCGGAGGACCCAAACTCTTGTTTCCATTGTGATTCTCTGAGTGATACAAGCAAATAAATTAAAACTTTCAACAACGGATCTCTTGGTTCTGGCATCGATGAAGAACGCAGCGAAATGCGATAAGTAATGTGAATTGCAGAATTCAGTGAATCATCGAATCTTTGAACGCACATTGCGCCCGCCAGTACTCTGGCGGGCATGCCTGTTCGAGCGTCATTTCAACCCTCAAGCCCCTTCGGGCTTGGTGTTGGGGATCGGCCTGCGGCGTCTGACGCCGTGGCCGGCCCCGAAATCTAGTGGCGGTCTCGCTGTAGTCCTCCTCTGCGTAGTAGCACACCTCGCACCGGAACTTAGCGCGGCCACGCCGTTAAACCCCAACTTTCTGAAGTTTGACCT |
| MT802489 | 3047 | *Cadophora luteo-olivacea* | (J.F.H. Beyma) T.C. Harr. & McNew 2003 | Yes. Successful. | ITS 4-5 | MH029122 | 99.82 | 100 | 0 | CATTACTAGAGCAAAGGACAGGCAGCGCCCCACAGAAGCTTGCTTCGTGGCGGGGCTACCCTACTTCGGTAGGGTTTAGAGCCGTCGACCCTCTCGGAGAAGGTCGGTCCTGAACTCCACCCTTGAATAAACTACCTTTGTTGCTTTGGCGGGCCGCCTCGCGCCAGCGGCTTCGGCTGTTGAGTGCCCGCCAGAGGACCACAACTCTTGTTTTTAGTGATGTCTGAGTACTATATAATAGTTAAAACTTTCAACAACGGATCTCTTGGTTCTGGCATCGATGAAGAACGCAGCGAAATGCGATAAGTAATGTGAATTGCAGAATTCAGTGAATCATCGAATCTTTGAACGCACATTGCGCCCTCTGGTATTCCGGGGGGCATGCCTGTTCGAGCGTCATTATAACCACTCAAGCTCTCGCTTGGTATTGGGGCTCGCGGTTTCGCGGCTCCTAAAATCAGTGGCGGTGCCTGTCGGCTCTACGCGTAGTAATACTCCTCGCGTCTGGGTCCGGTAGGTCTACTTGCCAGCAACCCCCAATTTTTACAGGTTGACCT |
|  | 3048 |  |  | No. Sequencing failed. |  |  |  |  |  |  |
|  | 3049 |  |  | No. Sequencing failed. |  |  |  |  |  |  |
|  | 3050 | *Cadophora luteo-olivacea* | (J.F.H. Beyma) T.C. Harr. & McNew 2003 | Yes. Successful. | ITS 4-5 | MH856091 | 100 | 100 | 0 | cattactagagcaaggacaggcagcgccccacagaagcttgcttcgtggcggggctaccctacttcggtagggtttagagccgtcgaccctctcggagaaggtcggtcctgaactccacccttgaataaactacctttgttgctttggcgggccgcctcgcgccagcggcttcggctgttgagtgcccgccagaggaccacaactcttgtttttagtgatgtctgagtactatataatagttaaaactttcaacaacggatctcttggttctggcatcgatgaagaacgcagcgaaatgcgataagtaatgtgaattgcagaattcagtgaatcatcgaatctttgaacgcacattgcgccctctggtattccggggggcatgcctgttcgagcgtcattataaccactcaagctctcgcttggtattggggttcgcggtttcgcggctcctaaaatcagtggcggtgcctgtcggctctacgcgtagtaatactcctcgcgtctgggtccggtaggtctacttgccagcaacccccaatttttacaggttgacct |
| MT802548 | 3051 | *Fusarium oxysporum* | Schltdl. 1824 | Yes. Successful. | ITS 4-5 | KX263816 | 100 | 100 | 0 | cattaccgagtttacaactcccaaacccctgtgaacataccttatgttgcctcggcggatcagcccgcgccccgtaaaacgggacggcccgccgcaggaaccccaaaactctgtttttagtggaacttctgagtaaaaaaacaaataaatcaaaactttcaacaacggatctcttggttctggcatcgatgaagaacgcagcaaaatgcgataagtaatgtgaattgcagaattcagtgaatcatcgaatctttgaacgcacattgcgcccgccagtattctggcgggcatgcctgttcgagcgtcatttcaaccctcaaacccccgggtttggtgttggggatcgggcttttgcttcggcagcccggccccgaaatctagtggcggtctcgctgcagcctccattgcgtagtagctaacacctcgcaactggaacgcggcgcggccaagccgttaaacccccaacttctgaatgttgacct |
| MT802490 | 3052 | *Cadophora luteo-olivacea* | (J.F.H. Beyma) T.C. Harr. & McNew 2003 | Yes. Successful. | ITS 4-5 | MH856091 | 100 | 100 | 0 | cattactagagcaaggacaggcagcgccccacagaagcttgcttcgtggcggggctaccctacttcggtagggtttagagccgtcgaccctctcggagaaggtcggtcctgaactccacccttgaataaactacctttgttgctttggcgggccgcctcgcgccagcggcttcggctgttgagtgcccgccagaggaccacaactcttgtttttagtgatgtctgagtactatataatagttaaaactttcaacaacggatctcttggttctggcatcgatgaagaacgcagcgaaatgcgataagtaatgtgaattgcagaattcagtgaatcatcgaatctttgaacgcacattgcgccctctggtattccggggggcatgcctgttcgagcgtcattataaccactcaagctctcgcttggtattggggttcgcggtttcgcggctcctaaaatcagtggcggtgcctgtcggctctacgcgtagtaatactcctcgcgtctgggtccggtaggtctacttgccagcaacccccaatttttacaggttgacct |
| MT802577 | 3053 | *Neoascochyta paspali* | (P.R. Johnst.) Qian Chen & L. Cai 2015 | Yes. Successful. | ITS 4-5 | MK012408 | 99.78 | 100 | 0 | attaccgagagttgtaggcttctgtctaccatctcttacccatgtcttttgcgtactacacgtttcctcggcaggtccgcctgccgttaggacaatttaaaccatttgcagttgcagtcagcgtctgaaaaacttaataattacaacttttaacaacggatctcttggttctggcatcgatgaagaacgcagcgaaatgcgataagtagtgtgaattgcagaattcagtgaatcatcgaatctttgaacgcacattgcgccccttggtattccatggggcatgcctgttcgagcgtcatttgtaccttcaagctctgcttggtgttgggtgtttgtcccgcctctgtgcgtggactcgccttaaagcaattggcagccgacgtattgtttcggagcgcagcacaaattgcgctttgtagctattacgacagcatccatcaagccttttttcacgcttgacct |
| MT802545 | 3054 | *Fusarium lateritium* | Nees 1816 | Yes. Successful. | ITS 4-5 | MG066631 | 100 | 99 | 0 | cattaccgagtttacaactccaaacccctgtgaacataccttaatgttgcctcggcggatcagcccgctccccgtaaaacgggacggcccgccagaggacccaaactctaatgtttcttattgtaacttctgagtaaaacaaacaaataaatcaaaactttcaacaacggatctcttggttctggcatcgatgaagaacgcagcaaaatgcgataagtaatgtgaattgcagaattcagtgaatcatcgaatctttgaacgcacattgcgcccgctggtattccggcgggcatgcctgttcgagcgtcatttcaaccctcaagcccccgggtttggtgttggggatcggctctgcctcacggcggtgccgcccccgaaatacattggcggtctcgctgcagcctccattgcgtagtagctaacacctcgcaactggaacgcggcgcggccatgccgtaaaaccccaacttctgaatgttgacct |
| MT802527 | 3055 | *Epicoccum nigrum* | Link 1816 | Yes. Successful. | ITS 4-5 | MH857851 | 100 | 100 | 0 | attacctagagtttgtagacttcggtctgctacctcttacccatgtcttttgagtaccttcgtttcctcggcgggtccgcccgccgattggacaacattcaaaccctttgcagttgcaatcagcgtctgaaaaaacataatagttacaactttcaacaacggatctcttggttctggcatcgatgaagaacgcagcgaaatgcgataagtagtgtgaattgcagaattcagtgaatcatcgaatctttgaacgcacattgcgccccttggtattccatggggcatgcctgttcgagcgtcatttgtaccttcaagctctgcttggtgttgggtgtttgtctcgcctctgcgtgtagactcgccttaaaacaattggcagccggcgtattgatttcggagcgcagtacatctcgcgctttgcactcataacgacgacgtccaaaagtacatttttacactcttgacct |
| MT802624 | 3056 | *Pringsheimia* sp. | Schulzer | Yes. Successful. | ITS 4-5 | NR_145344 | 91.62 | 100 | 0 | attaatttcggtagtttactactgtttgagggaagtggaaacttttcaggcctccctgaactgaagtacacttcttttcttaacccttgactttttgcgcactcatgtttcctcggcaggcctgcctgccgtttggacacttctataaccttttgaatcttcaatcagcgtctgaataacattaataattacaactttcaacaacggatctcttggttctggcatcgatgaagaacgcagcgaaatgcgataagtagtgtgaattgcagaattcagtgaatcatcgaatctttgaacgcacattgcgccccttggtattccatggggcatgcctgttcgagcgtcatttgtactctcaagctttgcttggtgttgggcgatttgtctctgctatgcccagactcgccttaaatacattggcagccgatattttggtttgaagcgcagcacaattgcaattcgggcttgtgaatatcagcatccatcaaggtaatgcaacactttgacct |
|  | 3057 |  |  | No. Triplicate PCR failed. |  |  |  |  |  |  |
|  | 3058 |  |  | No. Sequencing failed. |  |  |  |  |  |  |
| MT802592 | 3061 | *Paradendryphiella salina* | (G.K. Sutherl.) Woudenb. & Crous 2013 | Yes. Successful. | ITS 4-5 | MH857928 | 100 | 100 | 0 | ATTATTCACCCATGTCTTTTGCGCACTTCTTGTTTCCTGGGCGGGTTCGCCCGCCACCAGGACCCAACCATAAACCTTTTTTTGTAATTGCAATCAGCGTCAGTAAACAATGTAATTATTACAACTTTCAACAACGGATCTCTTGGTTCTGGCATCGATGAAGAACGCAGCGAAATGCGATACGTAGTGTGAATTGCAGAATTCAGTGAATCATCGAATCTTTGAACGCACATTGCGCCCTTTGGTATTCCAAAGGGCATGCCTGTTCGAGCGTCATTTGTACCCTCAAGCTTTGCTTGGTGTTGGGCGTCTTTGTCTCTCACGAGACTCGCCTTAAAATGATTGGCAGCCGGCCTACTGGTTTCGGAGCGCAGCACAATCTTGCACTTCTGATCAGCCATGGTTGAGCATCCATCAAGACCACATTTTTCTCACTTTTGACCT |
| MT802593 | 3062 | *Paradendryphiella salina* | (G.K. Sutherl.) Woudenb. & Crous 2013 | Yes. Successful. | ITS 4-5 | MK432723 | 100 | 100 | 0 | cattacacaatatgaaagcgggttgggacctcatctcggtgggggctccagcttgtctgaattattcacccatgtcttttgcgcacttcttgtttcctgggcgggttcgcccgccaccaggacccaaccataaacctttttttgtaattgcaatcagcgtcagtaaacaatgtaattattacaactttcaacaacggatctcttggttctggcatcgatgaagaacgcagcgaaatgcgatacgtagtgtgaattgcagaattcagtgaatcatcgaatctttgaacgcacattgcgccctttggtattccaaagggcatgcctgttcgagcgtcatttgtaccctcaagctttgcttggtgttgggcgtctttgtctctcacgagactcgccttaaaatgattggcagccggcctactggtttcggagcgcagcacaatcttgcacttctgatcagccatggttgagcatccatcaagaccacatttttctcacttttgacct |
| MT802466 | 3063 | *Alternaria chlamydospora* | Mouch. 1973 | Yes. Successful. | ITS 4-5 | MK461088 | 100 | 100 | 0 | cattacacaataagaaggcgggctggatacccccagcagtgcgttgcttcgcggcgtgcgctgttgggccggccttgctgaattattcacccgtgtcttttgcgtacttcttgtttccttggtgggctcgcccaccacaaggacaaccccataaacctttttgtaatagcaatcagcgtcagtaacaatgtaataattacaactttcaacaacggatctcttggttctggcatcgatgaagaacgcagcgaaatgcgatacgtagtgtgaattgcagaattcagtgaatcatcgaatctttgaacgcacattgcgccctttggtattccaaagggcatgcctgttcgagcgtcatttgtaccctcaagctttgcttggtgttgggcgtcttgtctccagttcgctggagactcgccttaaagtcattggcagccggcctactggtttcggagcgcagcacaagtcgcgctctcatccagccaaggtcagcgtccagtaagcctttttttcaacttttgacct |
| MT802474 | 3064 | *Alternaria chlamydosporigena* | Woudenb. & Crous 2013 | Yes. Successful. | ITS 4-5 | KC466540 | 100 | 100 | 0 | CATTACACAATATGAAGGCGGGCTGGATACCCCCAGCAGTGCGTTGCTTCGCGGCGTGCGCTGTTGGGCCGGCCTTGCTGAATTATTCACCCGTGTCTTTTGCGTACTTCTTGTTTCCTTGGTGGGCTCGCCCACCACAAGGACAACCCCATAAACCTTTTTGTAATAGCAATCAGCGTCAGTAACAATGTAATAATTACAACTTTCAACAACGGATCTCTTGGTTCTGGCATCGATGAAGAACGCAGCGAAATGCGATACGTAGTGTGAATTGCAGAATTCAGTGAATCATCGAATCTTTGAACGCACATTGCGCCCTTTGGTATTCCAAAGGGCATGCCTGTTCGAGCGTCATTTGTACCCTCAAGCTTTGCTTGGTGTTGGGCGTCTTGTCTCCAGTTCGCTGGAGACTCGCCTTAAAGTCATTGGCAGCCGGCCTACTGGTTTCGGAGCGCAGCACAAGTCGCGCTCTCTTCCAGCCAAGGTCAGCGTCCAGCAAGCCTTTTTTTCAACTTTTGACCT |
| MT802454 | 3065 | *Acremonium fuci* | Summerb., Zuccaro & W. Gams 2004 | Yes. Successful. | ITS 4-5 | MF186078 | 99.8 | 100 | 0 | cattactgagtttacaactccaaacccctgtgaacatacctatgttgcttcggcgggccgtcccgcggcgcgcccacgtggcgtgacccggaaccaggcgcccgccggggacccaaactcttgcctgtatagtgtctcctctgagtggcataagcaaaaataaacaaaactttcagcaacggatctcttggttctggcatcgatgaagaacgcagcgaaatgcgataagtaatgtgaattgcagaattcagtgaatcatcgaatctttgaacgcacattgcgcccgccagtattctggcgggcatgcctgtctgagcgtcatttcaaccctcagcccccgctcgcggggcgctggcgttggggctcggccgtccaccgcggcggccggccccgaaacacagtggcggtctcccgcggactcccctgcgtagtagcactacctcgcagaagggacgagcgggctggccacgccgtaaaaccccccacttctcaaggttgacct |
| MT802570 | 3066 | *Lulworthia* sp. 2 | G.K.Sutherland, 1916 | Yes. Successful. | ITS 4-5 | KU214534 | 99.79 | 100 | 0 | cattaccgagttgcaaactcccaacccttctgtggacctcttaaacgttgcctcggcgggctcgcccgccgctggccaaccataaaaaccatcgctagacgtacatctgagtggacaatataaaataagtcaaaactttcagcaacggatctcttggctctggcatcgatgaagaacgcagcgaaatgcgatacgtaatgtgaattgcagaattcagtgaatcatcgaatctttgaacgcacattgcgcctgccggtattccggcgggcatgcctgtccgagcgtcattaaaacccctcgggcccacctctcgcgaggcaggcccggcgttggggcaccggcagacctcgcggtcccccgggccctcaaattcagtggcggacgcccccacgagcctcccagcgcagtagctcactcgctgacggagcgccggcggagcgcctcgcctcgacgacccatacgagtttgacct |
| MT802479 | 3071 | *Cadophora luteo-olivacea* | (J.F.H. Beyma) T.C. Harr. & McNew 2003 | Yes. Successful. | ITS 4-5 | KU214556 | 99.1 | 100 | 0 | CATTACTAGAGCAAAGGACAGGCAGCACCCCACAGAAGCTTGCTTCGTGGCGGGCTACCCTACTTCGGTAGGGTTTAGAGCCGTCGACCCTCTCGCAGAAGGTCGGTCCTGAACTCCACCCTTGAATAAATTACCTTTGTTGCTTTGGCGGGCCGCCTCGCGCCAGCGGCTTCGGCTGTTGAGTGCCCGCCAGAGGACCCCAACTCTTGTTTTTAGTGATGTCTGAGTACTATATAATAGTTAAAACTTTCAACAACGGATCTCTTGGTTCTGGCATCGATGAAGAACGCAGCGAAATGCGATAAGTAATGTGAATTGCAGAATTCAGTGAATCATCGAATCTTTGAACGCACATTGCGCCCTCTGGTATTCCGGGGGGCATGCCTGTTCGAGCGTCATTATAACCACTCAAGCTCTCGCTTGGTATTGGGGTTCGCGGTTTCGCGGCCCCTAAAACCAGTGGCGGTGCCTGTCGGCTCTACGCGTAGTAATACTCCTCGCGTCTGGGTCCGGTAGGTCTACTTGCCAGCAACCCCCAATTTTTACAGGTTGACCT |
| MT802491 | 3072 | *Cadophora luteo-olivacea* | (J.F.H. Beyma) T.C. Harr. & McNew 2003 | Yes. Successful. | ITS 4-5 | KU214556 | 99.1 | 100 | 0 | CATTACTAGAGCAAAGGACAGGCAGCACCCCACAGAAGCTTGCTTCGTGGCGGGCTACCCTACTTCGGTAGGGTTTAGAGCCGTCGACCCTCTCGCAGAAGGTCGGTCCTGAACTCCACCCTTGAATAAATTACCTTTGTTGCTTTGGCGGGCCGCCTCGCGCCAGCGGCTTCGGCTGTTGAGTGCCCGCCAGAGGACCCCAACTCTTGTTTTTAGTGATGTCTGAGTACTATATAATAGTTAAAACTTTCAACAACGGATCTCTTGGTTCTGGCATCGATGAAGAACGCAGCGAAATGCGATAAGTAATGTGAATTGCAGAATTCAGTGAATCATCGAATCTTTGAACGCACATTGCGCCCTCTGGTATTCCGGGGGGCATGCCTGTTCGAGCGTCATTATAACCACTCAAGCTCTCGCTTGGTATTGGGGTTCGCGGTTTCGCGGCCCCTAAAACCAGTGGCGGTGCCTGTCGGCTCTACGCGTAGTAATACTCCTCGCGTCTGGGTCCGGTAGGTCTACTTGCCAGCAACCCCCAATTTTTACAGGTTGACCT |
| MT802536 | 3073 | *Fusarium avenaceum* | (Fr.) Sacc. 1886 | Yes. Successful. | ITS 4-5 | MK650409 | 100 | 100 | 0 | CATTACCGAGTTTACAACTCCCAAACCCCTGTGAACATACCTTAATGTTGCCTCGGCGGATCAGCCCGCGCCCCGTAAAACGGGACGGCCCGCCAGAGGACCCAAACTCTAATGTTTCTTATTGTAACTTCTGAGTAAAACAAACAAATAAATCAAAACTTTCAACAACGGATCTCTTGGTTCTGGCATCGATGAAGAACGCAGCAAAATGCGATAAGTAATGTGAATTGCAGAATTCAGTGAATCATCGAATCTTTGAACGCACATTGCGCCCGCTGGTATTCCGGCGGGCATGCCTGTTCGAGCGTCATTTCAACCCTCAAGCCCTCGGGTTTGGTGTTGGGGATCGGCTCTGCCTTCTGGCGGTGCCGCCCCCGAAATACATTGGCGGTCTCGCTGCAGCCTCCATTGCGTAGTAGCTAACACCTCGCAACTGGAACGCGGCGCGGCCATGCCGTAAAACCCCAACTTCTGAATGTTGACCT |
| MT802520 | 3074 | *Epicoccum layuense* | Qian Chen, Crous & L. Cai 2017 | Yes. Successful. | ITS 4-5 | MH643925 | 100 | 100 | 0 | CATTACCTAGAGTTTGTAGACTTCGGTCTGCTACCTCTTACCCATGTCTTTTGAGTACCTTCGTTTCCTCGGCGGGTCCGCCCGCCGATTGGACAACATTCAAACCCTTTGCAGTTGCAATCAGCGTCTGAAAAAACATAATAGTTACAACTTTCAACAACGGATCTCTTGGTTCTGGCATCGATGAAGAACGCAGCGAAATGCGATAAGTAGTGTGAATTGCAGAATTCAGTGAATCATCGAATCTTTGAACGCACATTGCGCCCCTTGGTATTCCATGGGGCATGCCTGTTCGAGCGTCATTTGTACCTTCAAGCTCTGCTTGGTGTTGGGTGTTTGTCTCGCCTCTGCGTGTAGACTCGCCTTAAAACAATTGGCAGCCGGCGTATTGATTTCGGAGCGCAGTACATCTCGCGCTTTGCACTCATAACGACGACGTCCAAAAGTACATTTTTACACTCTTGACCT |
|  | 3075 |  |  | No. Sequencing failed. |  |  |  |  |  |  |
| MT802537 | 3076 | *Fusarium avenaceum* | (Fr.) Sacc. 1886 | Yes. Successful. | ITS 4-5 | MK770801 | 100 | 100 | 0 | CATTACCGAGTTTACAACTCCCAAACCCCTGTGAACATACCTTAATGTTGCCTCGGCGGATCAGCCCGCGCCCCGTAAAACGGGACGGCCCGCCAGAGGACCCAAACTCTAATGTTTCTTATTGTAACTTCTGAGTAAAACAAACAAATAAATCAAAACTTTCAACAACGGATCTCTTGGTTCTGGCATCGATGAAGAACGCAGCAAAATGCGATAAGTAATGTGAATTGCAGAATTCAGTGAATCATCGAATCTTTGAACGCACATTGCGCCCGCTGGTATTCCGGCGGGCATGCCTGTTCGAGCGTCATTTCAACCCTCAAGCCCCCGGGTTTGGTGTTGGGGATCGGCTCTGCCTTCTGGCGGTGCCGCCCCCGAAATACATTGGCGGTCTCGCTGCAGCCTCCATTGCGTAGTAGCTAACACCTCGCAACTGGAACGCGGCGCGGCCATGCCGTAAAACCCCAACTTCTGAATGTTGACCT |
|  | 3077 |  |  | No. Triplicate PCR failed. |  |  |  |  |  |  |
| MT802538 | 3078 | *Fusarium avenaceum* | (Fr.) Sacc. 1886 | Yes. Successful. | ITS 4-5 | MK770801 | 100 | 100 | 0 | CATTACCGAGTTTACAACTCCCAAACCCCTGTGAACATACCTTAATGTTGCCTCGGCGGATCAGCCCGCGCCCCGTAAAACGGGACGGCCCGCCAGAGGACCCAAACTCTAATGTTTCTTATTGTAACTTCTGAGTAAAACAAACAAATAAATCAAAACTTTCAACAACGGATCTCTTGGTTCTGGCATCGATGAAGAACGCAGCAAAATGCGATAAGTAATGTGAATTGCAGAATTCAGTGAATCATCGAATCTTTGAACGCACATTGCGCCCGCTGGTATTCCGGCGGGCATGCCTGTTCGAGCGTCATTTCAACCCTCAAGCCCCCGGGTTTGGTGTTGGGGATCGGCTCTGCCTTCTGGCGGTGCCGCCCCCGAAATACATTGGCGGTCTCGCTGCAGCCTCCATTGCGTAGTAGCTAACACCTCGCAACTGGAACGCGGCGCGGCCATGCCGTAAAACCCCAACTTCTGAATGTTGACCT |
| MT802559 | 3079 | *Fusarium tricinctum* | (Corda) Sacc. 1886 | Yes. Successful. | ITS 4-5 | MK843921 | 100 | 100 | 0 | CATTACCGAGTTTACAACTCCCAAACCCCTGTGAACATACCTTAATGTTGCCTCGGCGGATCAGCCCGCGCCCCGTAAAACGGGACGGCCCGCCAGAGGACCCAAACTCTAATGTTTCTTATTGTAACTTCTGAGTAAAACAAACAAATAAATCAAAACTTTCAACAACGGATCTCTTGGTTCTGGCATCGATGAAGAACGCAGCAAAATGCGATAAGTAATGTGAATTGCAGAATTCAGTGAATCATCGAATCTTTGAACGCACATTGCGCCCGCTGGTATTCCGGCGGGCATGCCTGTTCGAGCGTCATTTCAACCCTCAAGCCCCCGGGTTTGGTGTTGGGGATCGGCTCTGCCCTTCTGGGCGGTGCCGCCCCCGAAATACATTGGCGGTCTCGCTGCAGCCTCCATTGCGTAGTAGCTAACACCTCGCAACTGGAACGCGGCGCGGCCATGCCGTAAAACCCCAACTTCTGAATGTTGACCT |
| MT802613 | 3080 | *Pestalotiopsis chamaeropis* | Maharachch., K.D. Hyde & Crous 2014 | Yes. Successful. | ITS 4-5 | MK247660 | 100 | 100 | 0 | CATTATAGAGTTTTTTAAACTCCCAACCCATGTGAACTTACCATTGTTGCCTCGGCAGAAGCTACCTGGTTACCTTACCTTGGAACGGCCTACCCTGTAGCGCCTTACCCTGGAACGGCCTACCCTGTAACGGCTGCCGGTGGACTACCAAACTCTTGTTATTTTATTGTAATCTGAGCGTCTTATTTTAATAAGTCAAAACTTTCAACAACGGATCTCTTGGTTCTGGCATCGATGAAGAACGCAGCGAAATGCGATAAGTAATGTGAATTGCAGAATTCAGTGAATCATCGAATCTTTGAACGCACATTGCGCCCATTAGTATTCTAGTGGGCATGCCTGTTCGAGCGTCATTTCAACCCTTAAGCCTAGCTTAGTGTTGGGAGCCTACTGCTTTTGCTAGCGGTAGCTCCTGAAATACAACGGCGGATCTGCGATATCCTCTGAGCGTAGTAATTTTTATCTCGCTTTTGACTGGAGTTGCAGCGTCTTTAGCCGCTAAACCCCCCAATTTTTAATGGTTGACCT |
| MT802621 | 3081 | *Phialocephala lagerbergii* | (Melin & Nannf.) Grünig & T.N. Sieber 2009 | Yes. Successful. | ITS 4-5 | MG586987 | 99.61 | 100 | 0 | CATTAATAAACCTAGTCGTTCGCGTACATAGGGGCAACCCTCGCGTGATGTCAGCAATACCTAGGTAACCCTTGAATAAACTACCCTTGTTGCTTTGGCGGGCCGCCGTCTCGGCCAGCGGCTTCGGCTGCTGCGCGCCCGCCAGAGGACCACAACTCTTGTTTTTAGTGATGTCTGAGTACTATATAATAGTTAAAACTTTCAACAACGGATCTCTTGGTTCTGGCATCGATGAAGAACGCAGCGAAATGCGATAAGTAATGTGAATTGCAGAATTCAGTGAATCATCGAATCTTTGAACGCACATTGCGCCCTTTGGTATTCCGAAGGGCATGCCTGTTCGAGCGTCATTATAACCACTCAAGCTTTCGCTTGGTATTGGGGTGCGCGGTTCCGCGGCCTCTAAAGTCAGTGGCGGTGCCTGTCGGCTCTACGCGTAGTAATACTCCTCGCGTCTGGGTCCGGTAGGTTGCTTGCCAACAACCCCCAAATTTTTTACAGGTTGACCT |
| MT802509 | 3082 | *Cladosporium herbarum* | (Pers.) Link 1816 | Yes. Successful. | ITS 4-5 | KY931737 | 100 | 100 | 0 | CATTACAAGAACGCCCGGGCTTCGGCCTGGTTATTCATAACCCTTTGTTGTCCGACTCTGTTGCCTCCGGGGCGACCCTGCCTTCGGGCGGGGGCTCCGGGTGGACACTTCAAACTCTTGCGTAACTTTGCAGTCTGAGTAAACTTAATTAATAAATTAAAACTTTTAACAACGGATCTCTTGGTTCTGGCATCGATGAAGAACGCAGCGAAATGCGATAAGTAATGTGAATTGCAGAATTCAGTGAATCATCGAATCTTTGAACGCACATTGCGCCCCCTGGTATTCCGGGGGGCATGCCTGTTCGAGCGTCATTTCACCACTCAAGCCTCGCTTGGTATTGGGCAACGCGGTCCGCCGCGTGCCTCAAATCGTCCGGCTGGGTCTTCTGTCCCCTAAGCGTTGTGGAAACTATTCGCTAAAGGGTGTTCGGGAGGCTACGCCGTAAAACAACCCCATTTCTAAGGTTGACCT |
|  | 3083 |  |  | No. Sequencing failed. |  |  |  |  |  |  |
|  | 3084 |  |  | No. Sequencing failed. |  |  |  |  |  |  |
| MT802521 | 3085 | *Epicoccum layuense* | Qian Chen, Crous & L. Cai 2017 | Yes. Successful. | ITS 4-5 | MH643925 | 99.79 | 100 | 0 | CATTACCTACAGTTTGTAGACTTCGGTCTGCTACCTCTTACCCATGTCTTTTGAGTACCTTCGTTTCCTCGGCGGGTCCGCCCGCCGATTGGACAACATTCAAACCCTTTGCAGTTGCAATCAGCGTCTGAAAAAACATAATAGTTACAACTTTCAACAACGGATCTCTTGGTTCTGGCATCGATGAAGAACGCAGCGAAATGCGATAAGTAGTGTGAATTGCAGAATTCAGTGAATCATCGAATCTTTGAACGCACATTGCGCCCCTTGGTATTCCATGGGGCATGCCTGTTCGAGCGTCATTTGTACCTTCAAGCTCTGCTTGGTGTTGGGTGTTTGTCTCGCCTCTGCGTGTAGACTCGCCTTAAAACAATTGGCAGCCGGCGTATTGATTTCGGAGCGCAGTACATCTCGCGCTTTGCACTCATAACGACGACGTCCAAAAGTACATTTTTACACTCTTGACCT |
| MT802514 | 3086 | *Cylindrobasidium laeve* | (Pers.) Chamuris 1984 | Yes. Successful. | ITS 4-5 | KJ652553 | 99.72 | 100 | 0 | CATTAATGAAATAATACTTTGCAGCTTCAAGTTGTTGCTGGTCTTTAACGAGACATGTGCACACTTGTTGTTGTGAATATTCATCCACCTGTGCACTTCTGTAAGTCTGGAAAACTATCATAAAGTTTACTTTGTGGTTTGAAAGGTTGCTTTTTTAAAGCTCCTTTTGACTTTCCAGGCTTATGAATTCATATACTCTTTGTATGTCTTGAATGTCTTGTTTACTGGACTTATGTCCTCTAAAACTATATACAACTTTCAACAACGGATCTCTTGGCTCTCGCATCGATGAAGAACGCAGCGAAATGCGATAACTAATGTGAATTGCAGAATTCAGTGAATCATCGAGTCTTTGAACGCACCTTGCGCCCTCTGGTATTCCGGAGGGCATGCCTGTTTGAGTGTCAGTGAAATCTCAACCTCTCATGCTTTGTTGGCATTGAGAGGATTGGATATGGAGGCTTGCTGGATTTTATTCAGCTCCTCTGAAATGTATTAGCAGGAACCATTGCTAAGGTTTACTGCAGCCGTGTGATAATTATCTTGCGGTTGAAGTAAACAATTAGTTTGTCTCACTTTTGGTCTGAAGAAATGCTCATTGAGCTTTCTTTGCTTTCTCTCTTCGGAGTGATACCTATCCAAGTGCAGATTTTAATGGTCTTATCCAGCTTCTAACCATCTGGAAACAGATAACACTTGACCATTTGACCT |
|  | 3087 |  |  | No. Sequencing failed. |  |  |  |  |  |  |
| MT802522 | 3088 | *Epicoccum layuense* | Qian Chen, Crous & L. Cai 2017 | Yes. Successful. | ITS 4-5 | MH643925 | 99.79 | 100 | 0 | CATTACCTAGAAGTTTGTAGACTTCGGTCTGCTACCTCTTACCCATGTCTTTTGAGTACCTTCGTTTCCTCGGCGGGTCCGCCCGCCGATTGGACAACATTCAAACCCTTTGCAGTTGCAATCAGCGTCTGAAAAAACATAATAGTTACAACTTTCAACAACGGATCTCTTGGTTCTGGCATCGATGAAGAACGCAGCGAAATGCGATAAGTAGTGTGAATTGCAGAATTCAGTGAATCATCGAATCTTTGAACGCACATTGCGCCCCTTGGTATTCCATGGGGCATGCCTGTTCGAGCGTCATTTGTACCTTCAAGCTCTGCTTGGTGTTGGGTGTTTGTCTCGCCTCTGCGTGTAGACTCGCCTTAAAACAATTGGCAGCCGGCGTATTGATTTCGGAGCGCAGTACATCTCGCGCTTTGCACTCATAACGACGACGTCCAAAAGTACATTTTTACACTCTTGACCT |
| MT802461 | 3089 | *Alternaria alternata* | (Fr.) Keissl. 1912 | Yes. Successful. | ITS 4-5 | MK881030 | 100 | 100 | 0 | CATTACACAAATATGAAGGCGGGCTGGAACCTCTCGGGGTTACAGCCTTGCTGAATTATTCACCCTTGTCTTTTGCGTACTTCTTGTTTCCTTGGTGGGTTCGCCCACCACTAGGACAAACATAAACCTTTTGTAATTGCAATCAGCGTCAGTAACAAATTAATAATTACAACTTTCAACAACGGATCTCTTGGTTCTGGCATCGATGAAGAACGCAGCGAAATGCGATAAGTAGTGTGAATTGCAGAATTCAGTGAATCATCGAATCTTTGAACGCACATTGCGCCCTTTGGTATTCCAAAGGGCATGCCTGTTCGAGCGTCATTTGTACCCTCAAGCTTTGCTTGGTGTTGGGCGTCTTGTCTCTAGCTTTGCTGGAGACTCGCCTTAAAGTAATTGGCAGCCGGCCTACTGGTTTCGGAGCGCAGCACAAGTCGCACTCTCTATCAGCAAAGGTCTAGCATCCATTAAGCCTTTTTTTCAACTTTTGACCT |
| MT802505 | 3090 | *Cladosporium herbarum* | (Pers.) Link 1816 | Yes. Successful. | ITS 4-5 | MK722293 | 100 | 100 | 0 | CATTACAAGAACGCCCGGGCTTCGGCCTGGTTATTCATAACCCTTTGTTGTCCGACTCTGTTGCCTCCGGGGCGACCCTGCCTTCGGGCGGGGGCTCCGGGTGGACACTTCAAACTCTTGCGTAACTTTGCAGTCTGAGTAAACTTAATTAATAAATTAAAACTTTTAACAACGGATCTCTTGGTTCTGGCATCGATGAAGAACGCAGCGAAATGCGATAAGTAATGTGAATTGCAGAATTCAGTGAATCATCGAATCTTTGAACGCACATTGCGCCCCCTGGTATTCCGGGGGGCATGCCTGTTCGAGCGTCATTTCACCACTCAAGCCTCGCTTGGTATTGGGCAACGCGGTCCGCCGCGTGCCTCAAATCGTCCGGCTGGGTCTTCTGTCCCCTAAGCGTTGTGGAAACTATTCGCTAAAGGGTGTTCGGGAGGCTACGCCGTAAAACAACCCCATTTCTAAGGTTGACCT |
| MT802486 | 3091 | *Botrytis cinerea* | Pers. 1801 | Yes. Successful. | ITS 4-5 | MH346332 | 100 | 100 | 0 | CATTACAGAGTTCATGCCCGAAAGGGTAGACCTCCCACCCTTGTGTATTATTACTTTGTTGCTTTGGCGAGCTGCCTTCGGGCCTTGTATGCTCGCCAGAGAATACCAAAACTCTTTTTATTAATGTCGTCTGAGTACTATATAATAGTTAAAACTTTCAACAACGGATCTCTTGGTTCTGGCATCGATGAAGAACGCAGCGAAATGCGATAAGTAATGTGAATTGCAGAATTCAGTGAATCATCGAATCTTTGAACGCACATTGCGCCCCTTGGTATTCCGGGGGGCATGCCTGTTCGAGCGTCATTTCAACCCTCAAGCTTAGCTTGGTATTGAGTCTATGTCAGTAATGGCAGGCTCTAAAATCAGTGGCGGCGCCGCTGGGTCCTGAACGTAGTAATATCTCTCGTTACAGGTTCTCGGTGTGCTTCTGCCAAAACCCAAATTTTTCTATGGTTGACCT |
| MT802539 | 3092 | *Fusarium avenaceum* | (Fr.) Sacc. 1886 | Yes. Successful. | ITS 4-5 | MK770801 | 100 | 100 | 0 | CATTACCGAGTTTACAACTCCCAAACCCCTGTGAACATACCTTAATGTTGCCTCGGCGGATCAGCCCGCGCCCCGTAAAACGGGACGGCCCGCCAGAGGACCCAAACTCTAATGTTTCTTATTGTAACTTCTGAGTAAAACAAACAAATAAATCAAAACTTTCAACAACGGATCTCTTGGTTCTGGCATCGATGAAGAACGCAGCAAAATGCGATAAGTAATGTGAATTGCAGAATTCAGTGAATCATCGAATCTTTGAACGCACATTGCGCCCGCTGGTATTCCGGCGGGCATGCCTGTTCGAGCGTCATTTCAACCCTCAAGCCCCCGGGTTTGGTGTTGGGGATCGGCTCTGCCTTCTGGCGGTGCCGCCCCCGAAATACATTGGCGGTCTCGCTGCAGCCTCCATTGCGTAGTAGCTAACACCTCGCAACTGGAACGCGGCGCGGCCATGCCGTAAAACCCCAACTTCTGAATGTTGACCT |
|  | 3093 | *Epicoccum nigrum* | Link 1816 | No. ID based on morphology comparison with similar sequenced cultures. |  |  |  |  |  |  |
|  | 3094 |  |  | No. Sequencing failed. |  |  |  |  |  |  |
| MT802558 | 3095 | *Fusarium sporotrichioides* | Sherb. 1915 | Yes. Successful. | ITS 4-5 | MK729580 | 100 | 100 | 0 | CATTACCGAGTTTACAACTCCCAAACCCCTGTGAACATACCTTTATGTTGCCTCGGCGGATCAGCCCGCGCCCCGTAAAACGGGACGGCCCGCCGCAGGAAACCCTAAACTCTGTTTTTAGTGGAACTTCTGAGTATAAAAAACAAATAAATCAAAACTTTCAACAACGGATCTCTTGGTTCTGGCATCGATGAAGAACGCAGCAAAATGCGATAAGTAATGTGAATTGCAGAATTCAGTGAATCATCGAATCTTTGAACGCACATTGCGCCCGCCAGTATTCTGGCGGGCATGCCTGTTCGAGCGTCATTTCAACCCTCAAGCCCAGCTTGGTGTTGGGATCTGTGTGCAAACACAGTCCCCAAATTGATTGGCGGTCACGTCGAGCTTCCATAGCGTAGTAATTTACACATCGTTACTGGTAATCGTCGCGGCCACGCCGTTAAACCCCAACTTCTGAATGTTGACCT |
| MT802546 | 3096 | *Fusarium lateritium* | Nees 1816 | Yes. Successful. | ITS 4-5 | MG066631 | 100 | 100 | 0 | CATTACCGAGTTTACAACTCCCAAACCCCTGTGAACATACCTTAATGTTGCCTCGGCGGATCAGCCCGCTCCCCGTAAAACGGGACGGCCCGCCAGAGGACCCAAACTCTAATGTTTCTTATTGTAACTTCTGAGTAAAACAAACAAATAAATCAAAACTTTCAACAACGGATCTCTTGGTTCTGGCATCGATGAAGAACGCAGCAAAATGCGATAAGTAATGTGAATTGCAGAATTCAGTGAATCATCGAATCTTTGAACGCACATTGCGCCCGCTGGTATTCCGGCGGGCATGCCTGTTCGAGCGTCATTTCAACCCTCAAGCCCCCGGGTTTGGTGTTGGGGATCGGCTCTGCCTCACGGCGGTGCCGCCCCCGAAATACATTGGCGGTCTCGCTGCAGCCTCCATTGCGTAGTAGCTAACACCTCGCAACTGGAACGCGGCGCGGCCATGCCGTAAAACCCCAACTTCTGAATGTTGACCT |
|  | 3098 | *Epicoccum layuense* | Qian Chen, Crous & L. Cai 2017 | Yes. Successful. | ITS 4-5 | MH643925 | 99.79 | 100 | 0 | CATTACCTAGAAGTTTGTAGACTTCGGTCTGCTACCTCTTACCCATGTCTTTTGAGTACCTTCGTTTCCTCGGCGGGTCCGCCCGCCGATTGGACAACATTCAAACCCTTTGCAGTTGCAATCAGCGTCTGAAAAAACATAATAGTTACAACTTTCAACAACGGATCTCTTGGTTCTGGCATCGATGAAGAACGCAGCGAAATGCGATAAGTAGTGTGAATTGCAGAATTCAGTGAATCATCGAATCTTTGAACGCACATTGCGCCCCTTGGTATTCCATGGGGCATGCCTGTTCGAGCGTCATTTGTACCTTCAAGCTCTGCTTGGTGTTGGGTGTTTGTCTCGCCTCTGCGTGTAGACTCGCCTTAAAACAATTGGCAGCCGGCGTATTGATTTCGGAGCGCAGTACATCTCGCGCTTTGCACTCATAACGACGACGTCCAAAAGTACATTTTTACACTCTTGACCT |
| MT802643 | 3099 | *Zalerion maritima* | (Linder) Anastasiou 1963 | Yes. Successful. | ITS 4-5 | KT347217 | 100 | 100 | 0 | CATTACTGAGTTACAAAAAAACTCCCAAACCCTTCTGTGGACCTACCTAAACGTTGCCTCGGCGGGCTCGCCCGCCGGAGGCCCACCAAAAATCCTATGCAGAAACGAATCTCTGAGTGGCTTCAGGCCTATTTTGAAACAAAAATAAGTCAAAACTTTCAGCAACGGATCTCTTGGTTCTGGCATCGATGAAGAACGCAGCGAAATGCGATAAGTAATGTGAATTGCAGAATTCAGTGAATCATCGAATCTTTGAACGCACATTGCGCCCGCCGGTATTCCGGCGGGCATGCCTGTTCGAGCGTCATTAGAAACCCCTCGGGCCTCCTCCTCCCCGGAGGACGGCTCGGCGTTGGTGCTCCGCGCCGGAAGACCCCCTCGCGGGTCGAGCCGCGGGCGCCCAAATGCAGAGGCGGACGCACCCGAGCCCCCCAGCGCAGTACAACTGTCTTCGCTGACGGCGGACGGGAGCGGTACCACAGCCCCCCCAACCACACTTCTTTTGAACTTTGACCT |
|  | 3100 |  |  | No. Triplicate PCR failed. |  |  |  |  |  |  |
| MT802494 | 3101 | *Cadophora malorum* | (Kidd & Beaumont) W. Gams 2000 | Yes. Successful. | ITS 4-5 | LC085207 | 100 | 100 | 0 | CATTACTAGAGCAAAGGATAGGCAGCGCCCCACCGAAGCTTGCTTCGTGGGGTGTCGAGCCGTCGACCCTCTCGGAGAAGGTCGGTCCTGAACTCCACCCTTGAATAAATTACCTTTGTTGCTTTGGCGGGCCGCCTCGCGCCAGCGGCTTCGGCTGTTGAGTGCCCGCCAGAGGACCACAACTCTTGTTTTTAGTGATGTCTGAGTACTATATAATAGTTAAAACTTTCAACAACGGATCTCTTGGTTCTGGCATCGATGAAGAACGCAGCGAAATGCGATAAGTAATGTGAATTGCAGAATTCAGTGAATCATCGAATCTTTGAACGCACATTGCGCCCTCTGGTATTCCGGGGGGCATGCCTGTTCGAGCGTCATTATAACCACTCAAGCTCTCGCTTGGTATTGGGGTTCGCGGTTCCGCGGCCCCTAAAATCAGTGGCGGTGCCTGTCGGCTCTACGCGTAGTAATACTCCTCGCGTCTGGGTCCGGTAGGTCTACTTGCCAGCAACCCCCAATTTTTACAGGTTGACCT |
|  | 3102 | *Sarocladium strictum* | (W. Gams) Summerb. 2011 | No. ID based on morphology. |  |  |  |  |  |  |
|  | 3103 | *Sarocladium strictum* | (W. Gams) Summerb. 2011 | No. Triplicate PCR failed. ID based on morphology comparison with similar sequenced cultures. |  |  |  |  |  |  |
|  | 3104 | *Sarocladium strictum* | (W. Gams) Summerb. 2011 | No. ID based on morphology comparison with similar sequenced cultures. |  |  |  |  |  |  |
|  | 3105 | *Sarocladium strictum* | (W. Gams) Summerb. 2011 | No. ID based on morphology comparison with similar sequenced cultures. |  |  |  |  |  |  |
| MT802528 | 3106 | *Epicoccum nigrum* | Link 1816 | Yes. Successful. | ITS 4-5 | MH643926 | 100 | 100 | 0 | CATTACCTAGAGTTTGTAGACTTCGGTCTGCTACCTCTTACCCATGTCTTTTGAGTACCTTCGTTTCCTCGGCGGGTCCGCCCGCCGATTGGACAACATTCAAACCCTTTGCAGTTGCAATCAGCGTCTGAAAAAACATAATAGTTACAACTTTCAACAACGGATCTCTTGGTTCTGGCATCGATGAAGAACGCAGCGAAATGCGATAAGTAGTGTGAATTGCAGAATTCAGTGAATCATCGAATCTTTGAACGCACATTGCGCCCCTTGGTATTCCATGGGGCATGCCTGTTCGAGCGTCATTTGTACCTTCAAGCTCTGCTTGGTGTTGGGTGTTTGTCTCGCCTCTGCGTGTAGACTCGCCTTAAAACAATTGGCAGCCGGCGTATTGATTTCGGAGCGCAGTACATCTCGCGCTTTGCACTCACAACGACGACGTCCAAAAGTACATTTTTACACTCTTGACCT |
| MT802506 | 3107 | *Cladosporium herbarum* | (Pers.) Link 1816 | Yes. Successful. | ITS 4-5 | KY931737 | 100 | 100 | 0 | CATTACAAGAACGCCCGGGCTTCGGCCTGGTTATTCATAACCCTTTGTTGTCCGACTCTGTTGCCTCCGGGGCGACCCTGCCTTCGGGCGGGGGCTCCGGGTGGACACTTCAAACTCTTGCGTAACTTTGCAGTCTGAGTAAACTTAATTAATAAATTAAAACTTTTAACAACGGATCTCTTGGTTCTGGCATCGATGAAGAACGCAGCGAAATGCGATAAGTAATGTGAATTGCAGAATTCAGTGAATCATCGAATCTTTGAACGCACATTGCGCCCCCTGGTATTCCGGGGGGCATGCCTGTTCGAGCGTCATTTCACCACTCAAGCCTCGCTTGGTATTGGGCAACGCGGTCCGCCGCGTGCCTCAAATCGTCCGGCTGGGTCTTCTGTCCCCTAAGCGTTGTGGAAACTATTCGCTAAAGGGTGTTCGGGAGGCTACGCCGTAAAACAACCCCATTTCTAAGGTTGACCT |
| MT802594 | 3108 | *Paradendryphiella salina* | (G.K. Sutherl.) Woudenb. & Crous 2013 | Yes. Successful. | ITS 4-5 | MH857928 | 100 | 100 | 0 | CATTACACAATATGAAAGCGGGTTGGGACCTCATCTCGGTGGGGGCTCCAGCTTGTCTGAATTATTCACCCATGTCTTTTGCGCACTTCTTGTTTCCTGGGCGGGTTCGCCCGCCACCAGGACCCAACCATAAACCTTTTTTTGTAATTGCAATCAGCGTCAGTAAACAATGTAATTATTACAACTTTCAACAACGGATCTCTTGGTTCTGGCATCGATGAAGAACGCAGCGAAATGCGATACGTAGTGTGAATTGCAGAATTCAGTGAATCATCGAATCTTTGAACGCACATTGCGCCCTTTGGTATTCCAAAGGGCATGCCTGTTCGAGCGTCATTTGTACCCTCAAGCTTTGCTTGGTGTTGGGCGTCTTTGTCTCTCACGAGACTCGCCTTAAAATGATTGGCAGCCGGCCTACTGGTTTCGGAGCGCAGCACAATCTTGCACTTCTGATCAGCCATGGTTGAGCATCCATCAAGACCACATTTTTCTCACTTTTGACCT |
|  | 3109 |  |  | No. Triplicate PCR failed. |  |  |  |  |  |  |
| MT802495 | 3110 | *Cadophora malorum* | (Kidd & Beaumont) W. Gams 2000 | Yes. Successful. | ITS 4-5 | LC085207 | 100 | 100 | 0 | CATTACTAGAACAAAGGATAGGCAGCGCCCCACCGAAGCTTGCTTCGTGGGGTGTCGAGCCGTCGACCCTCTCGGAGAAGGTCGGTCCTGAACTCCACCCTTGAATAAATTACCTTTGTTGCTTTGGCGGGCCGCCTCGCGCCAGCGGCTTCGGCTGTTGAGTGCCCGCCAGAGGACCACAACTCTTGTTTTTAGTGATGTCTGAGTACTATATAATAGTTAAAACTTTCAACAACGGATCTCTTGGTTCTGGCATCGATGAAGAACGCAGCGAAATGCGATAAGTAATGTGAATTGCAGAATTCAGTGAATCATCGAATCTTTGAACGCACATTGCGCCCTCTGGTATTCCGGGGGGCATGCCTGTTCGAGCGTCATTATAACCACTCAAGCTCTCGCTTGGTATTGGGGTTCGCGGTTCCGCGGCCCCTAAAATCAGTGGCGGTGCCTGTCGGCTCTACGCGTAGTAATACTCCTCGCGTCTGGGTCCGGTAGGTCTACTTGCCAGCAACCCCCAATTTTTACAGGTTGACCT |
|  | 3111 | *Epicoccum nigrum* | Link 1816 | No. Triplicate PCR failed. ID based on morphology. |  |  |  |  |  |  |
|  | 3112 |  |  | No. Sequencing failed. |  |  |  |  |  |  |
| MT802523 | 3113 | *Epicoccum layuense* | Qian Chen, Crous & L. Cai 2017 | Yes. Successful. | ITS 4-5 | MH643925 | 100 | 100 | 0 | CATTACCTAGAGTTTGTAGACTTCGGTCTGCTACCTCTTACCCATGTCTTTTGAGTACCTTCGTTTCCTCGGCGGGTCCGCCCGCCGATTGGACAACATTCAAACCCTTTGCAGTTGCAATCAGCGTCTGAAAAAACATAATAGTTACAACTTTCAACAACGGATCTCTTGGTTCTGGCATCGATGAAGAACGCAGCGAAATGCGATAAGTAGTGTGAATTGCAGAATTCAGTGAATCATCGAATCTTTGAACGCACATTGCGCCCCTTGGTATTCCATGGGGCATGCCTGTTCGAGCGTCATTTGTACCTTCAAGCTCTGCTTGGTGTTGGGTGTTTGTCTCGCCTCTGCGTGTAGACTCGCCTTAAAACAATTGGCAGCCGGCGTATTGATTTCGGAGCGCAGTACATCTCGCGCTTTGCACTCATAACGACGACGTCCAAAAGTACATTTTTACACTCTTGACCT |
|  | 3114 |  |  | No. Sequencing failed. |  |  |  |  |  |  |
| MT802502 | 3115 | *Cladosporium cladosporioides* | (Fresen.) G.A. de Vries 1952 | Yes. Successful. | ITS 4-5 | MK012416 | 99.79 | 100 | 0 | CATTACAAGTGACCCCGGTTTTACCACCGGGATGTTCATAACCCTTTGTTGTCCGACTCTGTTGCCTCCGGGGCGACCCTGCCTTCGGGCGGGGGCTCCGGGTGGACACTTCAAACTCTTGCGTAACTTTGCAGTCTGAGTAAACTTAATTAATAAATTAAAACTTTTAACAACGGATCTCTTGGTTCTGGCATCGATGAAGAACGCAGCGAAATGCGATAAGTAATGTGAATTGCAGAATTCAGTGAATCATCGAATCTTTGAACGCACATTGCGCCCCCTGGTATTCCGGGGGGCATGCCTGTTCGAGCGTCATTTCACCACTCAAGCCTCGCTTGGTATTGGGCAACGCGGTCCGCCGCGTGCCTCAAATCGACCGGCTGGGTCTTCTGTCCCCTAAGCGTTGTGGAAACTATTCGCTAAAGGGTGTTCGGGAGGCTACGCCGTAAAACAACCCCATTTCTAAGGTTGACCT |
| MT802524 | 3116 | *Epicoccum layuense* | Qian Chen, Crous & L. Cai 2017 | Yes. Successful. | ITS 4-5 | MH643925 | 99.79 | 100 | 0 | CATTACCTACAGTTTGTAGACTTCGGTCTGCTACCTCTTACCCATGTCTTTTGAGTACCTTCGTTTCCTCGGCGGGTCCGCCCGCCGATTGGACAACATTCAAACCCTTTGCAGTTGCAATCAGCGTCTGAAAAAACATAATAGTTACAACTTTCAACAACGGATCTCTTGGTTCTGGCATCGATGAAGAACGCAGCGAAATGCGATAAGTAGTGTGAATTGCAGAATTCAGTGAATCATCGAATCTTTGAACGCACATTGCGCCCCTTGGTATTCCATGGGGCATGCCTGTTCGAGCGTCATTTGTACCTTCAAGCTCTGCTTGGTGTTGGGTGTTTGTCTCGCCTCTGCGTGTAGACTCGCCTTAAAACAATTGGCAGCCGGCGTATTGATTTCGGAGCGCAGTACATCTCGCGCTTTGCACTCATAACGACGACGTCCAAAAGTACATTTTTACACTCTTGACCT |
| MT802525 | 3117 | *Epicoccum layuense* | Qian Chen, Crous & L. Cai 2017 | Yes. Successful. | ITS 4-5 | MH643925 | 100 | 100 | 0 | CATTACCTAGAGTTTGTAGACTTCGGTCTGCTACCTCTTACCCATGTCTTTTGAGTACCTTCGTTTCCTCGGCGGGTCCGCCCGCCGATTGGACAACATTCAAACCCTTTGCAGTTGCAATCAGCGTCTGAAAAAACATAATAGTTACAACTTTCAACAACGGATCTCTTGGTTCTGGCATCGATGAAGAACGCAGCGAAATGCGATAAGTAGTGTGAATTGCAGAATTCAGTGAATCATCGAATCTTTGAACGCACATTGCGCCCCTTGGTATTCCATGGGGCATGCCTGTTCGAGCGTCATTTGTACCTTCAAGCTCTGCTTGGTGTTGGGTGTTTGTCTCGCCTCTGCGTGTAGACTCGCCTTAAAACAATTGGCAGCCGGCGTATTGATTTCGGAGCGCAGTACATCTCGCGCTTTGCACTCATAACGACGACGTCCAAAAGTACATTTTTACACTCTTGACCT |
|  | 3118 |  |  | No. Sequencing failed. |  |  |  |  |  |  |
| MT802484 | 3119 | *Boeremia exigua* | (Desm.) Aveskamp, Gruyter & Verkley 2010 | Yes. Successful. | ITS 4-5 | MK584540 | 100 | 100 | 0 | CATTACCTAGAGTTGTAGGCTTTGCCTACCATCTCTTACCCATGTCTTTTGAGTACCTTCGTTTCCTCGGCGGGTCCGCCCGCCGATTGGACAAACTTAAACCCTTTGTAATTGAAATCAGCGTCTGAAAAAACATAATAGTTACAACTTTCAACAACGGATCTCTTGGTTCTGGCATCGATGAAGAACGCAGCGAAATGCGATAAGTAGTGTGAATTGCAGAATTCAGTGAATCATCGAATCTTTGAACGCACATTGCGCCCCTTGGTATTCCATGGGGCATGCCTGTTCGAGCGTCATTTGTACCTTCAAGCTCTGCTTGGTGTTGGGTGTTTGTCTCGCCTTTGCGTGTAGACTCGCCTTAAAACAATTGGCAGCCGGCGTATTGATTTCGGAGCGCAGTACATCTCGCGCTTTGCACTCATAACGACGACGTCCAAAAAGTACTTTTTACACTCTTGACCT |
| MT802619 | 3120 | *Septoriella vagans* | (Niessl) Y. Marín & Crous 2019 | Yes. Successful. | ITS 4-5 | KT896646 | 99.81 | 100 | 0 | CATTACATTCAAGTAGCTTGCTACTGGTCGGGAGGCGCTGTAACTCCGCATAGTATTAATTTACTGATGAGCGGCAGGCCCTCTGTCTGTACCCTTGTCTTTTGCGCACTCATGTTTCCTCGGCGGGCTTGCCCGCCGATTGGACAAAACTATAACCTTTTTAATTTTCAATCAGCGTCTGAAAAAACTTAATAATTACAACTTTCAACAACGGATCTCTTGGTTCTGGCATCGATGAAGAACGCAGCGAAATGCGATAAGTAGTGTGAATTGCAGAATTCAGTGAATCATCGAATCTTTGAACGCACATTGCGCCCCTTGGTATTCCATGGGGCATGCCTGTTCGAGCGTCATTTGTACCCTCAAGCTCTGCTTGGTGTTGGGTGTTTGTCCTCTCCTTTGCGTTTGGACTCGCCTTAAAGCAATTGGCAGCCAGTGTTTTGGTATTGAAGCGCAGCACATTTTGCGATTCTAGCCGATAATACTTGCGTCCATAAGCCTTTTTTAACTTTTGACCT |
|  | 3121 |  |  | No. Sequencing failed. |  |  |  |  |  |  |
|  | 3122 |  |  | No. Sequencing failed. |  |  |  |  |  |  |
| MT802595 | 3123 | *Paradendryphiella salina* | (G.K. Sutherl.) Woudenb. & Crous 2013 | Yes. Successful. | ITS 4-5 | MH857928 | 100 | 100 | 0 | ATTATTCACCCATGTCTTTTGCGCACTTCTTGTTTCCTGGGCGGGTTCGCCCGCCACCAGGACCCAACCATAAACCTTTTTTTGTAATTGCAATCAGCGTCAGTAAACAATGTAATTATTACAACTTTCAACAACGGATCTCTTGGTTCTGGCATCGATGAAGAACGCAGCGAAATGCGATACGTAGTGTGAATTGCAGAATTCAGTGAATCATCGAATCTTTGAACGCACATTGCGCCCTTTGGTATTCCAAAGGGCATGCCTGTTCGAGCGTCATTTGTACCCTCAAGCTTTGCTTGGTGTTGGGCGTCTTTGTCTCTCACGAGACTCGCCTTAAAATGATTGGCAGCCGGCCTACTGGTTTCGGAGCGCAGCACAATCTTGCACTTCTGATCAGCCATGGTTGAGCATCCATCAAGACCACATTTTTCTCACTTTTGACCT |
|  | 3124 |  |  | No. Sequencing failed. |  |  |  |  |  |  |
|  | 3125 |  |  | No. Sequencing failed. |  |  |  |  |  |  |
| MT802611 | 3126 | *Penicillium brevistipitatum* | L. Wang & W.Y. Zhuang 2005 | Yes. Successful. | ITS 4-5 | MG490883 | 99.8 | 100 | 0 | CATTACCGAGTGAGGGCCCTTTGGGTCCAACCTCCCACCCGTGTTTATTTACCTTGGTTGCTTCGGCGGGCCCGCCTTAACTGGCCGCCGGGGGGCTTACGCCCCCGGGCCCGCGCCCGCCGAAGACACCCTCGAACTCTGTCTGAAGATTGTAGTCTGAGTGAAAATATAAATTATTTAAAACTTTCAACAACGGATCTCTTGGTTCCGGCATCGATGAAGAACGCAGCGAAATGCGATACGTAATGTGAATTGCAAATTCAGTGAATCATCGAGTCTTTGAACGCACATTGCGCCCCCTGGTATTCCGGGGGGCATGCCTGTCCGAGCGTCATTGCTGCCCTCAAGCCCGGCTTGTGTGTTGGGCCCCGTCCTCCGATTCCGGGGGACGGGCCCGAAAGGCAGCGGCGGCACCGCGTCCGGTCCTCGAGCGTATGGGGCTTTGTCACCCGCTCTGTAGGCCCGGCCGGCGCTTGCCGATCAACCCAAATTTTTATCCAGGTTGACCT |
| MT802596 | 3127 | *Paradendryphiella salina* | (G.K. Sutherl.) Woudenb. & Crous 2013 | Yes. Successful. | ITS 4-5 | MH857928 | 100 | 100 | 0 | ATTATTCACCCATGTCTTTTGCGCACTTCTTGTTTCCTGGGCGGGTTCGCCCGCCACCAGGACCCAACCATAAACCTTTTTTTGTAATTGCAATCAGCGTCAGTAAACAATGTAATTATTACAACTTTCAACAACGGATCTCTTGGTTCTGGCATCGATGAAGAACGCAGCGAAATGCGATACGTAGTGTGAATTGCAGAATTCAGTGAATCATCGAATCTTTGAACGCACATTGCGCCCTTTGGTATTCCAAAGGGCATGCCTGTTCGAGCGTCATTTGTACCCTCAAGCTTTGCTTGGTGTTGGGCGTCTTTGTCTCTCACGAGACTCGCCTTAAAATGATTGGCAGCCGGCCTACTGGTTTCGGAGCGCAGCACAATCTTGCACTTCTGATCAGCCATGGTTGAGCATCCATCAAGACCACATTTTTCTCACTTTTGACCT |
| MT802467 | 3128 | *Alternaria chlamydospora* | Mouch. 1973 | Yes. Successful. | ITS 4-5 | MK592742 | 100 | 100 | 0 | ATTATTCACCCGTGTCTTTTGCGTACTTCTTGTTTCCTTGGTGGGCTCGCCCACCACAAGGACAACCCCATAAACCTTTTTGTAATAGCAATCAGCGTCAGTAACAATGTAATAATTACAACTTTCAACAACGGATCTCTTGGTTCTGGCATCGATGAAGAACGCAGCGAAATGCGATACGTAGTGTGAATTGCAGAATTCAGTGAATCATCGAATCTTTGAACGCACATTGCGCCCTTTGGTATTCCAAAGGGCATGCCTGTTCGAGCGTCATTTGTACCCTCAAGCTTTGCTTGGTGTTGGGCGTCTTGTCTCCAGTTCGCTGGAGACTCGCCTTAAAGTCATTGGCAGCCGGCCTACTGGTTTCGGAGCGCAGCACAAGTCGCGCTCTCATCCAGCCAAGGTCAGCGTCCAGTAAGCCTTTTTTTCAACTTTTGACCT |
| MT802468 | 3129 | *Alternaria chlamydospora* | Mouch. 1973 | Yes. Successful. | ITS 4-5 | MH860542 | 100 | 100 | 0 | CATTACACAATAAGAAGGCGGGCTGGATACCCCCAGCAGTGCGTTGCTTCGCGGCGTGCGCTGTTGGGCCGGCCTTGCTGAATTATTCACCCGTGTCTTTTGCGTACTTCTTGTTTCCTTGGTGGGCTCGCCCACCACAAGGACAACCCCATAAACCTTTTTGTAATAGCAATCAGCGTCAGTAACAATGTAATAATTACAACTTTCAACAACGGATCTCTTGGTTCTGGCATCGATGAAGAACGCAGCGAAATGCGATACGTAGTGTGAATTGCAGAATTCAGTGAATCATCGAATCTTTGAACGCACATTGCGCCCTTTGGTATTCCAAAGGGCATGCCTGTTCGAGCGTCATTTGTACCCTCAAGCTTTGCTTGGTGTTGGGCGTCTTGTCTCCAGTTCGCTGGAGACTCGCCTTAAAGTCATTGGCAGCCGGCCTACTGGTTTCGGAGCGCAGCACAAGTCGCGCTCTCATCCAGCCAAGGTCAGCGTCCAGTAAGCCTTTTTTTCAACTTTTGACCT |
| MT802597 | 3130 | *Paradendryphiella salina* | (G.K. Sutherl.) Woudenb. & Crous 2013 | Yes. Successful. | ITS 4-5 | MH857928 | 100 | 100 | 0 | ATTATTCACCCATGTCTTTTGCGCACTTCTTGTTTCCTGGGCGGGTTCGCCCGCCACCAGGACCCAACCATAAACCTTTTTTTGTAATTGCAATCAGCGTCAGTAAACAATGTAATTATTACAACTTTCAACAACGGATCTCTTGGTTCTGGCATCGATGAAGAACGCAGCGAAATGCGATACGTAGTGTGAATTGCAGAATTCAGTGAATCATCGAATCTTTGAACGCACATTGCGCCCTTTGGTATTCCAAAGGGCATGCCTGTTCGAGCGTCATTTGTACCCTCAAGCTTTGCTTGGTGTTGGGCGTCTTTGTCTCTCACGAGACTCGCCTTAAAATGATTGGCAGCCGGCCTACTGGTTTCGGAGCGCAGCACAATCTTGCACTTCTGATCAGCCATGGTTGAGCATCCATCAAGACCACATTTTTCTCACTTTTGACCT |
| MT802598 | 3131 | *Paradendryphiella salina* | (G.K. Sutherl.) Woudenb. & Crous 2013 | Yes. Successful. | ITS 4-5 | MH857928 | 100 | 100 | 0 | ATTATTCACCCATGTCTTTTGCGCACTTCTTGTTTCCTGGGCGGGTTCGCCCGCCACCAGGACCCAACCATAAACCTTTTTTTGTAATTGCAATCAGCGTCAGTAAACAATGTAATTATTACAACTTTCAACAACGGATCTCTTGGTTCTGGCATCGATGAAGAACGCAGCGAAATGCGATACGTAGTGTGAATTGCAGAATTCAGTGAATCATCGAATCTTTGAACGCACATTGCGCCCTTTGGTATTCCAAAGGGCATGCCTGTTCGAGCGTCATTTGTACCCTCAAGCTTTGCTTGGTGTTGGGCGTCTTTGTCTCTCACGAGACTCGCCTTAAAATGATTGGCAGCCGGCCTACTGGTTTCGGAGCGCAGCACAATCTTGCACTTCTGATCAGCCATGGTTGAGCATCCATCAAGACCACATTTTTCTCACTTTTGACCT |
| MT802608 | 3132 | *Parengyodontium album* | (Limber) C.C. Tsang, J.F.W. Chan, W.M. Pong, J.H.K. Chen, A.H.Y. Ngan, M. Cheung, C.K.C. Lai, D.N.C. Tsang, S.K.P. Lau & P.C.Y. Woo 2016 | Yes. Successful. | ITS 4-5 | MK626713 | 100 | 100 | 0 | CATTACCGAGTTTACAACTCCCAAACCCATGTGAACATACCTTTACGTTGCTTCGGCGGAGCCGCCCCGGCGCCCGGAACCTCTTCGGTTTCGCGGCCCGGAACCAGGCGCCCGCCGGAGGCCACAAACTCTTTTGTTTTTACAGTTTCTTCTGAGTGTGCCGCAAGGCAAAATACAAATGAATCAAAACTTTCAACAACGGATCTCTTGGTTCTGGCATCGATGAAGAACGCAGCGAAATGCGATAAGTAATGTGAATTGCAGAATTCAGTGAATCATCGAATCTTTGAACGCACATTGCGCCCGCCAGAATTCTGGCGGGCATGCCTGTTCGAGCGTCATTTCAACCCTCGAGCTCCCCTCTTTTGGGAGAGCCCGGCGTTGGGGACCCGGCGCTAACACCGCCGGCCCCGAAATGGAGTGGCGGCCCGTCCGCGGCGACCTCTGCGTAGTAATATCCACTCGCACCGGGACCCGGGCGCGGCCACGCCGTTAAACACCCCACCTTCCGAATGTTGACCT |
| MT802644 | 3133 | *Zalerion maritima* | (Linder) Anastasiou 1963 | Yes. Successful. | ITS 4-5 | KT347217 | 100 | 100 | 0 | TAAACGTTGCCTCGGCGGGCTCGCCCGCCGGAGGCCCACCAAAAATCCTATGCAGAAACGAATCTCTGAGTGGCTTCAGGCCTATTTTGAAACAAAAATAAGTCAAAACTTTCAGCAACGGATCTCTTGGTTCTGGCATCGATGAAGAACGCAGCGAAATGCGATAAGTAATGTGAATTGCAGAATTCAGTGAATCATCGAATCTTTGAACGCACATTGCGCCCGCCGGTATTCCGGCGGGCATGCCTGTTCGAGCGTCATTAGAAACCCCTCGGGCCTCCTCCTCCCCGGAGGACGGCTCGGCGTTGGTGCTCCGCGCCGGAAGACCCCCTCGCGGGTCGAGCCGCGGGCGCCCAAATGCAGAGGCGGACGCACCCGAGCCCCCCAGCGCAGTACAACTGTCTTCGCTGACGGCGGACGGGAGCGGTACCACAGCCCCCCCAACCACACTTCTTTTGAACTTTGACCT |
| MT802469 | 3134 | *Alternaria chlamydospora* | Mouch. 1973 | Yes. Successful. | ITS 4-5 | KY114895 | 100 | 100 | 0 | CATTACACAATAAGAAGGCGGGCTGGATACCCCCAGCAGTGCGTTGCTTCGCGGCGTGCGCTGTTGGGCCGGCCTTGCTGAATTATTCACCCGTGTCTTTTGCGTACTTCTTGTTTCCTTGGTGGGCTCGCCCACCACAAGGACAACCCCATAAACCTTTTTGTAATAGCAATCAGCGTCAGTAACAATGTAATAATTACAACTTTCAACAACGGATCTCTTGGTTCTGGCATCGATGAAGAACGCAGCGAAATGCGATACGTAGTGTGAATTGCAGAATTCAGTGAATCATCGAATCTTTGAACGCACATTGCGCCCTTTGGTATTCCAAAGGGCATGCCTGTTCGAGCGTCATTTGTACCCTCAAGCTTTGCTTGGTGTTGGGCGTCTTGTCTCCAGTTCGCTGGAGACTCGCCTTAAAGTCATTGGCAGCCGGCCTACTGGTTTCGGAGCGCAGCACAAGTCGCGCTCTCTTCCAGCCAAGGTCAGCGTCCAGTAAGCCTTTTTTTCAACTTTTGACCT |
| MT802609 | 3135 | *Parengyodontium album* | (Limber) C.C. Tsang, J.F.W. Chan, W.M. Pong, J.H.K. Chen, A.H.Y. Ngan, M. Cheung, C.K.C. Lai, D.N.C. Tsang, S.K.P. Lau & P.C.Y. Woo 2016 | Yes. Successful. | ITS 4-5 | MK626713 | 100 | 100 | 0 | CATTACCGAGTTTACAACTCCCAAACCCATGTGAACATACCTTTACGTTGCTTCGGCGGAGCCGCCCCGGCGCCCGGAACCTCTTCGGTTTCGCGGCCCGGAACCAGGCGCCCGCCGGAGGCCACAAACTCTTTTGTTTTTACAGTTTCTTCTGAGTGTGCCGCAAGGCAAAATACAAATGAATCAAAACTTTCAACAACGGATCTCTTGGTTCTGGCATCGATGAAGAACGCAGCGAAATGCGATAAGTAATGTGAATTGCAGAATTCAGTGAATCATCGAATCTTTGAACGCACATTGCGCCCGCCAGAATTCTGGCGGGCATGCCTGTTCGAGCGTCATTTCAACCCTCGAGCTCCCCTCTTTTGGGAGAGCCCGGCGTTGGGGACCCGGCGCTAACACCGCCGGCCCCGAAATGGAGTGGCGGCCCGTCCGCGGCGACCTCTGCGTAGTAATATCCACTCGCACCGGGACCCGGGCGCGGCCACGCCGTTAAACACCCCACCTTCCGAATGTTGACCT |
| MT802599 | 3136 | *Paradendryphiella salina* | (G.K. Sutherl.) Woudenb. & Crous 2013 | Yes. Successful. | ITS 4-5 | MH857928 | 100 | 100 | 0 | ATTATTCACCCATGTCTTTTGCGCACTTCTTGTTTCCTGGGCGGGTTCGCCCGCCACCAGGACCCAACCATAAACCTTTTTTTGTAATTGCAATCAGCGTCAGTAAACAATGTAATTATTACAACTTTCAACAACGGATCTCTTGGTTCTGGCATCGATGAAGAACGCAGCGAAATGCGATACGTAGTGTGAATTGCAGAATTCAGTGAATCATCGAATCTTTGAACGCACATTGCGCCCTTTGGTATTCCAAAGGGCATGCCTGTTCGAGCGTCATTTGTACCCTCAAGCTTTGCTTGGTGTTGGGCGTCTTTGTCTCTCACGAGACTCGCCTTAAAATGATTGGCAGCCGGCCTACTGGTTTCGGAGCGCAGCACAATCTTGCACTTCTGATCAGCCATGGTTGAGCATCCATCAAGACCACATTTTTCTCACTTTTGACCT |
|  | 3137 |  |  | No. Sequencing failed. |  |  |  |  |  |  |
| MT802455 | 3138 | *Acremonium fuci* | Summerb., Zuccaro & W. Gams 2004 | Yes. Successful. | ITS 4-5 | MF186078 | 100 | 100 | 0 | CATTACTGAGTTTACAACTCCCAAACCCCTGTGAACATACCTATGTTGCTTCGGCGGGCCGTCCCGCGGCGCGCCCACGTGGCGTGACCCGGAACCAGGCGCCCGCCGGGGACCCAAACTCTTGCCTGTATAGTGTCTCCTCTGAGTGGCATAAGCAAAAATAAACAAAACTTTCAGCAACGGATCTCTTGGTTCTGGCATCGATGAAGAACGCAGCGAAATGCGATAAGTAATGTGAATTGCAGAATTCAGTGAATCATCGAATCTTTGAACGCACATTGCGCCCGCCAGTATTCTGGCGGGCATGCCTGTCTGAGCGTCATTTCAACCCTCAGCCCCCGCTCGCGGGGCGCTGGCGTTGGGGCTCGGCCGTCCACCGCGGCGGCCGGCCCCGAAACACAGTGGCGGTCTCCCGCGGACTCCCCTGCGTAGTAGCACTACCTCGCAGAAGGGACGAGCGGGCTGGCCACGCCGTAAAACCCCCCACTTCTCAAGGTTGACCT |
|  | 3139 |  |  | No. Sequencing failed. |  |  |  |  |  |  |
|  | 3140 |  |  | No. Sequencing failed. |  |  |  |  |  |  |
|  | 3141 |  |  | No. Sequencing failed. |  |  |  |  |  |  |
|  | 3142 |  |  | No. Sequencing failed. |  |  |  |  |  |  |
|  | 3143 | *Paralulworthia* sp. | Kohlm., Volkm.-Kohlm., J.Campb., Spatafora & Gräfenhan, 2005 | Yes. Successful. | ITS 4-5 | MZ357713 | 100 | 100 | 2.00E-180 | CATTACTGAGTTTACAAAAACTCCCAAACCCTTCTGTGAACCTCTTGAACGTTGCCTCGGCGGGCTCGCCCGCCGACGGCCCACCCAACAAACCATCACCAGACGTACCTCTGAGTGGACAACACAAATAAGTCAAAACTTTCAGCAACGGATCTCTTGGCTCTGGCATCGATGAAGAACGCAGCGAAATGCGATACGTAATGTGAATTGCAGAATTCAGCGAATCATCGAATCTTTGAACGCACATTGCGCCTGCCGGTATTCCGGCGGGCATGCCTGTCCGAGCGTCATTAAAAACCCCTCGGGCCCCACCTCTTGCGGGGTAGGCCCGGCGTTGGGGCGCCGGCGGACCT |
|  | 3144 |  |  | No. Sequencing failed. |  |  |  |  |  |  |
|  | 3145 |  |  | No. Sequencing failed. |  |  |  |  |  |  |
|  | 3146 |  |  | No. Sequencing failed. |  |  |  |  |  |  |
|  | 3147 |  |  | No. Sequencing failed. |  |  |  |  |  |  |
| MT802618 | 3235 | *Phaeosphaeria* sp. | I.Miyake, 1909 | Yes. Successful. | ITS 4-5 | MG813228 | 94.47 | 100 | 0 | CATTACAAGAAGTATAAGTAGTGTGCTTGCCTCATAGCAACCGCTACTTATTCTCCTATCTACCTTGATTTTTTGCGTACTCCTGTTTCCTTGGTAGGCTTGCCTGCCAGCTGGACAAATCTATAACCTTTTTAATATTCAATCAGCGTCTGAGAAAATTTAATAATTACAACTTTCAACAACGGATCTCTTGGTTCTGGCATCGATGAAGAACGCAGCGAAATGCGATAAGTAGTGTGAATTGCAGAATTCAGTGAATCATCGAATCTTTGAACGCACATTGCGCCCCTTGGTATTCCATGGGGCATGCCTGTTCGAGCGTCATTTGTAATCTCAAGCCTTGCTTGGTGTTGGGTATTTGTCTTAGTTAAGCTATAGACTTGCCTTAAATATATTGGCAGCCAGTATTTTGGTTTGATGATGCAGCACAGCGGATCAAGCTCTTGAATATTGGCGTCCATTAAGAATTTTAACTCTTTTGACCT |
| MT802627 | 3236 | *Sarocladium* sp. | W.Gams & D.Hawksw. | Yes. Successful. | ITS 4-5 | MH859780 | 95.25 | 100 | 0 | CATTACAAGAGAAGCTTCGGCTCTCCAACCCACTGTGAACATACCTACGTTCCCTCGGCGGGCTCAGCGCGCGGTGCCTCCGGGCGCCGGGCGTCCGCCGGGGGCCCCCAAACTCGAATTTACTACGTGTATCTCTGAGGGGCGAAAGCCTGAAAAAATGAATCAAAACTTTCAACAACGGATCTCTTGGCTCTGGCATCGATGAAGAACGCAGCGAAATGCGATAAGTAATGTGAATTGCAGAATTCAGTGAATCATCGAATCTTTGAACGCACATTGCGCCCGCCGGCACTCCGGCGGGCATGCCTGTCCGAGCGTCATTTCAACCCTCAGGCCCACCCTTCCGGGGGACGGGCCTGGTGTTGGGGCTCGGGGTCCGCAAGGCCCCCGTCCCCTAAATTCAGTGGCGGTCGCGCCGCAGCCTCCCCTGCGTAGTAGCACACCTCGCACCGGAGAGCGGCACGGCCACGCCGTGAAACCCCCAATTTTACCAAGGTTGACCT |
| MT802496 | 3237 | *Cadophora novi-eboraci* | Travadon, D.P. Lawr., Roon.-Lath., Gubler, W.F. Wilcox, Rolsh. & K. Baumgartner 2015 | Yes. Successful. | ITS 4-5 | KM497036 | 99.79 | 98 | 0 | CATTAATAAACCTCAGGCGCTTGCGCCCACAGGTAACCCTTGAATAAACTACCTTCGTTGCTTTGGCGGGCCGCCTCCCAGGCCAGCGGCTTCGGCTGCTGCGCGCCCGCCAGAGGACCACAACTCTTGTTTTTAGTGATGTCTGAGTACTATATAATAGTTAAAACTTTCAACAACGGATCTCTTGGTTCTGGCATCGATGAAGAACGCAGCGAAATGCGATAAGTAATGTGAATTGCAGAATTCAGTGAATCATCGAATCTTTGAACGCACATTGCGCCCTTTGGTATTCCGAAGGGCATGCCTGTTCGAGCGTCATTATAACCACTCAAGCCTTCGCTTGGTATTGGGGCTCGCGGTCGCGCGGCCCCTAAACTCAGTGGCGGTGCCGGCTGGCTCTACGCGTAGTAAAACTCCTCGCGTCTGGGTCCGGTCGGTTGCCTGCCAGCAACCCCCCATTTTTACAGGTTGACCT |
|  | 3238 | *Paraphaeosphaeria* sp. | O.E.Erikss., 1967 | Yes. Successful. | ITS 4-5 | JX496037 | 98.46 | 100 | 0 | TAGCCCAACGACTGTAAACAATTGGCGCCTCATGCAAGTCAGCTCCGGCTGGCGACACTTTCGAATTGCGGGGAACCCCTAAGAGCTCTTCACACCAAGCCAGCCCGGGAAACCGGCTGGTGGCCCATTGGAAACCATGGGGTACGGTAACAGCTGAAGAGATGACCCGGCCGCCTCGCAGCAGCCGGTGAAATGGGCGATCCGCAGCGAAGCCCCTTCCGTTGGTGGTAGCAGCTTCGGCCGCAGCCAAACGTGGGGAACGTTCACAGACTAAGTGGAAGTGGGTGGGGCCTAGCCCTGCTTAAGATATAGTCGGGCCCCCTGGGAAACTTGGGGGGGTGAGTTCGGCCTCCCGGCCGGCTCCAAGCAAACCGTTCCGTAGGTGAACCT |
| MT802567 | 3239 | *Leptospora* sp. | Rabenh. | Yes. Successful. | ITS 4-5 | HE774478 | 96.35 | 100 | 0 | CATTAAAAAATCAGTAGCTTGCTACTGTGCTGGGGGAGATGGGAAAGTCCTGGCTGAAAAGTCGGTGTACCGGTACCTGCACCCCTACGATACCCTTGTCTTTTGAGCACTTATGTTTCCTTGGTAGGCTTGCCTGCCAACAGGACAAACTTTAAACCTTTTTAAATATCAATCAGCGTCTGAATTATAATTAATAATTACAACTTTCAACAACGGATCTCTTGGTTCTGGCATCGATGAAGAACGCAGCGAAATGCGATAAGTAGTGTGAATTGCAGAATTCAGTGAATCATCGAATCTTTGAACGCACATTGCGCCCCTTGGTATTCCATGGGGCATGCCTGTTCGAGCGTCATTTGTACCCTCAAGCTATGCTTGGTGTTGGGTGATTGTCCAGCCGGTATGGCCAGGACTCGCCTTAAAGTAATTGGCAGCCAGTGTTTTGGTAGAAAGCGCAGCACATTTTGCGATTTACTCCAATAATATTAGCAACCATTAAGCTCATTTATCACTTTTGACCT |
| MT802456 | 3240 | *Acremonium fuci* | Summerb., Zuccaro & W. Gams 2004 | Yes. Successful. | ITS 4-5 | MF186078 | 100 | 100 | 0 | CATTACTGAGTTTACAACTCCCAAACCCCTGTGAACATACCTATGTTGCTTCGGCGGGCCGTCCCGCGGCGCGCCCACGTGGCGTGACCCGGAACCAGGCGCCCGCCGGGGACCCAAACTCTTGCCTGTATAGTGTCTCCTCTGAGTGGCATAAGCAAAAATAAACAAAACTTTCAGCAACGGATCTCTTGGTTCTGGCATCGATGAAGAACGCAGCGAAATGCGATAAGTAATGTGAATTGCAGAATTCAGTGAATCATCGAATCTTTGAACGCACATTGCGCCCGCCAGTATTCTGGCGGGCATGCCTGTCTGAGCGTCATTTCAACCCTCAGCCCCCGCTCGCGGGGCGCTGGCGTTGGGGCTCGGCCGTCCACCGCGGCGGCCGGCCCCGAAACACAGTGGCGGTCTCCCGCGGACTCCCCTGCGTAGTAGCACTACCTCGCAGAAGGGACGAGCGGGCTGGCCACGCCGTAAAACCCCCCACTTCTCAAGGTTGACCT |
| MT802477 | 3241 | *Alternaria phragmospora* | Emden 1970 | Yes. Successful. | ITS 4-5 | JQ796758 | 99 | 100 | 0 | cattacacaatatgaaggcgggctggatacccccagcagtgcgttgcttcgcggcgtgcgctgttgggccggccttgctgaattattcacccgtgtcttttgcgtacttcttgtttccttggtgggctcgcccaccataggacaaccccaataaacctttttgtaatagcaatcagcgtcagtaacaatgtaataattacaactttcaacaacggatctcttggttctggcatcgatgaagaacgcagcgaaatgcgatacgtagtgtgaattgcagaattcagtgaatcatcgaatctttgaacgcacattgcgccctttggtattccaaagggcatgcctgttcgagcgtcatttgtaccctcaagctttgcttggtgttgggcgtcttgtctccagttcgctggagactcgccttaaagtcattggcagccggcctactggtttcggagcgcagcacaagtcgcgctctcttccagccaaggtcagcgtccagtaagcctttatttcaacttttgacct |
| MT802631 | 3242 | *Sarocladium strictum* | (W. Gams) Summerb. 2011 | Yes. Successful. | ITS 4-5 | MK460826 | 99.8 | 100 | 0 | cattaccagagtgccctaggctctccacccattgtgaacttaccaaacgttccctcggcgggctcagcgcgcggtggcctccgggcctccgggcgtccgccggggaaaaccaaaccctgatttaatcgtatttctctgaggggcgaaagcccgaaaacaaaatgaatcaaaactttcaacaacggatctcttggctctggcatcgatgaagaacgcagcgaaatgcgataagtaatgtgaattgcagaattcagtgaatcatcgaatctttgaacgcacattgcgcccgccggcactccggcgggcatgcctgtccgagcgtcatttcaaccctcaggcccacccttccgggggagcgggcctggttctggggatcggcggccctcgcggcccccgtccctcaaattcagtggcggtcgcgccgcagcctcccctgcgtagtagcacaacctcgcaccggagagcggaacgaccacgccgtaaaacacccaattttttaaggttgacct |
| MT802492 | 3243 | *Cadophora luteo-olivacea* | (J.F.H. Beyma) T.C. Harr. & McNew 2003 | Yes. Successful. | ITS 4-5 | MH856091 | 99.82 | 100 | 0 | cattctagagcaaggacaggcagcgccccacagaagcttgcttcgtggcggggctaccctacttcggtagggtttagagccgtcgaccctctcggagaaggtcggtcctgaactccacccttgaataaactacctttgttgctttggcgggccgcctcgcgccagcggcttcggctgttgagtgcccgccagaggaccacaactcttgtttttagtgatgtctgagtactatataatagttaaaactttcaacaacggatctcttggttctggcatcgatgaagaacgcagcgaaatgcgataagtaatgtgaattgcagaattcagtgaatcatcgaatctttgaacgcacattgcgccctctggtattccggggggcatgcctgttcgagcgtcattataaccactcaagctctcgcttggtattggggttcgcggtttcgcggctcctaaaatcagtggcggtgcctgtcggctctacgcgtagtaatactcctcgcgtctgggtccggtaggtctacttgccagcaacccccaatttttacaggttgacct |
| MT802549 | 3247 | *Fusarium oxysporum* | Schltdl. 1824 | Yes. Successful. | ITS 4-5 | KX263816 | 99.79 | 100 | 0 | cattaccgagtttacaactccaaacccctgtgaacataccttatgttgcctcggcggatcagcccgcgccccgtaaaacgggacggcccgccgcaggaaccccaaaactctgtttttagtggaacttctgagtaaaaaaacaaataaatcaaaactttcaacaacggatctcttggttctggcatcgatgaagaacgcagcaaaatgcgataagtaatgtgaattgcagaattcagtgaatcatcgaatctttgaacgcacattgcgcccgccagtattctggcgggcatgcctgttcgagcgtcatttcaaccctcaaacccccgggtttggtgttggggatcgggcttttgcttcggcagcccggccccgaaatctagtggcggtctcgctgcagcctccattgcgtagtagctaacacctcgcaactggaacgcggcgcggccaagccgttaaacccccaacttctgaatgttgacct |
| MT802550 | 3248 | *Fusarium oxysporum* | Schltdl. 1824 | Yes. Successful. | ITS 4-5 | KX263816 | 99.79 | 100 | 0 | attaccgagtttacaactccaaacccctgtgaacataccttatgttgcctcggcggatcagcccgcgccccgtaaaacgggacggcccgccgcaggaaccccaaaactctgtttttagtggaacttctgagtaaaaaaacaaataaatcaaaactttcaacaacggatctcttggttctggcatcgatgaagaacgcagcaaaatgcgataagtaatgtgaattgcagaattcagtgaatcatcgaatctttgaacgcacattgcgcccgccagtattctggcgggcatgcctgttcgagcgtcatttcaaccctcaaacccccgggtttggtgttggggatcgggcttttgcttcggcagcccggccccgaaatctagtggcggtctcgctgcagcctccattgcgtagtagctaacacctcgcaactggaacgcggcgcggccaagccgttaaacccccaacttctgaatgttgacct |
| MT802540 | 3249 | *Fusarium avenaceum* | (Fr.) Sacc. 1886 | Yes. Successful. | ITS 4-5 | MK770801 | 100 | 100 | 0 | CATTACCGAGTTTACAACTCCCAAACCCCTGTGAACATACCTTAATGTTGCCTCGGCGGATCAGCCCGCGCCCCGTAAAACGGGACGGCCCGCCAGAGGACCCAAACTCTAATGTTTCTTATTGTAACTTCTGAGTAAAACAAACAAATAAATCAAAACTTTCAACAACGGATCTCTTGGTTCTGGCATCGATGAAGAACGCAGCAAAATGCGATAAGTAATGTGAATTGCAGAATTCAGTGAATCATCGAATCTTTGAACGCACATTGCGCCCGCTGGTATTCCGGCGGGCATGCCTGTTCGAGCGTCATTTCAACCCTCAAGCCCCCGGGTTTGGTGTTGGGGATCGGCTCTGCCTTCTGGCGGTGCCGCCCCCGAAATACATTGGCGGTCTCGCTGCAGCCTCCATTGCGTAGTAGCTAACACCTCGCAACTGGAACGCGGCGCGGCCATGCCGTAAAACCCCAACTTCTGAATGTTGAC |
| MT802547 | 3250 | *Fusarium lateritium* | Nees 1816 | Yes. Successful. | ITS 4-5 | MG066631 | 100 | 100 | 0 | CATTACCGAGTTTACAACTCCCAAACCCCTGTGAACATACCTTAATGTTGCCTCGGCGGATCAGCCCGCTCCCCGTAAAACGGGACGGCCCGCCAGAGGACCCAAACTCTAATGTTTCTTATTGTAACTTCTGAGTAAAACAAACAAATAAATCAAAACTTTCAACAACGGATCTCTTGGTTCTGGCATCGATGAAGAACGCAGCAAAATGCGATAAGTAATGTGAATTGCAGAATTCAGTGAATCATCGAATCTTTGAACGCACATTGCGCCCGCTGGTATTCCGGCGGGCATGCCTGTTCGAGCGTCATTTCAACCCTCAAGCCCCCGGGTTTGGTGTTGGGGATCGGCTCTGCCTCACGGCGGTGCCGCCCCCGAAATACATTGGCGGTCTCGCTGCAGCCTCCATTGCGTAGTAGCTAACACCTCGCAACTGGAACGCGGCGCGGCCATGCCGTAAAACCCCAACTTCTGAATGTTGACCT |
| MT802560 | 3254 | *Fusarium tricinctum* | (Corda) Sacc. 1886 | Yes. Successful. | ITS 4-5 | MK843921 | 100 | 100 | 0 | CATTACCGAGTTTACAACTCCCAAACCCCTGTGAACATACCTTAATGTTGCCTCGGCGGATCAGCCCGCGCCCCGTAAAACGGGACGGCCCGCCAGAGGACCCAAACTCTAATGTTTCTTATTGTAACTTCTGAGTAAAACAAACAAATAAATCAAAACTTTCAACAACGGATCTCTTGGTTCTGGCATCGATGAAGAACGCAGCAAAATGCGATAAGTAATGTGAATTGCAGAATTCAGTGAATCATCGAATCTTTGAACGCACATTGCGCCCGCTGGTATTCCGGCGGGCATGCCTGTTCGAGCGTCATTTCAACCCTCAAGCCCCCGGGTTTGGTGTTGGGGATCGGCTCTGCCCTTCTGGGCGGTGCCGCCCCCGAAATACATTGGCGGTCTCGCTGCAGCCTCCATTGCGTAGTAGCTAACACCTCGCAACTGGAACGCGGCGCGGCCATGCCGTAAAACCCCAACTTCTGAATGTTGACCT |
| MT802487 | 3255 | *Botrytis cinerea* | Pers. 1801 | Yes. Successful. | ITS 4-5 | MH346332 | 100 | 100 | 0 | CATTACAGAGTTCATGCCCGAAAGGGTAGACCTCCCACCCTTGTGTATTATTACTTTGTTGCTTTGGCGAGCTGCCTTCGGGCCTTGTATGCTCGCCAGAGAATACCAAAACTCTTTTTATTAATGTCGTCTGAGTACTATATAATAGTTAAAACTTTCAACAACGGATCTCTTGGTTCTGGCATCGATGAAGAACGCAGCGAAATGCGATAAGTAATGTGAATTGCAGAATTCAGTGAATCATCGAATCTTTGAACGCACATTGCGCCCCTTGGTATTCCGGGGGGCATGCCTGTTCGAGCGTCATTTCAACCCTCAAGCTTAGCTTGGTATTGAGTCTATGTCAGTAATGGCAGGCTCTAAAATCAGTGGCGGCGCCGCTGGGTCCTGAACGTAGTAATATCTCTCGTTACAGGTTCTCGGTGTGCTTCTGCCAAAACCCAAATTTTTCTATGGTTGACCT |
| MT802637 | 3256 | *Trichoderma samuelsii* | Jaklitsch & Voglmayr 2012 | Yes. Successful. | ITS 4-5 | MK862247 | 100 | 100 | 0 | CATTACCGAGTTTACAACTCCCAAACCCAATGTGAACCATACCAAACTGTTGCCTCGGCGGGGTCACGCCCCGGGTGCGTCGCAGCCCCGGAACCAGGCGCCCGCCGGAGGGACCAACCAAACTCTTTCTGTAGTCCCCTCGCGGACGTTATTTCTTACAGCTCTGAGCAAAAATTCAAAATGAATCAAAACTTTCAACAACGGATCTCTTGGTTCTGGCATCGATGAAGAACGCAGCGAAATGCGATAAGTAATGTGAATTGCAGAATTCAGTGAATCATCGAATCTTTGAACGCACATTGCGCCCGCCAGTATTCTGGCGGGCATGCCTGTCCGAGCGTCATTTCAACCCTCGAACCCCTCCGGGGGTCCGGCGTTGGGGATCGGGAACCCCTAAGACGGGATCCCGGCCCCGAAATACAGTGGCGGTCTCGCCGCAGCCTCTCATGCGCAGTAGTTTGCACAACTCGCACCGGGAGCGCGGCGCGTCCACGTCCGTAAAACACCCAACTTCTGAAATGTTGACCT |
| MT802635 | 3257 | *Tolypocladium inflatum* | W. Gams 1971 | Yes. Successful. | ITS 4-5 | MH301316 | 100 | 100 | 0 | CATTACCGAGTTATCAACTCCCAAACCCCTGTGAACATACCCAACGTTGCTTCGGCGGGACCGCCCCGGCGCCTCGGCGTCCCGGAACCAGGCGCCCGCCGGAGGACCCAAACTCTTGTTTAACCATAGTGGCATATTCTGAGTCTCACAAGAAAAATGAATCAAAACTTTCAACAACGGATCTCTTGGCTCTGGCATCGATGAAGAACGCAGCGAAATGCGATAAGTAATGTGAATTGCAGAATTCAGTGAATCATCGAATCTTTGAACGCACATTGCGCCCGCCAGTATTCTGGCGGGCATGCCTGTTCGAGCGTCATTTCAACCCTCAAGCCCCAGCGGCTTGGTGTTGGGGACCGGCCCCGGCCGCCCCCCAAATGCAGTGGCGACCT |
| MT802488 | 3258 | *Botrytis cinerea* | Pers. 1801 | Yes. Successful. | ITS 4-5 | MH346332 | 100 | 100 | 0 | CATTACAGAGTTCATGCCCGAAAGGGTAGACCTCCCACCCTTGTGTATTATTACTTTGTTGCTTTGGCGAGCTGCCTTCGGGCCTTGTATGCTCGCCAGAGAATACCAAAACTCTTTTTATTAATGTCGTCTGAGTACTATATAATAGTTAAAACTTTCAACAACGGATCTCTTGGTTCTGGCATCGATGAAGAACGCAGCGAAATGCGATAAGTAATGTGAATTGCAGAATTCAGTGAATCATCGAATCTTTGAACGCACATTGCGCCCCTTGGTATTCCGGGGGGCATGCCTGTTCGAGCGTCATTTCAACCCTCAAGCTTAGCTTGGTATTGAGTCTATGTCAGTAATGGCAGGCTCTAAAATCAGTGGCGGCGCCGCTGGGTCCTGAACGTAGTAATATCTCTCGTTACAGGTTCTCGGTGTGCTTCTGCCAAAACCCAAATTTTTCTATGGTTGACCT |
|  | 3259 | *Sarocladium strictum* | (W. Gams) Summerb. 2011 | No. ID based on morphology. |  |  |  |  |  |  |
| MT802620 | 3260 | *Septoriella vagans* | (Niessl) Y. Marín & Crous 2019 | Yes. Successful. | ITS 4-5 | KT896646 | 99.42 | 100 | 0 | CATTACATTCAGTAGCTTGCTACTGGTCGGGAGGCGCTGTAACTCCGCATAGTATGAATTTACTGATGAGCGGCAGGCCCTCTGTCTGTACCCTTGTCTTTTGCGCACTCATGTTTCCTCGGCGGGCTTGCCCGCCGATTGGACAAAACTATAACCTTTTTAATTTTCAATCAGCGTCTGAAAAAACTTAATAATTACAACTTTCAACAACGGATCTCTTGGTTCTGGCATCGATGAAGAACGCAGCGAAATGCGATAAGTAGTGTGAATTGCAGAATTCAGTGAATCATCGAATCTTTGAACGCACATTGCGCCCCTTGGTATTCCATGGGGCATGCCTGTTCGAGCGTCATTTGTACCCTCAAGCTCTGCTTGGTGTTGGGTGTTTGTCCTCTCCTTTGCGTTTGGACTCGCCTTAAAGCAATTGGCAGCCAGTGTTTTGGTATTGAAGCGCAGCACATTTTGCGATTCTTGCTGATAATACTTGCGTCCATAAGCCTTTTTTAACTTTTGACCT |
| MT802632 | 3261 | *Septoriella poae* | (Crous & Quaedvl.) Hern.-Restr., J.Z. Groenew. & Crous 2015 | Yes. Successful. | ITS 4-5 | NR_155793 | 99.61 | 98 | 0 | CATTACATTCAGTAGCTTGCTACTGGTCGGGAGGCGCCGTAACTCCGCATAGTATTAGTTTACTGATGAGCGGCAGGCCCTCTGTCTGTACCCTTGTCTTTTGCGCACTCTGGTTTCCTCGGCGGGCTTGCCCGCCGATTGGACAAAACTATAGCCTTTTTAATTTTCAATCAGCGTCTGAAACAATGAAATAATTACAACTTTCAACAACGGATCTCTTGGTTCTGGCATCGATGAAGAACGCAGCGAAATGCGATAAGTAGTGTGAATTGCAGAATTCAGTGAATCATCGAATCTTTGAACGCACATTGCGCCCCTTGGTATTCCATGGGGCATGCCTGTTCGAGCGTCATTTGTACCCTCAAGCTCTGCTTGGTGTTGGGTGTTTGTCCACTCCCTGCGTTTGGACTCGCCTTAAAGCAATTGGCAGCCAGTGTTTTGGTATTGAAGCGCAGCACATTTTGCGATTCTAGCCGATAATACTTGCGTCCATAAGCCTTTTTACACTTTTGACCT |
|  | 3262 |  |  | No. Sequencing failed. |  |  |  |  |  |  |
| MT802561 | 3263 | *Ilyonectria robusta* | (A.A. Hildebr.) A. Cabral & Crous 2012 | Yes. Successful. | ITS 4-5 | MH865181 | 100 | 100 | 0 | CATTACCGAGTTTACAACTCCCAAACCCCTGTGAACATACCATATTGTTGCCTCGGCGGTGCCTGTTTCGGCAGCCCGCCAGAGGACCCAAACCCTAGATTACATTAAAGCATTTTCTGAGTCAATGATTAAATCAATCAAAACTTTCAACAACGGATCTCTTGGTTCTGGCATCGATGAAGAACGCAGCGAAATGCGATAAGTAATGTGAATTGCAGAATTCAGTGAATCATCGAATCTTTGAACGCACATTGCGCCCGCCAGTATTCTGGCGGGCATGCCTGTCCGAGCGTCATTTCAACCCTCAAGCCCCCGGGCTTGGTGTTGGAGATCGGCGAGCCCCCCGGGGCGCGCCGTCTCCCAAATATAGTGGCGGTCCCGCTGTAGCTTCCTCTGCGTAGTAGCACACCTCGCACTGGGAAACAGCGTGGCCACGCCGTAAAACCCCCCACTTCTGAAAGGTTGACCT |
|  | 3264 |  |  | No. Sequencing failed. |  |  |  |  |  |  |
| MT802462 | 3265 | *Alternaria alternata* | (Fr.) Keissl. 1912 | Yes. Successful. | ITS 4-5 | MK881030 | 100 | 100 | 0 | CATTACACAAATATGAAGGCGGGCTGGAACCTCTCGGGGTTACAGCCTTGCTGAATTATTCACCCTTGTCTTTTGCGTACTTCTTGTTTCCTTGGTGGGTTCGCCCACCACTAGGACAAACATAAACCTTTTGTAATTGCAATCAGCGTCAGTAACAAATTAATAATTACAACTTTCAACAACGGATCTCTTGGTTCTGGCATCGATGAAGAACGCAGCGAAATGCGATAAGTAGTGTGAATTGCAGAATTCAGTGAATCATCGAATCTTTGAACGCACATTGCGCCCTTTGGTATTCCAAAGGGCATGCCTGTTCGAGCGTCATTTGTACCCTCAAGCTTTGCTTGGTGTTGGGCGTCTTGTCTCTAGCTTTGCTGGAGACTCGCCTTAAAGTAATTGGCAGCCGGCCTACTGGTTTCGGAGCGCAGCACAAGTCGCACTCTCTATCAGCAAAGGTCTAGCATCCATTAAGCCTTTTTTTCAACTTTTGACCT |
| MT802485 | 3266 | *Boeremia exigua* | (Desm.) Aveskamp, Gruyter & Verkley 2010 | Yes. Successful. | ITS 4-5 | MK100216 | 100 | 100 | 0 | CATTACCTAGAGTTGTAGGCTTTGCCTACCATCTCTTACCCATGTCTTTTGAGTACCTTCGTTTCCTCGGCGGGTCCGCCCGCCGATTGGACAAACTTAAACCCTTTGTAATTGAAATCAGCGTCTGAAAAAACATAATAGTTACAACTTTCAACAACGGATCTCTTGGTTCTGGCATCGATGAAGAACGCAGCGAAATGCGATAAGTAGTGTGAATTGCAGAATTCAGTGAATCATCGAATCTTTGAACGCACATTGCGCCCCTTGGTATTCCATGGGGCATGCCTGTTCGAGCGTCATTTGTACCTTCAAGCTCTGCTTGGTGTTGGGTGTTTGTCTCGCCTTTGCGTGTAGACTCGCCTTAAAACAATTGGCAGCCGGCGTATTGATTTCGGAGCGCAGTACATCTCGCGCTTTGCACTCATAACGACGACGTCCAAAAAGTACTTTTTACACTCTTGACCT |
| MT802600 | 3267 | *Paradendryphiella salina* | (G.K. Sutherl.) Woudenb. & Crous 2013 | Yes. Successful. | ITS 4-5 | MH857928 | 100 | 100 | 0 | ATTATTCACCCATGTCTTTTGCGCACTTCTTGTTTCCTGGGCGGGTTCGCCCGCCACCAGGACCCAACCATAAACCTTTTTTTGTAATTGCAATCAGCGTCAGTAAACAATGTAATTATTACAACTTTCAACAACGGATCTCTTGGTTCTGGCATCGATGAAGAACGCAGCGAAATGCGATACGTAGTGTGAATTGCAGAATTCAGTGAATCATCGAATCTTTGAACGCACATTGCGCCCTTTGGTATTCCAAAGGGCATGCCTGTTCGAGCGTCATTTGTACCCTCAAGCTTTGCTTGGTGTTGGGCGTCTTTGTCTCTCACGAGACTCGCCTTAAAATGATTGGCAGCCGGCCTACTGGTTTCGGAGCGCAGCACAATCTTGCACTTCTGATCAGCCATGGTTGAGCATCCATCAAGACCACATTTTTCTCACTTTTGACCT |
| MT802457 | 3268 | *Acremonium fuci* | Summerb., Zuccaro & W. Gams 2004 | Yes. Successful. | ITS 4-5 | MF186078 | 100 | 100 | 0 | CATTACTGAGTTTACAACTCCCAAACCCCTGTGAACATACCTATGTTGCTTCGGCGGGCCGTCCCGCGGCGCGCCCACGTGGCGTGACCCGGAACCAGGCGCCCGCCGGGGACCCAAACTCTTGCCTGTATAGTGTCTCCTCTGAGTGGCATAAGCAAAAATAAACAAAACTTTCAGCAACGGATCTCTTGGTTCTGGCATCGATGAAGAACGCAGCGAAATGCGATAAGTAATGTGAATTGCAGAATTCAGTGAATCATCGAATCTTTGAACGCACATTGCGCCCGCCAGTATTCTGGCGGGCATGCCTGTCTGAGCGTCATTTCAACCCTCAGCCCCCGCTCGCGGGGCGCTGGCGTTGGGGCTCGGCCGTCCACCGCGGCGGCCGGCCCCGAAACACAGTGGCGGTCTCCCGCGGACTCCCCTGCGTAGTAGCACTACCTCGCAGAAGGGACGAGCGGGCTGGCCACGCCGTAAAACCCCCCACTTCTCAAGGTTGACCT |
| MT802579 | 3269 | *Neonectria lugdunensis* | (Sacc. & Therry) L. Lombard & Crous 2014 | Yes. Successful. | ITS 4-5 | MH863594 | 100 | 100 | 0 | CATTACCGAGTTTACAACTCCCAAACCCCTGTGAACATACCTATCGTTGCCTCGGCGGTGCCCGCTCCGGCGGCCCGCCAGAGGACCCCAAACTCTTGTTTTATACAGTATCTTCTGAGTAACACGATTAAATAAATCAAAACTTTCAACAACGGATCTCTTGGTTCTGGCATCGATGAAGAACGCAGCGAAATGCGATAAGTAATGTGAATTGCAGAATTCAGTGAATCATCGAATCTTTGAACGCACATTGCGCCCGCCAGTATTCTGGCGGGCATGCCTGTTCGAGCGTCATTTCAACCCTCAAGCCCCCGGGCTTGGTGTTGGGGATCGGCGTGCCCTCGCGGCGCGCCGTCCCCGAAATCTAGTGGCGGTCTCGCTGTAGCTTCCTCTGCGTAGTAGCACACCTCGCACTGGAAAGCAGCGCGGCCACGCCGTTAAACCCCCCACTTCTGAAAGGTTGACCT |
| MT802601 | 3270 | *Paradendryphiella salina* | (G.K. Sutherl.) Woudenb. & Crous 2013 | Yes. Successful. | ITS 4-5 | MH857928 | 100 | 100 | 0 | ATTATTCACCCATGTCTTTTGCGCACTTCTTGTTTCCTGGGCGGGTTCGCCCGCCACCAGGACCCAACCATAAACCTTTTTTTGTAATTGCAATCAGCGTCAGTAAACAATGTAATTATTACAACTTTCAACAACGGATCTCTTGGTTCTGGCATCGATGAAGAACGCAGCGAAATGCGATACGTAGTGTGAATTGCAGAATTCAGTGAATCATCGAATCTTTGAACGCACATTGCGCCCTTTGGTATTCCAAAGGGCATGCCTGTTCGAGCGTCATTTGTACCCTCAAGCTTTGCTTGGTGTTGGGCGTCTTTGTCTCTCACGAGACTCGCCTTAAAATGATTGGCAGCCGGCCTACTGGTTTCGGAGCGCAGCACAATCTTGCACTTCTGATCAGCCATGGTTGAGCATCCATCAAGACCACATTTTTCTCACTTTTGACCT |
| MT802470 | 3271 | *Alternaria chlamydospora* | Mouch. 1973 | Yes. Successful. | ITS 4-5 | MH860542 | 100 | 100 | 0 | CATTACACAATAAGAAGGCGGGCTGGATACCCCCAGCAGTGCGTTGCTTCGCGGCGTGCGCTGTTGGGCCGGCCTTGCTGAATTATTCACCCGTGTCTTTTGCGTACTTCTTGTTTCCTTGGTGGGCTCGCCCACCACAAGGACAACCCCATAAACCTTTTTGTAATAGCAATCAGCGTCAGTAACAATGTAATAATTACAACTTTCAACAACGGATCTCTTGGTTCTGGCATCGATGAAGAACGCAGCGAAATGCGATACGTAGTGTGAATTGCAGAATTCAGTGAATCATCGAATCTTTGAACGCACATTGCGCCCTTTGGTATTCCAAAGGGCATGCCTGTTCGAGCGTCATTTGTACCCTCAAGCTTTGCTTGGTGTTGGGCGTCTTGTCTCCAGTTCGCTGGAGACTCGCCTTAAAGTCATTGGCAGCCGGCCTACTGGTTTCGGAGCGCAGCACAAGTCGCGCTCTCATCCAGCCAAGGTCAGCGTCCAGTAAGCCTTTTTTTCAACTTTTGACCT |
| MT802471 | 3272 | *Alternaria chlamydospora* | Mouch. 1973 | Yes. Successful. | ITS 4-5 | MH860542 | 100 | 100 | 0 | CATTACACAATAAGAAGGCGGGCTGGATACCCCCAGCAGTGCGTTGCTTCGCGGCGTGCGCTGTTGGGCCGGCCTTGCTGAATTATTCACCCGTGTCTTTTGCGTACTTCTTGTTTCCTTGGTGGGCTCGCCCACCACAAGGACAACCCCATAAACCTTTTTGTAATAGCAATCAGCGTCAGTAACAATGTAATAATTACAACTTTCAACAACGGATCTCTTGGTTCTGGCATCGATGAAGAACGCAGCGAAATGCGATACGTAGTGTGAATTGCAGAATTCAGTGAATCATCGAATCTTTGAACGCACATTGCGCCCTTTGGTATTCCAAAGGGCATGCCTGTTCGAGCGTCATTTGTACCCTCAAGCTTTGCTTGGTGTTGGGCGTCTTGTCTCCAGTTCGCTGGAGACTCGCCTTAAAGTCATTGGCAGCCGGCCTACTGGTTTCGGAGCGCAGCACAAGTCGCGCTCTCATCCAGCCAAGGTCAGCGTCCAGTAAGCCTTTTTTTCAACTTTTGACCT |
|  | 3273 |  |  | No. Sequencing failed. |  |  |  |  |  |  |
| MT802472 | 3274 | *Alternaria chlamydospora* | Mouch. 1973 | Yes. Successful. | ITS 4-5 | MH860542 | 100 | 100 | 0 | CATTACACAATAAGAAGGCGGGCTGGATACCCCCAGCAGTGCGTTGCTTCGCGGCGTGCGCTGTTGGGCCGGCCTTGCTGAATTATTCACCCGTGTCTTTTGCGTACTTCTTGTTTCCTTGGTGGGCTCGCCCACCACAAGGACAACCCCATAAACCTTTTTGTAATAGCAATCAGCGTCAGTAACAATGTAATAATTACAACTTTCAACAACGGATCTCTTGGTTCTGGCATCGATGAAGAACGCAGCGAAATGCGATACGTAGTGTGAATTGCAGAATTCAGTGAATCATCGAATCTTTGAACGCACATTGCGCCCTTTGGTATTCCAAAGGGCATGCCTGTTCGAGCGTCATTTGTACCCTCAAGCTTTGCTTGGTGTTGGGCGTCTTGTCTCCAGTTCGCTGGAGACTCGCCTTAAAGTCATTGGCAGCCGGCCTACTGGTTTCGGAGCGCAGCACAAGTCGCGCTCTCATCCAGCCAAGGTCAGCGTCCAGTAAGCCTTTTTTTCAACTTTTGACCT |
| MT802607 | 3431 | *Parastagonospora* sp. | Quaedvlieg, Verkley & Crous | Yes. Successful. | ITS 4-5 | NR_156608 | 95.67 | 100 | 0 | cattacattcagtagcctagctacttgtttacacccttgttttttgcgtacctattgtttcctcggcgagcttgctcgccggttggacaaaacttataaccttttttaaatcttcaatcagcgtctgaattatacataataattacaactttcaacaacggatctcttggttctggcatcgatgaagaacgcagcgaaatgcgataagtagtgtgaattgcagaattcagtgaatcatcgaatctttgaacgcacattgcgccccttggtattccatggggcatgcctgttcgagcgtcatttgtaccctcaagctttgcttggtgttgggcgttttgtcttttactagactcgccttaaagtcattggcagccagtgtttttggtagtaagcgcagcacattttgcgtcttagtccttgaatcgtggcatccatgaagcctctttttcacttttgacct |
| MT802526 | 3433 | *Epicoccum layuense* | Qian Chen, Crous & L. Cai 2017 | Yes. Successful. | ITS 4-5 | MH643925 | 100 | 100 | 0 | CATTACCTAGAGTTTGTAGACTTCGGTCTGCTACCTCTTACCCATGTCTTTTGAGTACCTTCGTTTCCTCGGCGGGTCCGCCCGCCGATTGGACAACATTCAAACCCTTTGCAGTTGCAATCAGCGTCTGAAAAAACATAATAGTTACAACTTTCAACAACGGATCTCTTGGTTCTGGCATCGATGAAGAACGCAGCGAAATGCGATAAGTAGTGTGAATTGCAGAATTCAGTGAATCATCGAATCTTTGAACGCACATTGCGCCCCTTGGTATTCCATGGGGCATGCCTGTTCGAGCGTCATTTGTACCTTCAAGCTCTGCTTGGTGTTGGGTGTTTGTCTCGCCTCTGCGTGTAGACTCGCCTTAAAACAATTGGCAGCCGGCGTATTGATTTCGGAGCGCAGTACATCTCGCGCTTTGCACTCATAACGACGACGTCCAAAAGTACATTTTTACACTCTTGACCT |
|  | 3434 |  |  | No. Triplicate PCR failed. |  |  |  |  |  |  |
| MT802493 | 3435 | *Cadophora luteo-olivacea* | (J.F.H. Beyma) T.C. Harr. & McNew 2003 | Yes. Successful. | ITS 4-5 | KU214556 | 99.1 | 100 | 0 | CATTACTAGAGCAAAGGACAGGCAGCACCCCACAGAAGCTTGCTTCGTGGCGGGCTACCCTACTTCGGTAGGGTTTAGAGCCGTCGACCCTCTCGCAGAAGGTCGGTCCTGAACTCCACCCTTGAATAAATTACCTTTGTTGCTTTGGCGGGCCGCCTCGCGCCAGCGGCTTCGGCTGTTGAGTGCCCGCCAGAGGACCCCAACTCTTGTTTTTAGTGATGTCTGAGTACTATATAATAGTTAAAACTTTCAACAACGGATCTCTTGGTTCTGGCATCGATGAAGAACGCAGCGAAATGCGATAAGTAATGTGAATTGCAGAATTCAGTGAATCATCGAATCTTTGAACGCACATTGCGCCCTCTGGTATTCCGGGGGGCATGCCTGTTCGAGCGTCATTATAACCACTCAAGCTCTCGCTTGGTATTGGGGTTCGCGGTTTCGCGGCCCCTAAAACCAGTGGCGGTGCCTGTCGGCTCTACGCGTAGTAATACTCCTCGCGTCTGGGTCCGGTAGGTCTACTTGCCAGCAACCCCCAATTTTTACAGGTTGACCT |
|  | 3436 |  |  | No. Triplicate PCR failed. |  |  |  |  |  |  |
|  | 3438 |  |  | No. Sequencing failed. |  |  |  |  |  |  |
| MT802464 | 3439 | *Alternaria arborescens* | E.G. Simmons 1999 | Yes. Successful. | ITS 4-5 | MK460794.1 | 100 | 100 | 0 | cattacacaaatatgaaggcgggctggaacctctcggggttacagccttgctgaattattcacccttgtcttttgcgtacttcttgtttccttggtgggttcgcccaccactaggacaaacataaaccttttgtaattgcaatcagcgtcagtaacaaattaataattacaactttcaacaacggatctcttggttctggcatcgatgaagaacgcagcgaaatgcgataagtagtgtgaattgcagaattcagtgaatcatcgaatctttgaacgcacattgcgccctttggtattccaaagggcatgcctgttcgagcgtcatttgtaccctcaagctttgcttggtgttgggcgtcttgtctctagctttgctggagactcgccttaaagtaattggcagccggcctactggtttcggagcgcagcacaagtcgcactctctatcagcaaaggtctagcatccattaagccttttttcaacttttgacct |
|  | 3440 |  |  | No. Triplicate PCR failed. |  |  |  |  |  |  |
|  | 3441 |  |  | No. Triplicate PCR failed. |  |  |  |  |  |  |
|  | 3442 |  |  | No. Triplicate PCR failed. |  |  |  |  |  |  |
| MT802610 | 3485 | *Penicillium brevicompactum* | Dierckx 1901 | Yes. Successful. | ITS 4-5 | MK268053 | 98.82 | 100 | 0 | CATTACCGAGTGAGGGCCCTCTGGGTCCAACCTCCCACCCGTGATTTATTTTACCTTGCTTGCTTCGGCGAGCCTGCCTTTTGGCTGCCGGGGGACGTCTGTCCCCGGGTCCGCGCTCGCCGAAGACACCTTAGAACTCTGTCTGAAGATTGTAGTCTGAGATTAAATATAAATTATTTAAAACTTTCAACAACGGATCTCTTGGTTCCGGCATCGATGAAGAACGCAGCGAAATGCGATACGTAATGTGAATTGCAGAATTCAGTGAATCATCGAGTCTTTGAACGCACATTGCNCCCTCTGGTATTCCNGAGGGCATGCCTGTCCGAGCGTCATTGCTGCCCTCAAGCACGGCTTGTGTGTTGGGCTCCGTCCTCCTTCCGGGGGACGGGCCCGAAAGGCAGCGGCGGCACCGCGTCCGGTCCTCAAGCGTATGGGGCTTTGTCACCCGCTTTGTAGGACTGGCCGGGCGCCTGACGATCAACCAAACTTTTTTCCAGGTTGACCT |
| MT802515 | 3559 | *Cylindrobasidium laeve* | (Pers.) Chamuris 1984 | Yes. Successful. | ITS 4-5 | KJ652553 | 99.72 | 100 | 0 | CATTAATGAAATAATACTTTGCAGCTTCAAGTTGTTGCTGGTCTTTAACGAGACATGTGCACACTTGTTGTTGTGAATATTCATCCACCTGTGCACTTCTGTAAGTCTGGAAAACTATCATAAAGTTTACTTTGTGGTTTGAAAGGTTGCTTTTTTAAAGCTCCTTTTGACTTTCCAGGCTTATGAATTCATATACTCTTTGTATGTCTTGAATGTCTTGTTTACTGGACTTATGTCCTCTAAAACTATATACAACTTTCAACAACGGATCTCTTGGCTCTCGCATCGATGAAGAACGCAGCGAAATGCGATAACTAATGTGAATTGCAGAATTCAGTGAATCATCGAGTCTTTGAACGCACCTTGCGCCCTCTGGTATTCCGGAGGGCATGCCTGTTTGAGTGTCAGTGAAATCTCAACCTCTCATGCTTTGTTGGCATTGAGAGGATTGGATATGGAGGCTTGCTGGATTTTATTCAGCTCCTCTGAAATGTATTAGCAGGAACCATTGCTAAGGTTTACTGCAGCCGTGTGATAATTATCTTGCGGTTGAAGTAAACAATTAGTTTGTCTCACTTTTGGTCTGAAGAAATGCTCATTGAGCTTTCTTTGCTTTCTCTCTTCGGAGTGATACCTATCCAAGTGCAGATTTTAATGGTCTTATCCAGCTTCTAACCATCTGGAAACAGATAACACTTGACCATTTGACCT |
| MT802483 | 3560 | *Apiospora sphaerosperma* | (Pers.) Pintos & P. Alvarado 2021 | Yes. Successful. | ITS 4-5 | MF186095 | 100 | 100 | 0 | CATTACAGAGTTATACAACTCCCATACCATTTGTAAACTTTACTCAGTTATGCCTCGGCGTGAACTGCGTACGGAGTGTAGAGTGGTGTTACCCGGTAGCTTACCCTGTAGGTTACCCTGTAGCGCTACCCTGCATCGCTCCCGCGCAGCCCGCCGGTGGTACACTAAACTCTTGTTTTATTTTATATTCTGAGCGTATTATTTTAATAATTAAAACTTTCAACAACGGATCTCTTGGTTCTGGCATCGATGAAGAACGCAGCGAAATGCGATAAGTAATGTGAATTGCAGAATTCAGTGAATCATCGAATCTTTGAACGCACATTGCGCCCATCAGTATTCTGGTGGGCATGCCTGTTCGAGCGTCATTTCAACCCTTAAGCCTAGCTTAGTGTTGGGAATCTACTGTATTGTAGTTCCTTAAAGACAGTGGCGGAGCGATAGTTGTCCTCTGAGCGTAGTAAATTTATTTCTCGCTTCTGTAAGGCTCTATTCTCCCGCCATAAAACCCCCAATTTTTTAGTGGTTGACCT |
|  | 3561 |  |  | No. Triplicate PCR failed. |  |  |  |  |  |  |
|  | 3562 |  |  | No. Triplicate PCR failed. |  |  |  |  |  |  |
| MT802507 | 3563 | *Cladosporium herbarum* | (Pers.) Link 1816 | Yes. Successful. | ITS 4-5 | MH864758 | 100 | 100 | 0 | cattacagaacgcccgggcttcggcctggttattcataaccctttgttgtccgactctgttgcctccggggcgaccctgccttcgggcgggggctccgggtggacacttcaaactcttgcgtaactttgcagtctgagtaaacttaattaataaattaaaacttttaacaacggatctcttggttctggcatcgatgaagaacgcagcgaaatgcgataagtaatgtgaattgcagaattcagtgaatcatcgaatctttgaacgcacattgcgccccctggtattccggggggcatgcctgttcgagcgtcatttcaccactcaagcctcgcttggtattgggcaacgcggtccgccgcgtgcctcaaatcgtccggctgggtcttctgtcccctaagcgttgtggaaactattcgctaaagggtgttcgggaggctacgccgtaaaacaaccccatttctaaggttgacct |
