# Supplementary material for: Diversity of fungi from marine inundated wood from the Bay of Fundy, Nova Scotia, Canada
Source: publisher site journal article supplement (doi:10.1515/bot-2023-0005), 2023-07-12
Supplement: Supplementary file 2 [file j_bot-2023-0005_suppl_004.docx]

Diversity of fungi from marine inundated wood from the Bay of Fundy, Nova Scotia, Canada

Sarah J. Adams and Allison K. Walker

DOI 10.1515/bot-2023-0005

Supplementary Table S4: Fungi isolated from marine wood during our study by substrate type and location, and previous records.

Fungi isolated from marine inundated wood from the Bay of Fundy coastline of Nova Scotia during our study are compared to previous records of the same species from this region. Previous records are indicated by an *. Bolded substrates and locations are from our study. Region codes: CB - Chignecto Bay; MB - Minas Basin; BoF – Outer Bay of Fundy.

| **Fungus** | **Previous record** | **Substrate** | **Collection location** |
| --- | --- | --- | --- |
| *Acremonium fuci* Summerb., Zuccaro & W. Gams 2004 | * | Seawater. **Driftwood**, **Intertidal Attached** and **Loose Wood** | Kingsport, NS. **CB: Minudie, Lower Cove, MacCarron's Brook, East Shulie, Shulie Wharf, Edgett's Beach, Spicer's Cove and Eatonville Harbour. MB: Scots Bay.**  **BoF: East Ferry.** |
| *A. rutilum* W. Gams 1971 |  | **Intertidal Attached Wood**. | **CB: Minudie, Lower Cove.** |
| *Akanthomyces muscarius*  (Petch) Spatafora, Kepler & B. Shrestha 2017 |  | **Intertidal Attached Wood**. | **CB: Lower Cove.** |
| *Alternaria alternata (*Fr.) Keissl. 1912 | * | Marine inundated wood, *Spartina*, Seawater and Sea foam. **Driftwood** and  **Intertidal Attached**. | **BoF: Isle Haute, Culloden** |
| *A. arborescens* E.G. Simmons 1999 |  | **Intertidal Loose Wood**. | **MB: Houston's Beach** |
| *A. chlamydospora* Mouch. 1973 | * | Driftwood. **Intertidal Attached Wood**. | Cymbria, PEI. **MB: Scots Bay, BoF: Israel's Cove.** |

| **Fungus** | **Previous Record** | **Substrate** | **Collection Location** |
| --- | --- | --- | --- |
| *A. chlamydosporigena*  Woudenb. & Crous 2013 | * | Marine wood. **Intertidal Attached Wood**. | Edgett's Beach, NS **MB: Scots Bay.** |
| *A. obclavata* (Crous & U.  Braun) Woudenb. & Crous 2013 |  | **Intertidal Attached Wood**. | **MB: Scots Bay.** |
| *A. phragmospora* Emden 1970 |  | **Driftwood** and **Intertidal Attached Wood**. | **CB: Eatonville Harbour. MB: Scots Bay.** |
| *Amylocarpus encephaloides* Curr. 1859 | * | Wood Bait, Seaweed.  **Intertidal Attached Wood**. | **MB: Spencer's Island Beach.** |
| *Apiospora sphaerosperma* (Pers.) Pintos & P. Alvarado |  | **Driftwood**. | **BoF: Isle Haute.** |
| *Boeremia exigua* (Desm.)  Aveskamp, Gruyter & Verkley 2010 | * | Seawater. **Intertidal Attached Wood**. | **BoF: Sandy Cove.** |
| *Botrytis cinerea* Pers. 1797 | * | *Spartina*, Seawater, Seaweed. **Driftwood**. | Bon Portage, Kingsport, NS.  **BoF: Isle Haute.** |
| *Cadophora luteo-olivacea* (J.F.H. Beyma) T.C. Harr. & McNew 2003 | * | Sea foam, Driftwood. **Intertidal Loose Wood** and **Driftwood**. | PEI, Bon Portage, NS. **CB: Minudie. MB: Bass River, Anthony Provincial Park,**  **Hall's Harbour.** |
| *C. malorum* (Kidd & Beaumont) W. Gams 2000 | * | Sea foam, Driftwood.  **Intertidal Attached Wood**. | PEI, Bon portage, NS. **BoF: Port Lorne.** |
| *C. novi-eboraci* Travadon,  D.P. Lawr., Roon.-Lath., Gubler, W.F. Wilcox, Rolsh. & K. Baumgartner  2015 |  | **Intertidal Attached Wood**. | **CB: Minudie.** |

| **Fungus** | **Previous Record** | **Substrate** | **Collection Location** |
| --- | --- | --- | --- |
| *Chalastospora cetera* (E.G. Simmons) E.G. Simmons 2007 | * | Seawater. **Driftwood** and  **Intertidal Attached Wood**. | Kingsport, NS. **CB: Sand River. MB: Scots Bay.** |
| *Cladosporium allicinum* (Fr.) Bensch, U. Braun & Crous 2012 | * | Seawater. **Intertidal Loose Wood**. | Kingsport, NS. **MB: Houston's Beach.** |
| *C. cladosporioides* (Fresen.) G.A. de Vries 1952 | * | Seawater, Marine Wood, *Spartina*, Marine Sediments. **Intertidal Loose** and  **Attached Wood**. | Kingsport, Bon Portage, and Edgett's Beach, NS. **MB: Hall's Harbour. BoF: Culloden.** |
| *C. herbarum* (Pers.) Link 1816 | * | *Spartina*, Seawater, Seaweed, Marine Wood, Driftwood. **Intertidal Loose** and **Attached Wood**,  **Driftwood**. | Kingsport, Bon Portage, and Edgett's Beach. **MB: Ottawa House, Bass River, Scots Bay. BoF: Isle Haute, Port Lorne.** |
| *C. ramotenellum* K. Schub., Zalar, Crous & U. Braun 2007 | * | Sea Air and Seawater.  **Driftwood**. | Bon Portage and Kingsport, NS. **MB: West Bay.** |
| *Cordyceps farinosa*  (Holmsk.) Kepler, B. Shrestha & Spatafora 2017 |  | **Intertidal Loose Wood.** | **MB: Bass River.** |
| *Corollospora maritima*  Werderm. 1922 | * | **Intertidal Attached Wood**. | **CB: Edgett's Beach.** |
| *Corollospora* sp. | * | **Intertidal Loose Wood** | **MB: Bass River.** |
| *Cylindrobasidium laeve*  (Pers.) Chamuris 1984 |  | **Driftwood**. | **BoF: Isle Haute.** |
| *Cylindrocarpon*  *cylindroides* Wollenw. 1913 |  | **Intertidal Loose Wood**. | **CB: East Shulie.** |

| **Fungus** | **Previous Record** | **Substrate** | **Collection Location** |
| --- | --- | --- | --- |
| *Cystofilobasidium* sp. |  | **Intertidal Attached Wood**. | **CB: Edgett's Beach.** |
| *Diatrypella favacea* (Fr.) Ces. & De Not. 1863 |  | **Driftwood**. | **MB: West Bay.** |
| *Didymella segeticola*  (Qian Chen) Qian Chen, Crous & L. Cai 2017 |  | **Intertidal Attached Wood**. | **CB: Lower Cove.** |
| *Epicoccum layuense* Qian Chen, Crous & L. Cai 2017 | * | Sea Air, Seawater and Driftwood. **Intertidal Attached Wood** and  **Driftwood**. | Bon Portage and Kingsport, NS. **MB: Anthony Provincial Park. BoF: Isle Haute,**  **Culloden.** |
| *E. nigrum* Link 1816 | * | Seawater, Sea Air, Sea Foam. **Intertidal Attached Wood** and **Driftwood**. | Bon Portage and Kingsport, NS. **MB: Anthony Provincial Park, West Bay. BoF: Isle Haute, Port Lorne.** |
| *Fusarium acuminatum*  Ellis & Everh. 1895 |  | **Intertidal Attached Wood**. | **CB: Eatonville Harbour.** |
| *F. avenaceum* (Fr.) Sacc. 1886 | * | Driftwood and Marine Wood. **Intertidal Attached Wood** and **Driftwood**. | Bon Portage and Edgett's Beach, NS. **CB: Edgett's Beach, Eatonville Harbour. MB: West Bay, Hall's Harbour. BoF: Isle Haute.** |
| *F. brachygibbosum*  Padwick 1945 |  | **Intertidal Attached Wood**. | **CB: Edgett's Beach.** |
| *F. flocciferum* Corda 1828 |  | **Intertidal Attached Wood**. | **CB: Edgett's Beach.** |
| *F. lateritium* Nees 1816 |  | **Driftwood**. | **MB: Anthony Provincial Park. BoF: Isle Haute.** |

| **Fungus** | **Previous Record** | **Substrate** | **Collection Location** |
| --- | --- | --- | --- |
| *F. oxysporum* Schltdl. 1824 | * | Seawater, Marine Wood, *Spartina*. **Driftwood**, **Intertidal Attached** and **Loose Wood**. | Digby, Wolfville Harbour, Edgett's Beach, NS. **CB: Minudie, Edgett's Beach. MB:**  **Anthony Provincial Park, Houston's Beach, Scots Bay.** |
| *F. palustre* W.H. Elmer & Marra 2011 | * | Seawater, Seaweed, *Spartina*. **Driftwood**, **Intertidal Loose** and  **Attached Wood**. | Hall's Harbour, Kingsport, Wolfville Harbour, NS. **MB: Scots Bay.** |
| *F. sporotrichioides* Sherb. 1915 | * | Sea Air. **Driftwood** and  **Attached Intertidal Wood**. | Bon Portage, NS. **CB: Minudie. MB: West Bay. BoF: Isle Haute**. |
| *Fusarium tricinctum*  (Corda) Sacc. 1886 | * | Driftwood and Seawater.  **Driftwood**. | **Bon Portage, NS. BoF: Isle Haute.** |
| *Ilyonectria robusta* (A.A. Hildebr.) A. Cabral &  Crous 2012 |  | **Intertidal Attached Wood**. | **BoF: Culloden.** |
| *Leptospora* sp. |  | **Intertidal Attached Wood**. | **CB: MacCarron's Brook.** |
| *Lulwoana* sp. | * | **Driftwood** | **BoF: Pond Cove** |
| *Lulworthia* sp. | * | Marine Wood. **Driftwood** and **Intertidal Attached Wood**. | **Edgett's Beach, NS. CB: Minudie. MB: Scots Bay.** |
| *Metapochonia suchlasporia* (W. Gams &  Dackman) Kepler, S.A. Rehner & Humber 2014 |  | **Driftwood**. | **MB: West Bay.** |

| **Fungus** | **Previous Record** | **Substrate** | **Collection Location** |
| --- | --- | --- | --- |
| *Nectria nigrescens* Cooke  1878 |  | **Driftwood**. | **MB: West Bay.** |
| *Neoascochyta paspali* (P.R. Johnst.) Qian Chen & L. Cai 2015 |  | **Driftwood**, **Intertidal Attached** and **Loose Wood**. | **CB: MacCarron's Brook, Edgett's Beach. MB: Anthony**  **Provincial Park, Houston's Beach.** |
| *Neonectria lugdunensis*  (Sacc. & Therry) L. Lombard & Crous 2014 | * | Driftwood. **Intertidal Attached Wood**. | Kingsport, NS. **CB: Spicer's Cove. BoF: East Ferry**. |
| *Neonectria neomacrospora* (C. Booth & Samuels) Mantiri &  Samuels 2001 |  | **Intertidal Loose Wood**. | **CB: East Shulie.** |
| *Neosteophoma cerealis* (E. Müll.) Crous 2020 |  | **Intertidal Attached Wood**. | **CB: Lower Cove.** |
| *Neosetophoma italica*  W.J. Li, Camporesi &  K.D. Hyde 2015 |  | **Intertidal Attached Wood**. | **CB: Minudie.** |
| *Neosetophoma samarorum* (Desm.) Gruyter, Aveskamp & Verkley  2010 |  | **Intertidal Attached Wood**. | **CB: Minudie.** |
| *Paradendryphiella salina* (G.K. Sutherl.) Woudenb. & Crous 2013 | * | Driftwood, Marine Wood, Wood Bait, Sea Air, Seaweed, Seaweed, *Spartina*. **Driftwood**, **Intertidal Attached** and **Loose Wood**. | Briar Island, Edgett's Beach, Bon Portage, NS. **CB: Lower Cove, MacCarron's Brook, East Shulie, Shulie Wharf, Eatonville Harbour. MB: West Bay, Scots Bay. BoF:**  **Port Lorne, East Ferry, Israel's Cove.** |
| *Paradendryphiella* sp. | * | **Intertidal Attached Wood** | **CB: Shulie Wharf** |

| **Fungus** | **Previous Record** | **Substrate** | **Collection Location** |
| --- | --- | --- | --- |
| *Paraphaeosphaeria neglecta* Verkley, Riccioni  & Stielow 2014 |  | **Intertidal Attached Wood**  and **Driftwood**. | **CB: Lower Cove. MB: West Bay.** |
| *Parasarocladium breve* (Sukapure & Thirum.) Summerb., J.A. Scott,  Guarro & Crous 2018 |  | **Intertidal Attached Wood**. | **CB: Minudie.** |
| *Parasarocladium* sp. |  | *Spartina*, Seawater,  Driftwood. **Intertidal Attached Wood**. | Kingsport and Wolfville  Harbour, NS. **MB: Ottawa House.** |
| *Parastagonospora* sp*.* |  | **Driftwood**. | **MB: Scots Bay.** |
| *Parengyodontium album*  (Limber) C.C. Tsang, J.F.W.  Chan, W.M. Pong, J.H.K.  Chen, A.H.Y. Ngan, M.  Cheung, C.K.C. Lai, D.N.C.  Tsang, S.K.P. Lau & P.C.Y. Woo 2016 |  | **Intertidal Attached Wood**. | **BoF: Israel's Cove.** |
| *Penicillium*  *brevicompactum* Dierckx 1901 | * | *Spartina*, Seawater, Seaweed. **Driftwood**. | **MB: Hall's Harbour.** |
| *Penicillium brevistipitatum* L. Wang &  W.Y. Zhuang 2005 |  | **Intertidal Attached Wood**. | **BoF: Israel's Cove.** |
| *Penicillium westlingii*  K.W. Zaleski 1927 |  | **Intertidal Attached Wood**. | **CB: Minudie.** |
| *Pestalotiopsis chamaeropis*  Maharachch., K.D. Hyde & Crous 2014 |  | **Driftwood**. | **BoF: Isle Haute.** |
| *Phaeoacremonium*  *hungaricum* Essakhi, |  | **Driftwood**. | **MB: West Bay.** |

| Mugnai, Surico & Crous 2008 |  |  |  |
| --- | --- | --- | --- |
| **Fungus** | **Previous Record** | **Substrate** | **Collection Location** |
| *Phaeosphaeria culmorum*  (Auersw.) Leuchtm. 1984 | * | Marine Wood, *Spartina*.  **Intertidal Attached Wood**. | Edgett's Beach, Wolfville Harbour, NS. **CB:**  **MacCarron's Brook.** |
| *Phaeosphaeria halima* (T.W. Johnson) Shoemaker & C.E. Babc.  1989 | * | Sea foam. **Intertidal Attached Wood**. | PEI. **MB: Ottawa House.** |
| *Phaeosphaeria* sp. |  | **Intertidal Attached Wood**. | **CB: Minudie.** |
| *Phialocephala lagerbergii* (Melin & Nannf.) Grünig & T.N. Sieber 2009 |  | **Driftwood**. | **BoF: Isle Haute.** |
| *Pilidium* sp. |  | **Intertidal Loose Wood**. | **MB: Houston's Beach.** |
| *Pringsheimia* sp. |  | **Driftwood**, **Intertidal Loose Wood**. | **MB: Bass River, Anthony Provincial Park.** |
| *Pyrenochaetopsis leptospora* (Sacc. & Briard) Gruyter,  Aveskamp & Verkley 2010 |  | **Intertidal Attached Wood**. | **CB: Minudie.** |
| *Sarocladium strictum* (W. Gams) Summerb. 2011 | * | **Driftwood**, **Intertidal Attached** and **Loose Wood**. | **MB: West Bay, Bass River, Houston's Beach. BoF: Port**  **Lorne, Isle Haute.** |
| *Sarocladium* sp. |  | **Intertidal Attached Wood**. | **CB: Minudie.** |
| *Septoriella* sp. | * | Marine Wood, Seawater,  *Spartina*. **Intertidal Attached Wood**. | Edgett's Beach, Kingsport, Wolfville Harbour, NS. **CB:**  **Lower Cove, Edgett's Beach.** |
| *Septoriella poae* (Crous & Quaedvl.) Hern.-Restr.,  J.Z. Groenew. & Crous 2015 |  | **Intertidal Attached Wood**. | **BoF: Margaretsville.** |

| **Fungus** | **Previous Record** | **Substrate** | **Collection Location** |
| --- | --- | --- | --- |
| *Septoriella vagans*  (Niessl) Y. Marín & Crous |  | **Driftwood**. | **BoF: Isle Haute.** |
| *Tolypocladium inflatum*  W. Gams 1971 | * | **Intertidal Attached Wood**. | **BoF: Morden, Sandy Cove.** |
| *Tolypocladium* sp. |  | **Intertidal Attached Wood**. | **CB: Lower Cove.** |
| *Trichoderma samuelsii*  Jaklitsch & Voglmayr 2012 |  | **Driftwood.** | **BoF: Isle Haute.** |
| *Vishniacozyma carnescens* (Verona & Luchetti) Xin Zhan Liu, F.Y. Bai, M. Groenew. & Boekhout  2015 |  | **Intertidal Attached Wood**. | **CB: Lower Cove.** |
| *Vishniacozyma* sp. |  | **Intertidal Attached Wood**. | **MB: Spencer's Island Beach** |
| *Vishniacozyma victoriae* (M.J. Montes, Belloch, Galiana, M.D. García, C. Andrés, S. Ferrer, Torr.- Rodr. & J. Guinea) Xin Zhan Liu, F.Y. Bai, M. Groenew. & Boekhout  2015 |  | **Driftwood**, **Intertidal Attached Wood**. | **CB: Lower Cove. MB: Spencer's Island Beach, West Bay.** |
| *Volutella ciliata* (Alb. & Schwein.) Fr. 1832 |  | **Intertidal Loose Wood**. | **MB: Bass River.** |
| *Zalerion maritima*  (Linder) Anastasiou 1963 | * | Wood Bait, *Spartina*, Seaweed. **Intertidal Attached Wood**. | **CB: Minudie. BoF: Margaretsville, Israel's Cove.** |
